# Supplementary material for: Delays in emergency obstetric referrals in Addis Ababa hospitals in Ethiopia: a facility-based, cross-sectional study
Source: PubMed Central journal article supplement — BMJ Open. 2020 Jun 23;10(6):e033771. doi: 10.1136/bmjopen-2019-033771 (PMC7312330; doi:10.1136/bmjopen-2019-033771), 2020-06-23
Supplement: bmjopen-2019-033771.draft_revisions.pdf [file bmjopen-2019-033771.draft_revisions.pdf]

# BMJ Open

BMJ Open is committed to open peer review. As part of this commitment we make the peer review history of every article we publish publicly available.

When an article is published we post the peer reviewers' comments and the authors' responses online. We also post the versions of the paper that were used during peer review. These are the versions that the peer review comments apply to.

The versions of the paper that follow are the versions that were submitted during the peer review process. They are not the versions of record or the final published versions. They should not be cited or distributed as the published version of this manuscript.

BMJ Open is an open access journal and the full, final, typeset and author-corrected version of record of the manuscript is available on our site with no access controls, subscription charges or pay-per-view fees (<http://bmjopen.bmj.com>).

If you have any questions on BMJ Open's open peer review process please email [info.bmjopen@bmj.com](mailto:info.bmjopen@bmj.com)

# BMJ Open

## Delays in Emergency Obstetrics referrals in Addis Abeba hospitals

|                               |                                                                                                                                                                                          |
|-------------------------------|------------------------------------------------------------------------------------------------------------------------------------------------------------------------------------------|
| Journal:                      | <i>BMJ Open</i>                                                                                                                                                                          |
| Manuscript ID                 | bmjopen-2019-033771                                                                                                                                                                      |
| Article Type:                 | Original research                                                                                                                                                                        |
| Date Submitted by the Author: | 27-Aug-2019                                                                                                                                                                              |
| Complete List of Authors:     | Assefa, Endalkachew; Addis Ababa University, Obstetrics &gynecology ; Addis Ababa University College of Health Sciences, Berhane, Yemane ; Addis Continental Institute of Public Health, |
| Keywords:                     | Addis Abeba, Severe maternal outcomes, Three delay model                                                                                                                                 |
|                               |                                                                                                                                                                                          |

SCHOLARONE™  
Manuscripts

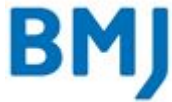

I, the Submitting Author has the right to grant and does grant on behalf of all authors of the Work (as defined in the below author licence), an exclusive licence and/or a non-exclusive licence for contributions from authors who are: i) UK Crown employees; ii) where BMJ has agreed a CC-BY licence shall apply, and/or iii) in accordance with the terms applicable for US Federal Government officers or employees acting as part of their official duties; on a worldwide, perpetual, irrevocable, royalty-free basis to BMJ Publishing Group Ltd ("BMJ") its licensees and where the relevant Journal is co-owned by BMJ to the co-owners of the Journal, to publish the Work in this journal and any other BMJ products and to exploit all rights, as set out in our [licence](#).

The Submitting Author accepts and understands that any supply made under these terms is made by BMJ to the Submitting Author unless you are acting as an employee on behalf of your employer or a postgraduate student of an affiliated institution which is paying any applicable article publishing charge ("APC") for Open Access articles. Where the Submitting Author wishes to make the Work available on an Open Access basis (and intends to pay the relevant APC), the terms of reuse of such Open Access shall be governed by a Creative Commons licence – details of these licences and which [Creative Commons](#) licence will apply to this Work are set out in our licence referred to above.

Other than as permitted in any relevant BMJ Author's Self Archiving Policies, I confirm this Work has not been accepted for publication elsewhere, is not being considered for publication elsewhere and does not duplicate material already published. I confirm all authors consent to publication of this Work and authorise the granting of this licence.

## Delays in Emergency Obstetrics referrals in Addis Abeba hospitals

Endalkachew Mekonnen Assefa<sup>1</sup>, Yemane Berhane<sup>2</sup>

### Abstract

**Background:** Preventing severe maternal outcomes or deaths requires timely and appropriate referrals to facilities capable of providing adequate and appropriate treatment. In the city of Addis Abeba the geographic access to health facilities that provide obstetric emergency services is universal. However, timely referral to obstetric facilities when needed is often delayed leading to unnecessary maternal complications due to many factors. This study tries to assess where the delays occur in the referral chain.

**Methods:** A facility based cross sectional study was conducted in two public hospitals, Zewditu and Gandhi Memorial Hospitals, in Addis Abeba, the capital city of Ethiopia. The study was conducted between December 2018 and February 2019. Data were collected using a pretested and structured questionnaire. All mothers referral to the two hospitals during the study period were included in the study.

**Results:** A total of 403 pregnant women referred for delivery to the study hospitals were included in the study. Three-fourth (301, 74.7%) of referred pregnant mothers had the third delay (delayed care at the receiving hospital); (211, 52.4%) had first delay (delay in making decision to seek care). Overall 366(90.8%) mothers had experienced at least one of the three delays and 71(17.6%) had all the three delays. Twenty-nine (7.2%) referred mothers had severe maternal outcomes (SMO). The most leading causes/diagnosis of SMO were blood transfusion 17 (58.6%) followed by post partum hemorrhage 15 (52%) then eclampsia 9 (31%). In addition, mothers who experienced severe maternal outcomes were 2.9 times more to have at least one of the three delays.

**Conclusion & recommendation:** The majority of the mothers in this study had serious delays in both making decision to seek care for birthing and in actually receiving care once at a hospital. Strengthening the guidelines to reduce delays in maternity care is critical to prevent severe maternal outcomes.

**Key words:** Addis Abeba, Severe maternal outcomes, Three-delay model

## Introduction

The majority of maternal deaths are clustered around labour, delivery and the 24 hours postpartum (1),(2). It is estimated that just five conditions (postpartum hemorrhage; puerperal sepsis; preeclampsia and eclampsia; obstructed or prolonged labour, and complications of unsafe abortion), account for at least 60% of all maternal mortality (3). Life-threatening situations may develop rapidly and without warning, often in previously uncomplicated pregnancies(4).

Globally, it is recognized that significant inroads in maternal mortality cannot be made without dramatically increasing access to emergency obstetrical care (EmOC). The World Health Organization estimates that at least 88–98% of maternal deaths can be averted with timely access to existing, emergency obstetric interventions (5). This produces a triple return on investment, saving mothers and newborns and preventing stillbirths(6).

A number of factors can influence a woman's ability to access effective interventions to treat complications in the event of an obstetric emergency. Thaddeus and Maine (1994) group these into three broad categories using a classic, pathways-based framework known as the 'three delays model'(7). The 'three delays model' attempts to explain delays in women accessing emergency obstetric care as the result of: 1) decision-making, 2) accessing services and 3) receipt of appropriate care once a health facility is reached.

Referral is often associated with the second delay of the three delays model– associated with reaching the appropriate level of care. But in fact, a referral system can reduce all three delays. If a population knows that a system is reliable and affordable, families may make the decision to seek care more quickly (the first delay(8).

The major obstacles that affect the referral system reported by both the health workers and mothers were: 1) financial barriers (for transportation and service payments at health facilities), 2) lack of means of transportation, 3) distance, and 4) lack of awareness of services and the importance of services (9).

Factors associated with health seeking behavior are multidimensional. Socio-cultural and economic problems, lack of awareness, the quality of health services, and infrastructure such as transport services all affect whether and where a woman will seek care, how long it will take to reach care, and whether she receives the appropriate care in a timely fashion(10).

Studies showed referrals in pregnancy and childbirth can be (1) institutional or self-referral, depending on the involvement of first line services; (2) antenatal, delivery or postnatal referral; and (3) elective or emergency referral. Pregnant mothers may be referred due to demographic risks, obstetric historical risks, prenatal complications and delivery and immediate postnatal complications(11). On the other hand, studies show that high risk prediction may not necessarily mean that the woman will have a complication and many women identified as being at risk go on to have normal deliveries(12).

1  
2  
3 Defining a framework and process for obstetric referrals may lead to reduction of maternal mortality  
4 and morbidity. Referral should be broadly defined to include not only transport, but it should be timely  
5 referral to minimize or prevent the delay for transportation (called second delay), and ensure pre-  
6 hospital care while transporting a patient to the referral facility(13), (14).  
7  
8

9 It is widely accepted that substantial reductions in maternal mortality and severe morbidity are  
10 impossible to achieve without an effective referral system for complicated cases(9), (15). There is a  
11 paucity of evidence from Ethiopia on the proportion of complicated and emergency  
12 obstetric cases that are detected and referred to appropriate higher level health institutions.  
13  
14

### 15 **Objectives**

16  
17 The objectives of this study were to identify indications of emergency obstetrics referral and, types of  
18 delay and maternal health outcomes based on the three delay model among mothers who referred for  
19 childbirth.  
20  
21

### 22 **Methods**

23  
24 We used the STROBE cross sectional reporting guidelines (42).  
25  
26

### 27 **Study design and setting**

28 A facility based cross-sectional study was conducted between December 10/2018-February 28/2019 in  
29 two government hospitals Zewditu Memorial Hospital (ZMH) and Gandhi Memorial Hospitals (GMH).  
30 Both hospitals are under Addis Abeba Health Bureau and affiliated with Addis Abeba University College  
31 of Health Sciences. Gandhi Memorial Hospital is a referral maternity hospital and Zewditu Memorial  
32 Hospital is also a comprehensive referral hospital. Both hospitals have 40 (forty) health centers under  
33 them allocated by Ministry of Health and other health facilities which can refer to them after contact.  
34 Both hospitals are giving Comprehensive emergency obstetrics care (CEmoc) and attending more than  
35 17,000 deliveries per a year.  
36  
37  
38

39 The referral system for obstetric emergency in Addis Abeba is organized to include Basic Emergency  
40 obstetric care (BEemoc) facilities and CEemoc facilities. The referral system is developed to work both  
41 ways. Referral between facilities is facilitated by the liason office or Maternal Health Task Force. An  
42 ambulance system is organized to transport mothers which should be accompanied by midwives. The  
43 midwife provides care during transportation and hand-over the mother to the receiving hospital care  
44 provider with a referral paper. In the city, all maternity services including labour/delivery and the  
45 ambulance services are provided free of charge in all government health facilities.  
46  
47  
48

### 49 **Eligibility criteria**

50  
51 All pregnant mothers who were referred for labor and delivery services to the study hospitals and who  
52 gave consent were included in the study. The mothers were identified from emergency or labor  
53 wards daily and interviewed before they were discharged from the hospitals. Residents and interns at  
54 ob-gyn department helped collecting the data using a pre-tested structured and structured  
55  
56  
57

questionnaire. The completed questionnaires were reviewed by principal investigator. Incomplete questionnaires were returned to the person who completed the questionnaire by asking the mother for the second time.

The referral papers reviewed and date, time and diagnosis of referral were recorded for each mother. The triage paper and patient chart are also reviewed including mode of transportation, date and time of arrival, sources of referrals, obstetrics performances, the time taken to admit/get the service after arrival, diagnosis at receiving hospital, gestational age, place and mode of delivery, newborn outcomes and severe maternal complications types and managements. Mothers interviewed on demographic and economic characteristics, time interval to seek medical advice and reason of delay to seek the care (if there was).

The three delays time frame were operationally defined through a consultative process involving obstetrician & gynecologists who had working experience of 7-20 years in the selected hospitals. Accordingly, first delay, time elapsed time between the recognition of a maternal complication and the decision to transport the patient to a health facility, was considered if the decision was not made within 60 minutes. The second delay was if the mother did not reach to referral hospitals within 60 minutes of referral. The third delay was if the mother didn't receive care or intervention within 30 minutes. Severe Maternal outcomes were any maternal complication including laboratory evidences of organ damage and maternal death during the process of delivery or before discharge from the hospital. Potentially life threatening maternal conditions (PLTMC) was considered when the mother had at least one of the following; hemorrhagic complications, hypertensive disorders and complications, end organ injury, blood product transfusion, ICU admission, uterine rupture, hysterectomy/laparotomy.

**Study size:** Single proportion formula used. By assuming 50% of the referred mothers have delay, degree of precision of 5% (d) and confidence interval of 95% (Z=1.96) the sample size was 403.

### Analyses

Data were entered in epi-info version 7.2.2.6 and transported to SPSS Version-21 statistics software for cleaning and analysis. Descriptive statistical were used to present mothers by their socio-demographic characteristics, referral diagnosis, diagnosis at receiving hospitals, obstetrics characteristics, mode of delivery, newborn outcomes, the three delays, and severe maternal outcomes. Severe maternal outcomes were analyzed for the three delays. The relationship between the three delays and SMO were examined using the multivariate logistic regression. The goodness of the model was tested by Hosmer-Lemeshow test for goodness-of-fit. Selected variables were included in the model to account for maternal characteristics differences other than delays in seeking and receiving care.

### Ethics approval

Ethical clearance was obtained from both Addis Continental Institute of Public Health (ACIPH) and Addis Abeba Health Bureau (AAHB). Support letters were written to both study hospitals from the local health authorities to gain access. Informed consent was obtained from each mother who participated in the study after ensuring their privacy and confidentiality of information.

## Results

A total of 403 pregnant mothers referred for labor/delivery services to the study hospitals were included. The majorities were married (380, 94.3%), and have completed at least secondary school (54.3%). The median age was 26 years (range 18-43 years) and the median gravidity was 3 (range 1-7). Majority mothers were primigravida (56.1%) and most pregnant mothers (58.8%) were at term pregnancy (37 weeks-41w6d)(Table1).

Table 1. Socio-demographic and obstetrics characteristics of respondents, Addis Abeba, Ethiopia, 2019 (n=403)

| Characteristics n=403                             | Number (%) |
|---------------------------------------------------|------------|
| <b>Study Hospital</b>                             |            |
| Gandhi Memorial Hospital (GMH)                    | 173 (42.9) |
| Zewditu Memorial Hospital (ZMH)                   | 230 (57.1) |
| <b>Age (years) median: 26 years (range 18-43)</b> |            |
| < 20                                              | 32 (7.9)   |
| 20-25                                             | 158 (39.2) |
| 26-30                                             | 151 (37.5) |
| 31-35                                             | 46 (11.4)  |
| ≥36                                               | 16 (4.0)   |
| <b>Marital status</b>                             |            |
| Married                                           | 380 (94.3) |
| Others(unmarried, divorced)                       | 23 (5.7)   |
| <b>Educational level</b>                          |            |
| No formal education                               | 49 (12.2)  |
| Primary school                                    | 135 (33.5) |
| Secondary school                                  | 117 (29.0) |
| Preparatory                                       | 35 (8.7)   |
| Vocational and above                              | 67 (16.6)  |



|                 |            |
|-----------------|------------|
| Gravidity n=403 |            |
| 1               | 226 (56.1) |
| 2-4             | 165 (40.9) |
| ≥5              | 12 (3.0)   |
| Parity n=146    |            |
| 1               | 90 (61.6)  |
| ≥2              | 56 (38.4)  |
| Abortion n=60   |            |
| 1               | 48 (80)    |
| ≥ 2             | 12 (20)    |
| Gestational age |            |
| 28-33w6d        | 9(2.2)     |
| 34-36w6d        | 22 (5.5)   |
| 37-41w6d        | 237 (58.8) |
| ≥ 42            | 42 (10.4)  |
| Unknown         | 93 (23.1)  |

The majority of the pregnant mothers were referred from health centers (387, 96%) and transported by the ambulance provided by the health facility. The three most common referral diagnosis were term premature rupture of membrane (PROM) (25.8%), latent first stage of labour abnormality (16.6%), and post term pregnancy (15.4%)(Table 2).

The most common diagnosis at the receiving hospital following reassessment of the mother were latent first stage of labor (126, 31.3%), term premature rupture of membrane (123, 30.5%), and active first stage of labor (18.9%) (Table 2).

Table 2. Source of referral, transportation, referral and receiving hospital diagnosis, mode & place of delivery, among referred pregnant mothers for delivery, Addis Abeba, Ethiopia, 2019.

| Characteristics | Number (%) |
|-----------------|------------|
|-----------------|------------|

|                                                        |            |
|--------------------------------------------------------|------------|
| Source of referral N=403                               |            |
| Health Center                                          | 387 (96.0) |
| Others                                                 | 16 (4.0)   |
| Transportation                                         |            |
| Ambulance                                              | 290 (72)   |
| Others( Taxi, personal car)                            | 113 (28)   |
| Receiving hospital contacted before the women referred |            |
| Yes                                                    | 157 (39.0) |
| No                                                     | 246 (61.0) |
| Referral diagnosis ** N=403                            |            |
| Antepartum hemorrhage (APH)                            | 11 (2.8)   |
| Pregnancy induced hypertension (PIH)                   | 51 (12.7)  |
| Previous c-section scar                                | 19 (4.7)   |
| Latent phase labor abnormality                         | 67 (16.6)  |
| Active phase labor abnormality                         | 52 (12.9)  |
| Second stage labor abnormality                         | 20 (5.0)   |
| Post term pregnancy                                    | 62 (15.4)  |
| Malpresentation/malposition                            | 14 (3.5)   |
| Premature rupture of membrane (PROM)                   | 104 (25.8) |
| Cephalopelvic disproportion (CPD)                      | 6 (1.5)    |
| Non-reassuring fetal heart pattern(NRFHRP)             | 25 (6.2)   |
| Meconium staining amniotic fluid (MSAF)                | 25 (6.2)   |
| Others                                                 | 19 (4.7)   |
| Diagnosis at receiving hospital ** N=403               |            |

|                                             |            |
|---------------------------------------------|------------|
| Ante partum hemorrhage (APH)                | 13 (3.2)   |
| Pregnancy induced hemorrhage (PIH)          | 54 (13.4)  |
| Previous C-section scar                     | 18 (4.5)   |
| Latent first stage of labor (LFSOL)         | 126 (31.3) |
| Active first stage of labor                 | 76 (18.9)  |
| Second stage of labor                       | 29 (7.2)   |
| Post-term                                   | 52 (12.9)  |
| Malpresentation/malposition                 | 18 (4.5)   |
| Premature rupture of membrane (PROM)        | 123 (30.5) |
| Cephalopelvic disproportion (CPD)           | 7 (1.7)    |
| Non-reassuring fetal heart pattern (NRFHRP) | 13 (3.2)   |
| Meconium staining                           | 21 (5.2)   |
| Others                                      | 28 (6.9)   |

\*\* percentage is > 100 % due to more than one answer is possible

The majority of the mothers delivered through vaginal route (254, 63.3%) and the remaining by C-section (148, 36.7%). The most common indication for C-section were non-reassuring fetal heart rate pattern (27 %), cephalo-pelvic disproportion/malpresentation/malposition (24.3%), and meconium staining in latent first stage of labor (22.3%). The majority of the babies were born alive (96.5%). There were eight (2%) intra-partum fetal losses among total deliveries (table 3).

Table 3. Mode of delivery, place of delivery and perinatal outcome of referred mothers, Addis Abeba, Ethiopia 2019.

| <b>Mode of delivery</b>  |            |
|--------------------------|------------|
| Vaginal delivery         | 229 (56.8) |
| Assisted breech delivery | 4 (1.0)    |
| C-section                | 148 (36.7) |
| Instrumental delivery    | 21(5.2)    |
| Vacuum                   | 16 (4.0)   |

|                                   |                                              |     |            |
|-----------------------------------|----------------------------------------------|-----|------------|
|                                   | Forceps                                      |     | 5 (1.2)    |
|                                   | Laparotomy                                   |     | 1 (0.2)    |
| <b>C-section indication N=148</b> |                                              |     |            |
|                                   | Non-reassuring fetal heart rate (NRFHR)      |     | 40 (27.0)  |
|                                   | Meconium in LFSOL                            |     | 33 (22.3)  |
|                                   | Cephalopelvic disproportion (CPD)            |     | 21 (14.2)  |
|                                   | Malpresentation/malposition                  |     | 15 (10.1)  |
|                                   | Previous C-scar with labor/labor abnormality |     | 10 (6.8)   |
|                                   | Cord prolapse/presentation                   |     | 7 (4.7)    |
|                                   | Non reassuring biophysical profile (NRBPP)   |     | 5 (3.4)    |
|                                   | APH                                          |     | 4 (2.7)    |
|                                   | Others                                       |     | 13(8.8)    |
| <b>Place of delivery N=403</b>    |                                              |     |            |
|                                   | Labor ward/Operation room                    |     | 386 (95.8) |
|                                   | Emergency OPD                                |     | 17 (4.2)   |
| <b>Outcome N=403</b>              |                                              |     |            |
|                                   | Alive                                        |     | 389 (96.5) |
|                                   | Newborn referred to NICU                     | Yes | 137 (34)   |
|                                   |                                              | No  | 252 (62.5) |
|                                   | Stillbirth                                   |     | 14 (3.5)   |
|                                   | Fetal heart beat positive on arrival         |     | 8(2.0)     |
|                                   | Fetal heart beat negative on arrival         |     | 6(1.5)     |

Among 403 referred mothers for childbirth, 71(17.6%) mothers experienced all the three delays. Almost three-fourth referred mothers (74.7%) experienced third delay followed by first delay (52.4%). Majority (366, 90.8%) mothers had at least one of the delays (Table 3).

Table 3. The frequency of the three delays among referred mothers, Addis Abeba, Ethiopia 2019.

| Characteristics    | Number (%) |            |
|--------------------|------------|------------|
|                    | Yes        | No         |
| N=403              |            |            |
| First delay        | 211 (52.4) | 192 (47.6) |
| Second delay       | 163 (40.4) | 240(59.6)  |
| Third delay        | 301(74.7)  | 102(25.3)  |
| At least one delay | 366 (90.8) | 37 (9.2)   |
| All three delay    | 71 (17.6)  | 332 (82.4) |

\*\* multiple answer possible

Twenty-nine (7.2%) mothers had severe maternal outcomes. The most common severe maternal outcome was blood transfusion (58.6%) followed by post partum hemorrhage (51.7%) then eclampsia (31%). Nearly three-fourth mothers with SMO (78.5%) had more than one complication (Figure1).

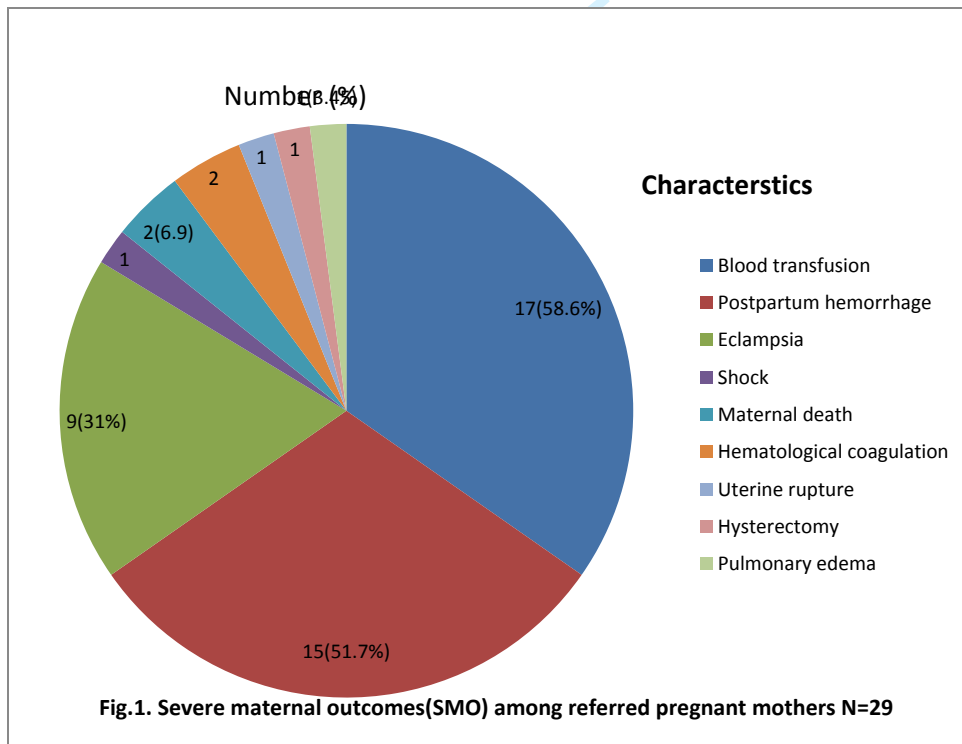

The most common delays in mothers with SMO were third delay (58.6%) followed by first delay (51.7%). All most three-fourth mothers experienced at least one of the delays (79.3%) and one-quarter (24.1%) mothers had all the delays (table 4).

Statistically significant association was observed between SMO and third delay, at least one of the delays. Referred mothers with the third delay had 2.2 times (95% CI of 1.025-4.840) more likely to be a risk for severe maternal outcomes. Mothers who experienced at least one of the delays had 2.9 times (95% CI 1.093-7.620) more likely to be a risk for severe maternal outcomes (table 4).

After adjusted for age, gravidity, parity, educational level and marital status none of the delays were significant. This may be due to small sample of mothers with SMO. Also the three delays were not significant for age, gravidity, parity, educational level, gestational age and marital status.

Table 4. SMO and types of delays Addis Abeba, Ethiopia 2019.

| Characteristics    | Severe maternal outcomes |             |            |              |                           |
|--------------------|--------------------------|-------------|------------|--------------|---------------------------|
|                    | Types of delay           | No          | Yes        | P-value      | COR 95 % CI               |
|                    |                          | Number (%)  | Number (%) |              |                           |
| First delay        | No                       | 178 (47.6%) | 14 (48.3)  |              |                           |
|                    | Yes                      | 196 (52.4)  | 15 (51.7)  | <b>0.944</b> | <b>1.028(0.483-2.189)</b> |
| Second delay       | No                       | 224 (59.9)  | 16 (55.2)  |              |                           |
|                    | Yes                      | 150 (40.1)  | 13 (44.8)  | <b>0.618</b> | <b>1.213(0.567-2.596)</b> |
| Third delay        | No                       | 90(24.1)    | 12 (41.4)  |              |                           |
|                    | Yes                      | 284 (75.9)  | 15 (58.6)  | <b>0.043</b> | <b>2.227(1.025-4.840)</b> |
| All delays         | No                       | 310 (82.9)  | 22 (75.9)  |              |                           |
|                    | Yes                      | 64 (17.1)   | 7 (24.1)   | <b>0.342</b> | <b>1.541(0.632-3.761)</b> |
| At least one delay | No                       | 31 (8.3)    | 6 (20.7)   |              |                           |
|                    | Yes                      | 343 (91.7)  | 23(79.3)   | <b>0.032</b> | <b>2.889(1.093-7.620)</b> |

\*\*AOR not significant after adjusted for age, marital status, educational level, gestational age, gravidity, parity.

Eighty (19.9%) of referred mothers had at least one potential life threatening conditions (PLTC). The most common complications was hypertensive disorders 56 (70%) followed by blood transfusion 17 (21.3%) then post partum hemorrhage (table 5).

Table 5. Potentially life threatening conditions among referred mothers Addis Abeba, Ethiopia, 2019

| Characteristics* N=80                     | Number (%) |
|-------------------------------------------|------------|
| <b>Hemorrhagic complications</b>          |            |
| Ante partum hemorrhage (AP,PP)            | 13 (16.3)  |
| Post partum hemorrhage (PPH)              | 15 (18.8)  |
| Ruptured uterus                           | 1 (1.25)   |
| Coagulopathy                              | 2 (2.5)    |
| <b>Hypertensive disorders</b>             |            |
| Severe hypertension/Preeclampsia          | 50 (62.5)  |
| Eclampsia                                 | 9 (11.3)   |
| HELLP syndrome                            | 2 (2.5)    |
| <b>Others</b>                             |            |
| Pulmonary edema                           | 1 (1.25)   |
| Shock                                     | 1(1.25)    |
| Thrombocytopenia                          | 2 (2.5)    |
| <b>Management indication of severity</b>  |            |
| Transfusion of blood derivatives          | 17 (21.3)  |
| Major surgical intervention(hysterectomy) | 1(1.25)    |

\*Multiple response possible

## Discussion

All three types of delay were common in maternity services in the study hospitals; the most severe being the delay within the receiving hospital. The most common referral diagnoses were premature rupture of membranes (PROM), latent phase labor abnormality and post-term pregnancy. The third delay was significantly associated with severe maternal outcomes.

This study is similar to previous study in Addis Abeba showed that PROM was the most common referral diagnosis contributed 19.7 % (16); this is different from other reports in other sub-Saharan countries (17). There were many discrepancies of cases diagnosis between at referring and at receiving hospitals, the most common diagnosis at receiving hospitals are the latent first stage of labor (31.3%) followed by premature rupture of membrane (29%). Some cases were under-/over-diagnosed. Non-reassuring fetal heart rate pattern/fetal distress were twice over diagnosed; on the other hand latent first stage of labor twice less under-diagnosed at referring facilities. These discrepancies might occur due to differences between the qualification of care providers at the health center and referral hospitals. In the health centers midwives are the main caregivers while in the receiving hospitals midwives, medical interns, general practitioners, residents, and obstetrician and gynecologist involved in maternal care. Variation in providers' competences can be contributing factor to the observed gaps (18).

Studies have found that distance to facilities is a clear barrier to women accessing health facilities (19) (20) but in Addis Abeba, proximity to services does not appear to be a problem, as the median distance to a facility that provides surgical services is 5 kilometers, well below the national average of 45 kilometers (21). Two-fifth of mothers had the second delay. When we compare with other studies it may be low however this proportion of the second delay is not expected because referring facilities/catchment health centers are near to the receiving hospitals and expected to refer by ambulance (21).

Our study showed the rate of occurrence of SMO indicators were higher than the findings of an earlier study done in other parts of the country (22) (23) (24) (25) and other countries (26) (27). This high proportion SMO might be due to the fact that our study selected facilities are referral hospitals which are serving complicated cases and cases referred from other health facilities which were beyond their capacity/needed further interventions. This study showed that direct obstetric causes were the most common leading factors of SMO and the most common diagnosis were postpartum hemorrhage (52%) followed by eclampsia (31%) and the most common intervention was blood transfusion (58.6%). Obstetric hemorrhage and hypertensive disorders (eclampsia, hematological coagulation, and pulmonary edema) were found to be the top underlying complications among cases of SMO; similarly, hypertensive disorders and obstetric hemorrhage were the most common underlying causes of PLTC. This is comparable to the findings from studies in other parts of the country (23), (24) (28) and other countries (27, 29-31) including sub-Saharan countries (32).

Emergency obstetric care use by women is influenced by a complex interaction of factors leading to delay in decision-making, accessing services and receipt of proper care once a health facility is reached (33). Receiving appropriate care after reaching at the health facility (delay three) was the most common



(58.6%) followed by delay in seeking care (delay one) (51.7%) then reaching at the appropriate health facility (delay two) (44.8%) were identified among SMO and more than half of (58.6%) SMO cases had encountered at least one of the delays which were similar to study done elsewhere in the country (23) (34) (35) (36); however delay two and one is seen less frequently than the findings from other developing countries (17) (27) (33) (34) (38) (39). This can be justified by overloaded of cases, limited hospitals capacity, a difference in socio-demographic characteristics of the study population and the proximity of health facilities.

In this study, failure to receiving appropriate care after reaching at the health facility (delay three) was found to have the strongest association with SMO: with a two-fold increase in the risk. This supports the WHO hypothesis relating a high case fatality in the hospital as an indicator for the presence of delay in receiving an adequate and proper treatment (40) and it indicates the poor performance of obstetrics services (41). Seeking care from a facility that is incapacitated health facility and system, poor leadership (mismanagements of hospital resources, poor co-ordinations and lack of understanding of obstetrics emergencies) contribute to significant delay after reaching the health facility. These factors were reported as significant contributors to delay in several studies (23)(34) (36). Studies from Tigray, 88% of all maternal deaths were attributed to health system failure (35). In our study, 59 % of SMO cases and both maternal deaths (MD) had health system related factors as a possible reason for delay three.

The limitation of this study include that it was conducted in two referral hospitals which often receive complicated cases and referred mother with complications; and the results might not be representative of other institutions and the community. In addition, cases were missed because they transferred to health centers after two hours of uncomplicated vaginal delivery.

However, we believe that this study gives the extent of delays and SMO &its indicators experienced by women who were referred for an emergency delivery. In fact, if the delay is so severe in these well-established referral centers one may expect it to be worse in some not well staffed and equipped centers. We decided to focus on women with severe maternal outcomes (SMO) rather than less severe forms of obstetric complications because their situations are the closest to maternal deaths.

## Conclusion

The burden of severe maternal outcomes (SMO) is high due to preventable and/or treatable direct obstetric. The majority of the mothers in this study had serious delays in both making decision to seek care for birthing and in actually receiving care once at a hospital. We recommend strengthening health referral systems, provision of training to maternal health service providers at the referring facilities, and addressing specific health system bottlenecks during labor and birth in order to ensure no mother will be endanger.

## Abbreviations

AFSOL: Active First Stage of Labor

ANC: Antenatal Care

1  
2  
3 BEmOC: Basic Emergency Obstetrics Care  
4

5 CEmOC: Comprehensive Emergency Obstetrics Care  
6

7 EOPD: Emergency Out-Patient Department  
8

9 GMH: Gandhi Memorial Hospital  
10

11 HELLP: Hemolysis, Elevated liver enzyme, Low Platelets  
12

13 LFSOL: Latent First Stage of Labor  
14

15 LW: Labor Ward  
16

17 MD: Maternal Death Ratio  
18

19 MNM: Maternal Near-Miss  
20

21 MWH: Maternity Waiting Home  
22

23 NICU: Neonatal Intensive Care Unit  
24

25 PIH: Pregnancy Induced Hypertension  
26

27 PLTC: Potential Life Threatening Conditions  
28

29 PPH: Post Partum Hemorrhage  
30

31 PROM: Premature Rupture of Membrane  
32

33 SMO: Severe Maternal Outcomes  
34

35 WHO: World Health Organization  
36

37 ZMH: Zewditu Memorial Hospital  
38

### 39 **Acknowledgments**

40  
41 We would like to thank residents and Interns of Addis Abeba University-College of Health sciences:  
42 without their support on data collection this research may not be reach to this stage.  
43  
44  
45  
46  
47

### 48 **Author details**

49  
50 <sup>1</sup>Endalkachew Mekonnen Assefa (MD, MPH), Addis Abeba University-College of Health Sciences  
51 Department of Obstetrics and Gynecology; e-mail-[endmekon@gmail.com](mailto:endmekon@gmail.com); phone no. +251-913605674;  
52 corresponding author  
53  
54

55 <sup>2</sup>Yemane Berhane (MD, PhD), Addis Continental Institute of Public Health; [yemaneberhane@gmail.com](mailto:yemaneberhane@gmail.com)  
56  
57

1  
2  
3 **Contributors:** EMA wrote the draft of the paper, performed the data analysis and wrote the final  
4 manuscript. YB advised the paper's scope and the draft of manuscript. Both authors approved the final  
5 version.  
6

7  
8 **Conflict of interest:** None declared  
9

10 **Source of funding:** 'This research received no specific grant from any funding agency in the public,  
11 commercial or not-for-profit sectors'.  
12

13 **Ethics approval:** Ethical approval was received from both Addis Continental Institute of Public Health  
14 and Addis Abeba Health Bureau ethical review board.  
15

16  
17 **Data availability statement:** data are available from the corresponding author upon reasonable  
18 request.  
19

## 20 21 22 **References**

- 23  
24 1. Campbell O, Graham WJ. Measuring maternal mortality and morbidity: levels and trends. London:  
25 Lond Sch Hyg Trop Med. 1990;  
26
- 27  
28 2. Li XF, Fortney JA, Kotelchuck M, Glover LH. The postpartum period: the key to maternal mortality. Int  
29 J Gynaecol Obstet.1996;54:1–10.  
30
- 31  
32 3. Khan KS, Wojdyla D, Say L, Gulmezoglu AM, Van Look PF. WHO analysis of causes of maternal death: a  
33 systematic review.2006;Lancet 367:1066– 1074.  
34
- 35  
36 4. Fortney J. Emergency obstetric care: the keystone in the arch of safe motherhood. .; IJOG.  
37 2001;(74):95–97.  
38
- 39  
40 5. World Health Organization (WHO). Maternal Mortality. Fact Sheet. Media Centre. 2016;  
41
- 42  
43 6. World Health Organization (WHO). True magnitude of stillbirths and maternal and neonatal deaths  
44 underreported. Media Cent. 2016;  
45
- 46  
47 7. Thaddeus S, Maine D. Too far to walk: maternal mortality in context. Soc Sci Med. 1994;38:1091–110.  
48
- 49  
50 8. The Effectiveness of Emergency Obstetric Referral Interventions in Developing Country Settings: A  
51 Systematic Review [Internet]. [cited 2018 Jul 28]. Available from:  
52 <http://journals.plos.org/plosmedicine/article?id=10.1371/journal.pmed.1001264>  
53
- 54  
55 9. Knight HE, Self A, Kennedy SH. Why Are Women Dying When They Reach Hospital on Time? A  
56 Systematic Review of the 'Third Delay.' PLoS ONE [Internet]. 2013 May 21 [cited 2018 Sep 7];8(5).  
57 Available from: <https://www.ncbi.nlm.nih.gov/pmc/articles/PMC3660500/>  
58  
59  
60

10. JSI Research and Training Institute. The Last 10 Kilometers (L10K). Emergency referral for pregnant women and newborns: A Rapid Community and Health System Assessment. BETA Development Consulting Firm, Addis Abeba. 2012 Jun;
11. U. Onwudiegwu, O. C.Ezechi. Emergency obstetric admissions: late referrals, misdiagnoses and consequences. *J J Obstet Gynaecol.* 2001;Volume 21(Issue 6).
12. Bossyns P, Abache R, Abdoulaye MS, Miyé H, Depoorter A-M, Van Lerberghe W. Monitoring the referral system through benchmarking in rural Niger: an evaluation of the functional relation between health centres and the district hospital. *BMC Health Serv Res.* 2006 Apr 12;6(1):51.
13. Giovine A, Ostrowski C. Technical report on Improving Transportation and Referral for Maternal Health: Knowledge Gaps and Recommendations. Wilson Cent. 2010;
14. Ronsmans C, Graham WJ, Lancet. Maternal Survival Series steering group: Maternal mortality: who, when, where, and why. *Lancet.* 2006;(368(9542)):1189–2000.
15. Qureshi RN, Sikandar R, Hoodbhoy Z, Bano R, Jabeen N. Referral pattern of emergencies in obstetrics: Implications for defining scope of services and policy. *JPMA J Pak Med Assoc.* 2016;66(12):1606–10.
16. Alemnesh H. Mirkuzie, Mitike Molla Sisay and Mulu Muleta Bedane. High proportions of obstetric referrals in Addis Abeba: the case of term premature rupture of membranes. 2016. 9:40.
17. David M. Goodman, Emmanuel K. Srofenyoh, Adeyemi J. Olufolabi, Sung Min Kim and Medge D. Owen. The third delay: understanding waiting time for obstetric referrals at a large regional hospital in Ghana:*BMC Pregnancy and Childbirth* (2017) 17:216; DOI 10.1186/s12884-017-1407-4.
18. Alemnesh H Mirkuzie<sup>1</sup>, Mitike Molla Sisay, Alemnesh Tekelebirhan Reta, et al. Current evidence on basic emergency obstetric and newborn care services in Addis Abeba, Ethiopia; a cross sectional study:2013.
19. McNamee P, Ternent L, Hussein J. Barriers in accessing maternal healthcare: evidence from low-and middle-income countries. *Expert Rev Pharmacoecon Outcomes Res.*2009;9(1):41–8.
20. Gabrysch SC, Oona MR. Still to far to walk: Literature review of the determinants of delivery service use. *BMC Pregnancy Childbirth.* 2009;9(34).<http://www.biomedcentral.com/1471-2393/9/34>.
21. Federal Ministry of Health, Addis Abeba Regional Health Bureau. Emergency Obstetric and Newborn Care Services: Standard Operation Manual for Activities of Catchement Teams in Addis Abeba. 2012.
22. Dile M, Abate T, Seyum T. Proportion of maternal near misses and associated factors in referral hospitals of Amhara regional state, Northwest Ethiopia: institution based cross sectional study. *GynecolObstet (Sunnyvale).* 2015;5:308. <https://doi.org/10.4172/2161-0932.1000308>.

- 1  
2  
3 23. Wondimagegnehu Sisay Woldeyes<sup>1,2</sup>, Dejene Asefa<sup>3\*</sup> and Geremew Muleta. Incidence and  
4 determinants of severe maternal outcome in Jimma University teaching hospital, south-West Ethiopia: a  
5 prospective cross-sectional study. *Woldeyes Al BMC Pregnancy Childbirth* 2018. 18:255(18:255).  
6  
7  
8 24. Gebrehiwot Y, Tewolde BT. Improving maternity care in Ethiopia through facility based review of  
9 maternal deaths and near misses. *Int J GynecolObstet.* 2014;127:S29–34.  
10  
11 25. Liyew EF, Yalew AW, Afework MF, Esse. Incidence and causes of maternal near-miss in selected  
12 hospitals of Addis Abeba, Ethiopia. *ONE.* 2017;12(6):e0179013.  
13 <https://doi.org/10.1371/journal.pone.0179013>.  
14  
15  
16 26. Jabir M, et al. Maternal near miss and quality of maternal health care in Baghdad, Iraq. *BMC*  
17 *Pregnancy Childbirth.* 2013;13:11.  
18  
19 27. Leonardo Antonio Chavane, Patricia Bailey, Osvaldo Loquiha, Martinho Dgedge, Marc Aerts<sup>5</sup>, and  
20 Marleen Temmerman. Maternal death and delays in accessing emergency obstetric care in  
21 Mozambique. *BMC Pregnancy and Childbirth.* (2018) 18:71 <https://doi.org/10.1186/s12884-018-1699-z>.  
22  
23  
24 28. Özge Tunçalp, Michelle J. Hindin, Kwame Adu-Bonsaffoh, Richard M., Adanu. Assessment of  
25 maternal near-miss and quality of care in a hospitalbased study in Accra, Ghana. *Int J Gynecol Obstet*  
26 123 (2013) 58–63.  
27  
28  
29 29. Say L, Souza JP, Pattinson RC. WHO working group on Maternal Mortality and Morbidity  
30 classifications. Maternal near miss—towards a standard tool for monitoring quality of maternal health  
31 care. 2009. 23:287–96.  
32  
33  
34 30. Nelissen EJ, et al. Maternal near miss and mortality in a rural referral hospital in northern Tanzania: a  
35 cross-sectional study. *BMC Pregnancy Childbirth.* 2013;13:141.  
36  
37  
38 31. Oladapo et al. When getting there is not enough: a nationwide cross-sectional study of 998 maternal  
39 deaths and 1451 near-misses in public tertiary hospitals in a low-income  
40 country. *BJOG.* 2015. [www.bjog.org](http://www.bjog.org). DOI: 10.1111/1471-0528.13450.  
41  
42 32. Dan K Kaye, Othman Kakaire, and Michael O Osinde. Systematic review of the magnitude and  
43 case fatality ratio for severe maternal morbidity in sub-Saharan Africa between 1995 and 2010. *BMC*  
44 *Pregnancy Childbirth.* 2011;11(65).doi: 10.1186/1471-2393-11-65.  
45  
46  
47 33. Ayele Geleto, Catherine Chojenta, Abdulbasit Musaand Deborah Loxton. Barriers to access and  
48 utilization of emergency obstetric care at health facilities in sub-Saharan Africa: a systematic review of  
49 literature. (2018) 7:183. <https://doi.org/10.1186/s13643-018-0842-2>.  
50  
51  
52 34. Knight HE, Self A, Kennedy SH. Why are women dying when they reach hospital on time? A  
53 systematic review of the ‘third delay’. *PLoS One.* 2013; 8(5):e63846.  
54 <https://doi.org/10.1371/journal.pone.0063846>.  
55  
56  
57  
58  
59  
60

- 1  
2  
3 35. Hailu S, Enqueselassie F, Berhane Y. Health facility-based maternal death audit in Tigray, Ethiopia.  
4 Ethiop J Health Dev. 2009; 23:115–9.  
5  
6  
7 36. Rodolfo Carvalho Pacagnella, Jose Guilherme Cecatti, Maria Jose Osis & João, Paulo Souza. The role  
8 of delays in severe maternal morbidity and mortality: expanding the conceptual  
9 framework. *Reproductive Health Matters* 2012;20(39):155–163. [www.rhm-elsevier.com](http://www.rhm-elsevier.com).  
10 Doi:0.1016/S0968-8080(12)39601-8.  
11  
12 37. Rodolfo C Pacagnella, José G Cecatti, Mary A Parpinelli, Maria H Sousa, Samira M Haddad, Maria L  
13 Costa, João P Souza, Robert C Pattinson and the Brazilian Network for the Surveillance of Severe  
14 Maternal Morbidity, study group. Delays in receiving obstetric care and poor maternal outcomes: results  
15 from a national multicentre cross-sectional study. *BMC Pregnancy and Childbirth* 2014, 14:159.  
16  
17 38. Bouchra Assarag, Bruno Dujardin, Alexandre Delamou, Fatima-Zahra Meski,, Vincent De Brouwere.  
18 Determinants of Maternal Near-Miss in Morocco: Too Late, Too Far, Too Sloppy? *PLOS ONE* | January 22,  
19 2015. DOI:10.1371/journal.pone.0116675.  
20  
21 39. Saira Yunus, Shahnaz Kauser, Shazia Ali. Three “Delays” as a framework for critical analysis of  
22 maternal near miss and maternal mortality. *Journal of South Asian Federation of Obstetrics and*  
23 *Gynecology*, May-August 2013;5(2):57-59.  
24  
25 40. World Health Organization. Evaluating the quality of care for severe pregnancy complications: the  
26 WHO near-miss approach for maternal health. Geneva: WHO; 2011.  
27  
28 41. Filippi V, Ronsmans C, Gohou V, et al. Maternity wards or emergency obstetric rooms? Incidence of  
29 near-miss events in African hospitals. *Acta Obstetrica et Gynecologica Scandinavica* 2005;84(1):11–16.  
30  
31 42. Von Elm E, Altman DG, Egger M, Pocock SJ, Gotsche PC, Vandenbroucke JP. The Strengthening the  
32 Reporting of Observational Studies in Epidemiology (STROBE) Statement: guidelines for reporting  
33 observational studies.  
34  
35  
36  
37  
38  
39  
40  
41  
42  
43  
44  
45  
46  
47  
48  
49  
50  
51  
52  
53  
54  
55  
56  
57  
58  
59  
60

# Reporting checklist for cross sectional study.

Based on the STROBE cross sectional guidelines.

## Instructions to authors

Complete this checklist by entering the page numbers from your manuscript where readers will find each of the items listed below.

Your article may not currently address all the items on the checklist. Please modify your text to include the missing information. If you are certain that an item does not apply, please write "n/a" and provide a short explanation.

Upload your completed checklist as an extra file when you submit to a journal.

In your methods section, say that you used the STROBE cross sectional reporting guidelines, and cite them as:

von Elm E, Altman DG, Egger M, Pocock SJ, Gøtzsche PC, Vandenbroucke JP. The Strengthening the Reporting of Observational Studies in Epidemiology (STROBE) Statement: guidelines for reporting observational studies.

|                           |                                                                                                       | Page   |
|---------------------------|-------------------------------------------------------------------------------------------------------|--------|
|                           | Reporting Item                                                                                        | Number |
| <b>Title and abstract</b> |                                                                                                       |        |
| Title                     | <a href="#">#i</a> Indicate the study's design with a commonly used term in the title or the abstract |        |
| Abstract                  | <a href="#">#i</a> Provide in the abstract an informative and balanced summary of                     |        |

what was done and what was found

## Introduction

Background / [#1](#) Explain the scientific background and rationale for the rationale investigation being reported

Objectives [#3](#) State specific objectives, including any prespecified hypotheses

## Methods

Study design [#3](#) Present key elements of study design early in the paper

Setting [#3](#) Describe the setting, locations, and relevant dates, including periods of recruitment, exposure, follow-up, and data collection

Eligibility criteria [#3](#) Give the eligibility criteria, and the sources and methods of selection of participants.

[#4](#) Clearly define all outcomes, exposures, predictors, potential confounders, and effect modifiers. Give diagnostic criteria, if applicable

Data sources / [#4](#) For each variable of interest give sources of data and details of measurement methods of assessment (measurement). Describe comparability of assessment methods if there is more than one group. Give information separately for for exposed and unexposed groups if applicable.

Bias [#4](#) Describe any efforts to address potential sources of bias

Study size [#4](#) Explain how the study size was arrived at



|    |                |                      |                                                                   |
|----|----------------|----------------------|-------------------------------------------------------------------|
| 1  | Quantitative   | <a href="#">#4</a>   | Explain how quantitative variables were handled in the            |
| 2  |                |                      |                                                                   |
| 3  | variables      |                      | analyses. If applicable, describe which groupings were chosen,    |
| 4  |                |                      |                                                                   |
| 5  |                |                      | and why                                                           |
| 6  |                |                      |                                                                   |
| 7  |                |                      |                                                                   |
| 8  |                |                      |                                                                   |
| 9  | Statistical    | <a href="#">#n/a</a> | Describe all statistical methods, including those used to control |
| 10 |                |                      |                                                                   |
| 11 | methods        |                      | for confounding                                                   |
| 12 |                |                      |                                                                   |
| 13 |                |                      |                                                                   |
| 14 | Statistical    | <a href="#">#n/a</a> | Describe any methods used to examine subgroups and                |
| 15 |                |                      |                                                                   |
| 16 | methods        |                      | interactions                                                      |
| 17 |                |                      |                                                                   |
| 18 |                |                      |                                                                   |
| 19 | Statistical    | <a href="#">#4</a>   | Explain how missing data were addressed                           |
| 20 |                |                      |                                                                   |
| 21 | methods        |                      |                                                                   |
| 22 |                |                      |                                                                   |
| 23 |                |                      |                                                                   |
| 24 |                |                      |                                                                   |
| 25 | Statistical    | <a href="#">#4</a>   | If applicable, describe analytical methods taking account of      |
| 26 |                |                      |                                                                   |
| 27 | methods        |                      | sampling strategy                                                 |
| 28 |                |                      |                                                                   |
| 29 |                |                      |                                                                   |
| 30 | Statistical    | <a href="#">#n/a</a> | Describe any sensitivity analyses                                 |
| 31 |                |                      |                                                                   |
| 32 | methods        |                      |                                                                   |
| 33 |                |                      |                                                                   |
| 34 |                |                      |                                                                   |
| 35 |                |                      |                                                                   |
| 36 | <b>Results</b> |                      |                                                                   |
| 37 |                |                      |                                                                   |
| 38 |                |                      |                                                                   |
| 39 | Participants   | <a href="#">#n/a</a> | Report numbers of individuals at each stage of study—eg           |
| 40 |                |                      |                                                                   |
| 41 |                |                      | numbers potentially eligible, examined for eligibility, confirmed |
| 42 |                |                      |                                                                   |
| 43 |                |                      | eligible, included in the study, completing follow-up, and        |
| 44 |                |                      |                                                                   |
| 45 |                |                      | analysed. Give information separately for for exposed and         |
| 46 |                |                      |                                                                   |
| 47 |                |                      | unexposed groups if applicable.                                   |
| 48 |                |                      |                                                                   |
| 49 |                |                      |                                                                   |
| 50 |                |                      |                                                                   |
| 51 |                |                      | Note it was cross-sectional study                                 |
| 52 |                |                      |                                                                   |
| 53 |                |                      |                                                                   |
| 54 | Participants   | <a href="#">#n/a</a> | Give reasons for non-participation at each stage                  |
| 55 |                |                      |                                                                   |
| 56 |                |                      |                                                                   |
| 57 |                |                      | Note: all participants participated                               |
| 58 |                |                      |                                                                   |
| 59 |                |                      |                                                                   |
| 60 |                |                      |                                                                   |

|                                                          |                  |                      |                                                                                                                                                                                                                   |
|----------------------------------------------------------|------------------|----------------------|-------------------------------------------------------------------------------------------------------------------------------------------------------------------------------------------------------------------|
| 1<br>2<br>3<br>4<br>5<br>6                               | Participants     | <a href="#">#n/a</a> | Consider use of a flow diagram<br><br>Note: it was just at one study.                                                                                                                                             |
| 7<br>8<br>9<br>10<br>11<br>12<br>13<br>14<br>15<br>16    | Descriptive data | <a href="#">#5</a>   | Give characteristics of study participants (eg demographic, clinical, social) and information on exposures and potential confounders. Give information separately for exposed and unexposed groups if applicable. |
| 17<br>18<br>19<br>20<br>21<br>22<br>23<br>24<br>25       | Descriptive data | <a href="#">#n/a</a> | Indicate number of participants with missing data for each variable of interest<br><br>Note: there was no missed data due to different interests.                                                                 |
| 26<br>27<br>28<br>29<br>30<br>31<br>32<br>33<br>34<br>35 | Outcome data     | <a href="#">#6</a>   | Report numbers of outcome events or summary measures.<br><br>Give information separately for exposed and unexposed groups if applicable.                                                                          |
| 36<br>37<br>38<br>39<br>40<br>41<br>42<br>43<br>44<br>45 | Main results     | <a href="#">#11</a>  | Give unadjusted estimates and, if applicable, confounder-adjusted estimates and their precision (eg, 95% confidence interval). Make clear which confounders were adjusted for and why they were included          |
| 46<br>47<br>48<br>49<br>50                               | Main results     | <a href="#">#n/a</a> | Report category boundaries when continuous variables were categorized                                                                                                                                             |
| 51<br>52<br>53<br>54<br>55<br>56                         | Main results     | <a href="#">#n/a</a> | If relevant, consider translating estimates of relative risk into absolute risk for a meaningful time period                                                                                                      |
| 57<br>58<br>59<br>60                                     | Other analyses   | <a href="#">#10</a>  | Report other analyses done—e.g., analyses of subgroups and                                                                                                                                                        |

interactions, and sensitivity analyses

## Discussion

- Key results [#12](#) Summarise key results with reference to study objectives
- Limitations [#13](#) Discuss limitations of the study, taking into account sources of potential bias or imprecision. Discuss both direction and magnitude of any potential bias.
- Interpretation [#13](#) Give a cautious overall interpretation considering objectives, limitations, multiplicity of analyses, results from similar studies, and other relevant evidence.
- Generalisability [#13](#) Discuss the generalisability (external validity) of the study results
- Other Information
- Funding [#14](#) Give the source of funding and the role of the funders for the present study and, if applicable, for the original study on which the present article is based

None The STROBE checklist is distributed under the terms of the Creative Commons Attribution License CC-BY. This checklist can be completed online using <https://www.goodreports.org/>, a tool made by the [EQUATOR Network](#) in collaboration with [Penelope.ai](#)

# BMJ Open

## Delays in Emergency Obstetrics referrals in Addis Ababa hospitals: a facility-based, cross-sectional study

|                                 |                                                                                                                                                                                                            |
|---------------------------------|------------------------------------------------------------------------------------------------------------------------------------------------------------------------------------------------------------|
| Journal:                        | <i>BMJ Open</i>                                                                                                                                                                                            |
| Manuscript ID                   | bmjopen-2019-033771.R1                                                                                                                                                                                     |
| Article Type:                   | Original research                                                                                                                                                                                          |
| Date Submitted by the Author:   | 07-Jan-2020                                                                                                                                                                                                |
| Complete List of Authors:       | Assefa, Endalkachew; Addis Ababa University College of Health Sciences, obstetrics and gynecology<br>Berhane, Yemane ; Addis Continental Institute of Public Health,                                       |
| <b>Primary Subject Heading</b>: | Obstetrics and gynaecology                                                                                                                                                                                 |
| Secondary Subject Heading:      | Obstetrics and gynaecology, Evidence based practice, Health services research                                                                                                                              |
| Keywords:                       | Human resource management < HEALTH SERVICES ADMINISTRATION & MANAGEMENT, Health policy < HEALTH SERVICES ADMINISTRATION & MANAGEMENT, Quality in health care < HEALTH SERVICES ADMINISTRATION & MANAGEMENT |
|                                 |                                                                                                                                                                                                            |

SCHOLARONE™  
Manuscripts

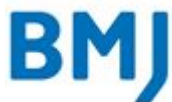

I, the Submitting Author has the right to grant and does grant on behalf of all authors of the Work (as defined in the below author licence), an exclusive licence and/or a non-exclusive licence for contributions from authors who are: i) UK Crown employees; ii) where BMJ has agreed a CC-BY licence shall apply, and/or iii) in accordance with the terms applicable for US Federal Government officers or employees acting as part of their official duties; on a worldwide, perpetual, irrevocable, royalty-free basis to BMJ Publishing Group Ltd ("BMJ") its licensees and where the relevant Journal is co-owned by BMJ to the co-owners of the Journal, to publish the Work in this journal and any other BMJ products and to exploit all rights, as set out in our [licence](#).

The Submitting Author accepts and understands that any supply made under these terms is made by BMJ to the Submitting Author unless you are acting as an employee on behalf of your employer or a postgraduate student of an affiliated institution which is paying any applicable article publishing charge ("APC") for Open Access articles. Where the Submitting Author wishes to make the Work available on an Open Access basis (and intends to pay the relevant APC), the terms of reuse of such Open Access shall be governed by a Creative Commons licence – details of these licences and which [Creative Commons](#) licence will apply to this Work are set out in our licence referred to above.

Other than as permitted in any relevant BMJ Author's Self Archiving Policies, I confirm this Work has not been accepted for publication elsewhere, is not being considered for publication elsewhere and does not duplicate material already published. I confirm all authors consent to publication of this Work and authorise the granting of this licence.

1  
2  
3 Delays in Emergency Obstetrics referrals in Addis Ababa hospitals: a facility-based, cross-  
4 sectional study  
5

6 Endalkachew Mekonnen Assefa<sup>1</sup>, Yemane Berhane<sup>2</sup>  
7

8  
9 **Abstract**

10  
11 **Objectives:** To assess where the delays occur in the referral chain at most and maternal health  
12 outcomes based on the three delay model in Addis Ababa.  
13

14  
15 **Design:** This study was a facility-based cross sectional study

16  
17 **Setting:** Two public and tertiary hospitals in Addis Ababa

18  
19 **Participants:** All pregnant women who were referred for only labor and delivery services after 28 weeks  
20 of gestation between December 2018 and February 2019 in Zewditu and Gandhi Memorial hospitals.  
21

22  
23 **Primary and secondary outcome measures:** The primary outcome was the type of delays from the  
24 three-delay model which met operationally defined time. Maternal health outcomes based on the  
25 three-delay model was secondary outcome.  
26

27  
28 **Results:** A total of 403 pregnant women referred for delivery to the study hospitals were included in  
29 the study. Three-fourth (301, 74.7%) of referred pregnant women had the third delay (delayed receiving  
30 appropriate care); (211, 52.4%) had first delay (delay in making decision to seek care). Overall  
31 366(90.8%) pregnant women had experienced at least one of the three delays and 71(17.6%) had all the  
32 three delays. Twenty-nine (7.2%) referred women had severe maternal outcomes (SMO). The most  
33 leading causes/diagnosis of SMO were blood transfusion 17 (58.6%) followed by post partum  
34 hemorrhage 15 (52%) then eclampsia 9 (31%). In addition, women who experienced severe maternal  
35 outcomes were 2.9 times more likely to have at least one of the three delays.  
36  
37

38  
39 **Conclusion & recommendation:** This study highlights the persistence of delays at all levels and  
40 especially delay three and its contribution to the severe maternal outcomes. Strengthening health  
41 referral systems and addressing specific health system bottlenecks during labor and birth in order to  
42 ensure no mother will be endanger. We also recommend a qualitative method of study (focus group  
43 discussion and in-depth interview) and observing the tertiary hospitals set-up and readiness to manage  
44 obstetrics emergencies.  
45  
46  
47  
48  
49  
50

51 **Key words:** Addis Ababa, Emergency obstetrics referral, severe maternal outcomes, Three-delay model  
52  
53  
54  
55  
56  
57  
58  
59  
60

## Article summary

### Strengths and limitations

- This study gives the extent of delays and severe maternal outcomes experienced by women who were referred for labor and delivery
- This study focused on women with severe maternal outcomes (SMO) rather than less severe forms of obstetric complications because their situations are the closest to maternal deaths.
- Women after delivery might be missed if they transferred to health centers and to other hospitals after delivery for different reasons.
- The results might not be representative of other institutions and the community because it was conducted in two referral hospitals which often receive and treat complicated cases.

## Introduction

The majority of maternal deaths are clustered around labour, delivery and the 24 hours postpartum (1),(2). It is estimated that just five conditions (postpartum hemorrhage; puerperal sepsis; preeclampsia and eclampsia; obstructed or prolonged labour, and complications of unsafe abortion), account for at least 60% of all maternal mortality (3). Life-threatening situations may develop rapidly and without warning, often in previously uncomplicated pregnancies(4).

Globally, it is recognized that significant inroads in maternal mortality cannot be made without dramatically increasing access to emergency obstetrical care (EmOC). The World Health Organization estimates that at least 88–98% of maternal deaths can be averted with timely access to existing, emergency obstetric interventions (5). This produces a triple return on investment, saving women and newborns and preventing stillbirths(6).

A number of factors can influence a woman's ability to access effective interventions to treat complications in the event of an obstetric emergency. Thaddeus and Maine (1994) group these into three broad categories using a classic, pathways-based framework known as the 'three delays model'(7). The 'three delays model' attempts to explain delays in women accessing emergency obstetric care as the result of: 1) decision-making, 2) accessing services and 3) receipt of appropriate care once a health facility is reached.

Referral is often associated with the second delay of the three delays model– associated with reaching the appropriate level of care. But in fact, a referral system can reduce all three delays. If a population knows that a system is reliable and affordable, families may make the decision to seek care more quickly (the first delay(8)).

The major obstacles that affect the referral system reported by both the health workers and women were: 1) financial barriers (for transportation and service payments at health facilities), 2) lack of means of transportation, 3) distance, and 4) lack of awareness of services and the importance of services (9).

Factors associated with health seeking behavior are multidimensional. Socio-cultural and economic problems, lack of awareness, the quality of health services, and infrastructure such as transport services all affect whether and where a woman will seek care, how long it will take to reach care, and whether she receives the appropriate care in a timely fashion(10).

Studies showed referrals in pregnancy and childbirth can be (1) institutional or self-referral, depending on the involvement of first line services; (2) antenatal, delivery or postnatal referral; and (3) elective or emergency referral. Pregnant women may be referred due to demographic risks, obstetric historical risks, prenatal complications and delivery and immediate postnatal complications(11). On the other hand, studies show that high risk prediction may not necessarily mean that the woman will have a complication and many women identified as being at risk go on to have normal deliveries(12).



1  
2  
3 Defining a framework and process for obstetric referrals may lead to reduction of maternal mortality  
4 and morbidity. Referral should be broadly defined to include not only transport, but it should be timely  
5 referral to minimize or prevent the delay for transportation (called second delay), and ensure pre-  
6 hospital care while transporting a patient to the referral facility(13), (14).

7  
8  
9 It is widely accepted that substantial reductions in maternal mortality and severe morbidity are  
10 impossible to achieve without early decision-making to seek care, an effective referral system for  
11 complicated cases and receiving timely and appropriate care (9), (15) .

12  
13  
14 The objective of this study was to determine the types of delay and maternal health outcomes based on  
15 the three delay model among women who referred for labor and delivery. Results from this study may  
16 be an input for the hospitals, health bureau, policy-makers and other stakeholders to act on bottle-  
17 necks of emergency obstetrics services by identifying the most common types of delay.

## 18 19 20 **Methods**

21  
22 We used the STROBE cross sectional reporting guidelines (16).

## 23 24 **Study design**

25  
26 A facility based cross-sectional study was conducted between December 10/2018-February 28/2019 in  
27 two government hospitals Zewditu Memorial Hospital (ZMH) and Gandhi Memorial Hospitals (GMH).

## 28 29 30 **Study setting**

31  
32 This study conducted in tertiary hospitals located in capital city of Ethiopia, Addis Ababa. Both hospitals  
33 are under Addis Ababa Health Bureau and affiliated with Addis Ababa University College of Health  
34 Sciences. Gandhi Memorial Hospital is a referral maternity hospital and Zewditu Memorial Hospital is  
35 also a comprehensive referral hospital. Both hospitals have 40 (forty) health centers under them  
36 allocated by Ministry of Health and other health facilities which can refer to them. Both hospitals are  
37 giving Comprehensive emergency obstetrics care (CEmOC) and attending more than 17,000 deliveries  
38 per a year.

39  
40  
41 The referral system for obstetric emergency in Addis Ababa is organized to include Basic Emergency  
42 obstetric care (BEmOC) facilities and CEmOC facilities. The referral system is developed to work both  
43 ways. Referral between facilities is facilitated by the liason office or Maternal Health Task Force. An  
44 ambulance system is organized to transport women which should be accompanied by midwives. The  
45 midwife provides care during transportation and hand-over the mother to the receiving hospital care  
46 provider with a referral paper. In the city, all maternity services including labour/delivery and the  
47 ambulance services are provided free of charge in all government health facilities.

## 48 49 50 51 52 53 54 55 56 **Eligibility criteria**

1  
2  
3 All pregnant women who were referred for only labor and delivery services after 28 weeks of gestation  
4 or baby outcome  $\geq 1$  kg and delivered in the selected hospitals, and also who gave consent were  
5 included.  
6

### 7 **Data Collection Tools**

8  
9 After they gave birth, women were identified and interviewed from emergency OPD, labor ward and in-  
10 patient wards every day before they discharged from the hospital by data collectors using pretested and  
11 structured questionnaires.  
12  
13

### 14 **Data collection Procedures**

15  
16 The referral papers reviewed and date, time and diagnosis of referral were recorded for each mother.  
17 The triage paper and patient chart are also reviewed including mode of transportation, date and time of  
18 arrival, sources of referrals, obstetrics performances, the time taken to admit/get the service after  
19 arrival, diagnosis at receiving hospital, gestational age, place and mode of delivery, newborn outcomes  
20 and severe maternal complications types and managements. Women interviewed on socio-demographic  
21 characteristics, time interval to seek medical advice and reason of delay to seek the care (if there was).  
22  
23

24  
25 The completed questionnaires were reviewed by principal investigator and supervisors. Incomplete  
26 questionnaires were filled if the women were not discharged; otherwise incomplete questionnaires  
27 were discarded.  
28

### 29 **Main outcomes and measures of the study**

30  
31 The three delays time frame were operationally defined through a consultative process involving six  
32 obstetrician & gynecologists (three from each hospitals) who had working experience of 7-20 years in  
33 the selected hospitals. Accordingly, first delay defined time elapsed between the recognition of  
34 complication/s, and the decision to transport and reach to a health facility, was considered if it took  
35 more than 60 minutes. The second delay was defined if the mother did not reach to referral hospitals  
36 within 60 minutes of referral. The third delay was if the mother didn't receive care or admitted within 30  
37 minutes. Severe maternal outcomes were any maternal complications including blood transfusion (any  
38 type & units), Post-partum hemorrhage, shock, eclampsia, uterine rupture, pulmonary edema,  
39 laparotomy, laboratory evidences of organ damage and maternal death during the process of delivery  
40 and/or before discharge from the hospital. Potentially life threatening maternal conditions (PLTMC) was  
41 considered when the mother had at least one of the following; hemorrhagic complications, hypertensive  
42 disorders and complications, end organ injury, blood product transfusion, ICU admission, uterine  
43 rupture, hysterectomy/laparotomy.  
44  
45  
46  
47  
48

49 **Sample size:** Single proportion formula used by assuming 50% of the referred women have delay ,  
50 degree of precision of 5% (d) , confidence interval of 95% (Z=1.96), assuming 5% non-response rate and  
51 the final sample size was 403 .  
52  
53  
54  
55  
56  
57  
58  
59  
60

### Statistical analysis

Data were entered in epi-info version 7.2.2.6 and transported to SPSS Version-21 statistics software for cleaning and analysis. Descriptive statistical were used to present women by their socio-demographic characteristics, referral diagnosis, diagnosis at receiving hospitals, obstetrics characteristics, mode of delivery, newborn outcomes, the three delays, and severe maternal outcomes. Severe maternal outcomes were analyzed for the three delays. The relationship between the three delays and SMO were examined using the multivariate logistic regression. The goodness of the model was tested by Hosmer-Lemeshow test for goodness-of-fit. Selected variables were included in the model to account for maternal characteristics differences other than delays in seeking and receiving care.

### Ethical issues

Ethical clearance was obtained from both Addis Continental Institute of Public Health (ACIPH) and Addis Ababa Health Bureau (AAHB) Institution Review Board (IRB). Support letters were written to both study hospitals from AAHB-IRB to gain access.

### Patient and public involvement:

Women asked for some questions after obtained informed consent on voluntary basis. All the responses given by the participants and the results obtained kept anonymous and confidential. There was no public involvement in the design, conduct and interpretation of the study. Patients were not asked to advise on interpretation or writing up of results. We did not include patient involvement in the design of this study .We have presented a summary of the findings at medical and public health schools and among health providers in Addis Ababa and plan to continue presenting the results at professional society's conferences. Results were shared with administrative of both selected hospitals and Addis Ababa health Bureau to facilitate improved obstetrics services. There are no plans to disseminate the results of this research to study participants.

### Results

Table 1 shows the descriptive information for socio-demographic and obstetrics characteristics of referred pregnant women. The mean age of 403 pregnant women referred for labor/delivery services was  $26.47 \pm 4.5$  years and ranged from 18 to 43. The majorities were married (380,94.3%), and have completed at least secondary school (54.3%).Majority women were primigravida (56.1%) , the mean gravidity was  $1.77 \pm 1.1$  and ranged between 1 to 7. Most pregnant women (58.8%) were at term pregnancy (37 weeks- 41w6d) (Table1).

Table 1.Socio-demographic and obstetrics characteristics of respondents, Addis Ababa, Ethiopia, 2019 (n=403)

| Characteristics n=403 | Number (%) |
|-----------------------|------------|
| Study Hospital        |            |

|                                            |            |
|--------------------------------------------|------------|
| Gandhi Memorial Hospital (GMH)             | 173 (42.9) |
| Zewditu Memorial Hospital (ZMH)            | 230 (57.1) |
| Age (years) median: 26 years (range 18-43) |            |
| < 20                                       | 32 (7.9)   |
| 20-25                                      | 158 (39.2) |
| 26-30                                      | 151 (37.5) |
| 31-35                                      | 46 (11.4)  |
| ≥36                                        | 16 (4.0)   |
| Marital status                             |            |
| Married                                    | 380 (94.3) |
| Others(unmarried, divorced)                | 23 (5.7)   |
| Educational level                          |            |
| No formal education                        | 49 (12.2)  |
| Primary school                             | 135 (33.5) |
| Secondary school                           | 117 (29.0) |
| Preparatory                                | 35 (8.7)   |
| Vocational and above                       | 67 (16.6)  |
| Gravidity n=403                            |            |
| 1                                          | 226 (56.1) |
| 2-4                                        | 165 (40.9) |
| ≥5                                         | 12 (3.0)   |
| Parity n=146                               |            |
| 1                                          | 90 (61.6)  |
| ≥2                                         | 56 (38.4)  |
| Abortion n=60                              |            |

|    |                 |            |
|----|-----------------|------------|
| 1  | 1               | 48 (80 )   |
| 2  |                 |            |
| 3  | ≥ 2             | 12 (20)    |
| 4  |                 |            |
| 5  |                 |            |
| 6  |                 |            |
| 7  | Gestational age |            |
| 8  |                 |            |
| 9  | 28-33w6d        | 9(2.2)     |
| 10 |                 |            |
| 11 | 34-36w6d        | 22 (5.5)   |
| 12 |                 |            |
| 13 | 37-41w6d        | 237 (58.8) |
| 14 |                 |            |
| 15 | ≥ 42            | 42 (10.4)  |
| 16 |                 |            |
| 17 | Unknown         | 93 (23.1)  |
| 18 |                 |            |
| 19 |                 |            |
| 20 |                 |            |

The majority of the pregnant women were referred from health centers (387, 96%) and transported by the ambulance (72%) (table 2).

The majority of the women delivered through vaginal route (254, 63.3%) followed by Cesarean-section (148, 36.7%). The most common indication for C-section were non-reassuring fetal heart rate pattern (27 %) followed by cephalo-pelvic disproportion/malpresentation/malposition (24.3%) then meconium staining in latent first stage of labor (22.3%).The majority of the babies were born alive (389, 96.5%). There were eight (2%) intra-partum fetal losses (Table 2).

Table 2. Source of referral, transportation, mode & place of delivery and perinatal outcome, among referred pregnant women for delivery, Addis Ababa, Ethiopia, 2019.

| Characteristics                                        | Number (%) |
|--------------------------------------------------------|------------|
| Source of referral N=403                               |            |
| Health Center                                          | 387 (96.0) |
| Others                                                 | 16 (4.0)   |
| Transportation                                         |            |
| Ambulance                                              | 290 (72)   |
| Others( Taxi, personal car)                            | 113 (28)   |
| Receiving hospital contacted before the women referred |            |
| Yes                                                    | 157 (39.0) |

No 246 (61.0)

---

**Mode of delivery**


---

|                          |            |
|--------------------------|------------|
| Vaginal delivery         | 229 (56.8) |
| Assisted breech delivery | 4 (1.0)    |
| C-section                | 148 (36.7) |
| Instrumental delivery    | 21(5.2)    |
| Vacuum                   | 16 (4.0)   |
| Forceps                  | 5 (1.2)    |
| Laparotomy               | 1 (0.2)    |

---

**C-section indication N=148**


---

|                                              |           |
|----------------------------------------------|-----------|
| Non-reassuring fetal heart rate (NRFHR)      | 40 (27.0) |
| Meconium in LFSOL                            | 33 (22.3) |
| Cephalopelvic disproportion (CPD)            | 21 (14.2) |
| Malpresentation/malposition                  | 15 (10.1) |
| Previous C-scar with labor/labor abnormality | 10 (6.8)  |
| Cord prolapse/presentation                   | 7 (4.7)   |
| Non reassuring biophysical profile (NRBPP)   | 5 (3.4)   |
| APH                                          | 4 (2.7)   |
| Others                                       | 13(8.8)   |

---

**Place of delivery N=403**


---

|                           |            |
|---------------------------|------------|
| Labor ward/Operation room | 386 (95.8) |
| Emergency OPD             | 17 (4.2)   |

---

**Outcome N=403**


---

|                          |              |
|--------------------------|--------------|
| Alive                    | 389 (96.5)   |
| Newborn referred to NICU | Yes 137 (34) |

|                                      |    |            |
|--------------------------------------|----|------------|
|                                      | No | 252 (62.5) |
| Stillbirth                           |    | 14 (3.5)   |
| Fetal heart beat positive on arrival |    | 8(2.0)     |
| Fetal heart beat negative on arrival |    | 6(1.5)     |

Among 403 referred women for childbirth, 71(17.6%) women experienced all the three delays. Almost three-fourth referred women (74.7%) experienced third delay followed by first delay (52.4%). Majority (366, 90.8%) women had at least one of the delays (Table 3).

Table 3. The frequency of the three delays among referred women, Addis Ababa, Ethiopia 2019.

| Characteristics    | Number (%) |            |
|--------------------|------------|------------|
|                    | Yes        | No         |
| N=403              |            |            |
| First delay        | 211 (52.4) | 192 (47.6) |
| Second delay       | 163 (40.4) | 240(59.6)  |
| Third delay        | 301(74.7)  | 102(25.3)  |
| At least one delay | 366 (90.8) | 37 (9.2)   |
| All three delay    | 71 (17.6)  | 332 (82.4) |

\*\* multiple answer possible

Twenty-nine (7.2%) women had severe maternal outcomes. The most common severe maternal outcome was blood transfusion (58.6%) followed by post partum hemorrhage (51.7%) then eclampsia (31%). Nearly three-fourth women with SMO (78.5%) had more than one complication (Figure1).

The most common delays in women with SMO were third delay (58.6%) followed by first delay (51.7%). All most three-fourth women experienced at least one of the delays (79.3%) and one-quarter (24.1%) women had all the delays (table 4).

Statistically significant association was observed between SMO and third delay, at least one of the delays. Referred women with the third delay had 2.2 times (95% CI of 1.025-4.840) more likely to be a risk for severe maternal outcomes. Women who experienced at least one of the delays had 2.9 times (95% CI 1.093-7.620) more likely to be a risk for severe maternal outcomes (table 4).

After adjusted for age, gravidity, parity, educational level and marital status none of the delays were significant. This may be due to small sample of women with SMO. Also the three delays were not significant for age, gravidity, parity, educational level, gestational age and marital status.

Table 4. SMO and types of delays Addis Ababa, Ethiopia 2019.

| Characteristics    | Severe maternal outcomes |             | P-value   | COR 95 % CI                            |
|--------------------|--------------------------|-------------|-----------|----------------------------------------|
|                    | No                       | Yes         |           |                                        |
| Types of delay     | Number (%)               | Number (%)  |           |                                        |
| First delay        | No                       | 178 (47.6%) | 14 (48.3) |                                        |
|                    | Yes                      | 196 (52.4)  | 15 (51.7) | <b>0.944</b> <b>1.028(0.483-2.189)</b> |
| Second delay       | No                       | 224 (59.9)  | 16 (55.2) |                                        |
|                    | Yes                      | 150 (40.1)  | 13 (44.8) | <b>0.618</b> <b>1.213(0.567-2.596)</b> |
| Third delay        | No                       | 90(24.1)    | 12 (41.4) |                                        |
|                    | Yes                      | 284 (75.9)  | 15 (58.6) | <b>0.043</b> <b>2.227(1.025-4.840)</b> |
| All delays         | No                       | 310 (82.9)  | 22 (75.9) |                                        |
|                    | Yes                      | 64 (17.1)   | 7 (24.1)  | <b>0.342</b> <b>1.541(0.632-3.761)</b> |
| At least one delay | No                       | 31 (8.3)    | 6 (20.7)  |                                        |
|                    | Yes                      | 343 (91.7)  | 23(79.3)  | <b>0.032</b> <b>2.889(1.093-7.620)</b> |

\*\*AOR not significant after adjusted for age, marital status, educational level, gestational age, gravidity, parity.

Eighty (19.9%) of referred women had at least one potential life threatening conditions (PLTC). The most common complications was hypertensive disorders 56 (70%) followed by blood transfusion 17 (21.3%) then post partum hemorrhage (table 5).

Table 5. Potentially life threatening conditions among referred women Addis Ababa, Ethiopia, 2019

| Characteristics* N=80 | Number (%) |
|-----------------------|------------|
|-----------------------|------------|



| <b>Hemorrhagic complications</b>          |           |
|-------------------------------------------|-----------|
| Ante partum hemorrhage (AP,PP)            | 13 (16.3) |
| Post partum hemorrhage (PPH)              | 15 (18.8) |
| Ruptured uterus                           | 1 (1.25)  |
| Coagulopathy                              | 2 (2.5)   |
| <b>Hypertensive disorders</b>             |           |
| Severe hypertension/Preeclampsia          | 50 (62.5) |
| Eclampsia                                 | 9 (11.3)  |
| HELLP syndrome                            | 2 (2.5)   |
| <b>Others</b>                             |           |
| Pulmonary edema                           | 1 (1.25)  |
| Shock                                     | 1(1.25)   |
| Thrombocytopenia                          | 2 (2.5)   |
| <b>Management indication of severity</b>  |           |
| Transfusion of blood derivatives          | 17 (21.3) |
| Major surgical intervention(hysterectomy) | 1(1.25)   |

\*Multiple response possible

## Discussion

All three types of delay were common in maternity services in the study hospitals; the most severe being the delay within the receiving hospital. The third delay was significantly associated with severe maternal outcomes.

Studies have found that distance to facilities is a clear barrier to women accessing health facilities (17) (18) but in Addis Ababa, proximity to services does not appear to be a problem, as the median distance to a facility that provides surgical services is 5 kilometers, well below the national average of 45 kilometers (19). Two-fifth of women had the second delay. When we compare with other studies it may be low however this proportion of the second delay is not expected because referring

1  
2  
3 facilities/catchment health centers are near to the receiving hospitals and expected to refer by  
4 ambulance (20).  
5

6  
7 This study showed the rate of occurrence of SMO indicators were higher than the findings of an earlier  
8 study done in other parts of the country (20) (21) (22) (23) and other countries (24-26). This high  
9 proportion SMO might be due to the fact that our study selected facilities are referral hospitals which  
10 are serving complicated cases and cases referred from other health facilities which were beyond their  
11 capacity/needed further interventions. This study showed that direct obstetric causes were the most  
12 common leading factors of SMO and the most common diagnosis were postpartum hemorrhage (52%)  
13 followed by eclampsia (31%) and the most common intervention was blood transfusion (58.6%).  
14 Obstetric hemorrhage and hypertensive disorders (eclampsia, hematological coagulation, and  
15 pulmonary edema) were found to be the top underlying complications among cases of SMO; similarly,  
16 hypertensive disorders and obstetric hemorrhage were the most common underlying causes of PLTC.  
17 This is comparable to the findings from studies in other parts of the country (21), (22) (23) and other  
18 countries (25-29) including sub-Saharan countries (30) (31).  
19  
20  
21  
22

23  
24 Emergency obstetric care use by pregnant women is influenced by a complex interaction of factors  
25 leading to delay in decision-making, accessing services and receipt of proper care once a health facility is  
26 reached(30) (31). Receiving appropriate care after reaching at the health facility (delay three) was the  
27 most common (58.6%) followed by delay in seeking care (delay one) (51.7%) then reaching at the  
28 appropriate health facility (delay two) (44.8%) were identified among SMO and more than half of  
29 (58.6%) SMO cases had encountered at least one of the delays which were similar to study done  
30 elsewhere in the country (21) (32) (33); however delay two and one is seen less frequently than the  
31 findings from other countries (25) (30) (31) (34-37). This can be justified by overloaded of cases, limited  
32 hospitals capacity, a difference in socio-demographic characteristics of the study population and the  
33 proximity of health facilities.  
34  
35

36  
37 In this study, failure to receiving appropriate care after reaching at the health facility (delay three) was  
38 found to have the strongest association with SMO: with a two-fold increase in the risk. This supports the  
39 WHO hypothesis relating a high case fatality in the hospital as an indicator for the presence of delay in  
40 receiving an adequate and proper treatment (38) and it indicates the poor performance of obstetrics  
41 services (39) (40). Seeking care from a facility that is incapacitated health facility and system, poor  
42 leadership (mismanagements of hospital resources, poor co-ordinations and lack of understanding of  
43 obstetrics emergencies) contribute to significant delay after reaching the health facility. These factors  
44 were reported as significant contributors to delay in several studies (21) (32) (34) (35). Studies from  
45 Tigray, 88% of all maternal deaths were attributed to health system failure (33). In our study, 59 % of  
46 SMO cases and both maternal deaths (MD) had health system related factors as a possible reason for  
47 delay three.  
48  
49  
50

51  
52 The limitation of this study include that it was conducted in two referral hospitals which often receive  
53 complicated cases and referred mother with complications; and the results might not be representative  
54 of other institutions and the community. In addition, cases might be missed because if they transferred  
55 to health centers and other hospitals after delivery for different reasons.  
56  
57

1  
2  
3 However, we believe that this study gives the extent of delays and SMO & its indicators experienced by  
4 women who were referred for an emergency delivery. In fact, if the delay is so severe in these well-  
5 established referral centers one may expect it to be worse in some not well staffed and equipped  
6 centers. We decided to focus on women with severe maternal outcomes (SMO) rather than less severe  
7 forms of obstetric complications because their situations are the closest to maternal deaths.  
8  
9

## 10 **Conclusion**

11  
12 The burden of severe maternal outcomes (SMO) is high due to preventable and/or treatable direct  
13 obstetric. The majority of the women in this study had serious delays in both making decision to seek  
14 care for birthing and in actually receiving care once at a hospital. We recommend strengthening health  
15 referral systems and addressing specific health systems bottlenecks during labor and birth in order to  
16 ensure no mother will be endangered. We also recommend a qualitative method of study (including  
17 focus group discussion, in-depth interview) and observing the tertiary hospitals set-up and  
18 readiness to manage high-risk pregnancies.  
19  
20  
21  
22

## 23 **Abbreviations**

24 AAHB-IRB: Addis Ababa Health Bureau-Institutional Review Board

25 BEmOC: Basic Emergency Obstetrics Care

26 CEmOC: Comprehensive Emergency Obstetrics Care

27 GMH: Gandhi Memorial Hospital

28 HELLP: Hemolysis, Elevated liver enzyme, Low Platelets

29 ICU: Intensive Care Unit

30 LW: Labor Ward

31 MD: Maternal Death Ratio

32 MNM: Maternal Near-Miss

33 MWH: Maternity Waiting Home

34 OPD: Out-Patient Department

35 PIH: Pregnancy Induced Hypertension

36 PLTC: Potential Life Threatening Conditions

37 PPH: Post Partum Hemorrhage

38 SMO: Severe Maternal Outcomes  
39  
40  
41  
42  
43  
44  
45  
46  
47  
48  
49  
50  
51  
52  
53  
54  
55  
56  
57  
58  
59  
60

1  
2  
3 WHO: World Health Organization  
4

5 ZMH: Zewditu Memorial Hospital  
6

### 7 **Acknowledgments**

8 We would like to thank residents and Interns of Addis Ababa University-College of Health sciences:  
9 without their support on data collection this research may not be reach to this stage.  
10  
11  
12  
13

### 14 **Author details**

15  
16 <sup>1</sup>Endalkachew Mekonnen Assefa (MD, MPH), Addis Ababa University-College of Health Sciences  
17 Department of Obstetrics and Gynecology; e-mail-[endmekon@gmail.com](mailto:endmekon@gmail.com); phone no. +251-913605674:  
18 corresponding author  
19

20  
21 <sup>2</sup>Yemane Berhane (MD, PhD), Addis Continental Institute of Public Health; [yemaneberhane@gmail.com](mailto:yemaneberhane@gmail.com)  
22

23 **Contributors:** EMA did design of the work, drafting the work, analysis, interpretation of data for the  
24 work and write-up the manuscript. YB advised the paper's scope, the draft of manuscript and did  
25 revising it critically for important intellectual content. Both authors approved the final version.  
26  
27

28 **Conflict of interest:** None declared  
29

30 **Source of funding:** 'This research received no specific grant from any funding agency in the public,  
31 commercial or not-for-profit sectors'.  
32

33 **Ethics approval:** Ethical approval was received from both Addis Continental Institute of Public Health  
34 and Addis Ababa Health Bureau ethical review board.  
35  
36

37 **Data availability statement:** data are available from the corresponding author upon reasonable  
38 request.  
39  
40  
41

### 42 **References**

- 43 1. Campbell O, Graham WJ. Measuring maternal mortality and morbidity: levels and trends. London:  
44 Lond Sch Hyg Trop Med. 1990;  
45  
46
- 47 2. Li XF, Fortney JA, Kotelchuck M, Glover LH. The postpartum period: the key to maternal mortality. Int  
48 J Gynaecol Obstet.1996;54:1–10.  
49  
50
- 51 3. Khan KS, Wojdyla D, Say L, Gulmezoglu AM, Van Look PF. WHO analysis of causes of maternal death: a  
52 systematic review.2006;Lancet 367:1066– 1074.  
53  
54  
55  
56  
57  
58  
59  
60

- 1  
2  
3 4. Fortney J. Emergency obstetric care: the keystone in the arch of safe motherhood. .; IJOG.  
4 2001;(74):95–97.  
5
- 6 5. World Health Organization (WHO). Maternal Mortality. Fact Sheet. Media Centre. 2016;  
7
- 8 6. World Health Organization (WHO). True magnitude of stillbirths and maternal and neonatal deaths  
9 underreported. Media Cent. 2016;  
10
- 11 7. Thaddeus S, Maine D. Too far to walk: maternal mortality in context. Soc Sci Med. 1994;38:1091–110.  
12
- 13 8. The Effectiveness of Emergency Obstetric Referral Interventions in Developing Country Settings: A  
14 Systematic Review [Internet]. [cited 2018 Jul 28]. Available from:  
15 <http://journals.plos.org/plosmedicine/article?id=10.1371/journal.pmed.1001264>  
16
- 17 9. Knight HE, Self A, Kennedy SH. Why Are Women Dying When They Reach Hospital on Time? A  
18 Systematic Review of the ‘Third Delay.’ PLoS ONE [Internet]. 2013 May 21 [cited 2018 Sep 7];8(5).  
19 Available from: <https://www.ncbi.nlm.nih.gov/pmc/articles/PMC3660500/>  
20
- 21 10. JSI Research and Training Institute. The Last 10 Kilometers (L10K). Emergency referral for pregnant  
22 women and newborns: A Rapid Community and Health System Assessment. BETA Development  
23 Consulting Firm, Addis Ababa. 2012 Jun;  
24
- 25 11. U. Onwudiegwu, O. C.Ezechi. Emergency obstetric admissions: late referrals, misdiagnoses and  
26 consequences. J J Obstet Gynaecol. 2001;Volume 21(Issue 6).  
27
- 28 12. Bossyns P, Abache R, Abdoulaye MS, Miyé H, Depoorter A-M, Van Lerberghe W. Monitoring the  
29 referral system through benchmarking in rural Niger: an evaluation of the functional relation between  
30 health centres and the district hospital. BMC Health Serv Res. 2006 Apr 12;6(1):51.  
31
- 32 13. Giovine A, Ostrowski C. Technical report on Improving Transportation and Referral for Maternal  
33 Health: Knowledge Gaps and Recommendations. Wilson Cent. 2010;  
34
- 35 14. Ronsmans C, Graham WJ, Lancet. Maternal Survival Series steering group: Maternal mortality: who,  
36 when, where, and why. Lancet. 2006;(368(9542)):1189–2000.  
37
- 38 15. Qureshi RN, Sikandar R, Hoodbhoy Z, Bano R, Jabeen N. Referral pattern of emergencies in  
39 obstetrics: Implications for defining scope of services and policy. JPMA J Pak Med Assoc.  
40 2016;66(12):1606–10.  
41
- 42 16. Von Elm E, Altman DG, Egger M, Pocock SJ, Gotsche PC, Vandenbroucke JP. The Strengthening the  
43 Reporting of Observational Studies in Epidemiology (STROBE) Statement: guidelines for reporting  
44 observational studies.  
45
- 46 17. McNamee P, Ternent L, Hussein J. Barriers in accessing maternal healthcare: evidence from low-and  
47 middle-income countries. Expert Rev Pharmacoecon Outcomes Res.2009;9(1):41–8.  
48  
49  
50  
51  
52  
53  
54  
55  
56  
57  
58  
59  
60

- 1  
2  
3 18. Gabrysch SC, Oona MR. Still to far to walk: Literature review of the determinants of derelivery service  
4 use. BMC Pregnancy Childbirth. 2009;9(34).<http://www.biomedcentral.com/1471-2393/9/34>.  
5  
6  
7 19. Federal Ministry of Health, Addis Ababa Regional Health Bureau. Emergency Obstetric and  
8 Newborn Care Services: Standard Operation Manual for Activities of Catchment Teams in Addis Ababa.  
9 2012.  
10  
11 20. Dile M, Abate T, Seyum T. Proportion of maternal near misses and associated factors in referral  
12 hospitals of Amhara regional state, Northwest Ethiopia: institution based cross sectional study.  
13 GynecolObstet (Sunnyvale). 2015; 5:308. <https://doi.org/10.4172/2161-0932.1000308>.  
14  
15  
16 21. Wondimagegnehu Sisay Woldeyes, Dejene Asefa and Geremew Muleta. Incidence and determinants  
17 of severe maternal outcome in Jimma University teaching hospital, south-West Ethiopia: a prospective  
18 cross-sectional study. Woldeyes Al BMC Pregnancy Childbirth 2018. 18:255(18:255).  
19  
20  
21 22. Gebrehiwot Y, Tewolde BT. Improving maternity care in Ethiopia through facility based review of  
22 maternal deaths and near misses. Int J GynecolObstet. 2014; 127:S29–34.  
23  
24 23. Liyew EF, Yalew AW, Afework MF, Esse. Incidence and causes of maternal near-miss in selected  
25 hospitals of Addis Ababa, Ethiopia. ONE. 2017;12(6):e0179013.  
26 <https://doi.org/10.1371/journal.pone.0179013>.  
27  
28  
29 24. Jabir M, et al. Maternal near miss and quality of maternal health care in Baghdad, Iraq. BMC  
30 Pregnancy Childbirth. 2013;13:11.  
31  
32 25. Leonardo Antonio Chavane, Patricia Bailey, Osvaldo Loquiha, Martinho Dgedge, Marc Aerts, and  
33 Marleen Temmerman. Maternal death and delays in accessing emergency obstetric care in  
34 Mozambique. BMC Pregnancy and Childbirth. (2018) 18:71 <https://doi.org/10.1186/s12884-018-1699-z>.  
35  
36  
37 26. Syeda B.Mazhar, AfshanBatoool, AngelaEmanuel, Arif T.Khan, ShireenBhutta. Severe maternal  
38 outcomes and their predictors among Pakistani women in the WHO Multicountry Survey on Maternal  
39 and Newborn Health. International Journal of Gynecology & Obstetrics Volume 129, Issue 1, April 2015,  
40 Pages 30-33.  
41  
42  
43 27. Özge Tunçalp, Michelle J. Hindin, Kwame Adu-Bonsaffoh, Richard M., Adanu. Assessment of  
44 maternal near-miss and quality of care in a hospital based study in Accra, Ghana. Int J Gynecol Obstet  
45 123 (2013) 58–63.  
46  
47  
48 28. Say L, Souza JP, Pattinson RC. WHO working group on Maternal Mortality and Morbidity  
49 classifications. Maternal near miss—towards a standard tool for monitoring quality of maternal health  
50 care. 2009. 23:287–96.  
51  
52  
53 29. Nelissen EJ, et al. Maternal near miss and mortality in a rural referral hospital in northern Tanzania: a  
54 cross-sectional study. BMC Pregnancy Childbirth. 2013;13:141.  
55  
56  
57  
58  
59  
60

- 1  
2  
3 30. Oladapo et al. When getting there is not enough: a nationwide cross-sectional study of 998 maternal  
4 deaths and 1451 near-misses in public tertiary hospitals in a low-income country.  
5 BJOG.2015.www.bjog.org.DOI: 10.1111/1471-0528.13450.  
6  
7  
8 31. Dan K Kaye, Othman Kakaire, and Michael O Osinde. Systematic review of the magnitude and case  
9 fatality ratio for severe maternal morbidity in sub-Saharan Africa between 1995 and 2010. BMC  
10 Pregnancy Childbirth. 2011;11(65).doi: 10.1186/1471-2393-11-65.  
11  
12 32. Ayele Geleto, Catherine Chojenta, Abdulbasit Musaand Deborah Loxton. Barriers to access and  
13 utilization of emergency obstetric care at health facilities in sub-Saharan Africa: a systematic review of  
14 literature. (2018) 7:183.https://doi.org/10.1186/s13643-018-0842-2.  
15  
16 33. Hailu S, Enqueselassie F, Berhane Y. Health facility-based maternal death audit in Tigray, Ethiopia.  
17 Ethiop J Health Dev. 2009; 23:115–9.  
18  
19 34. Rodolfo Carvalho Pacagnella, Jose Guilherme Cecatti, Maria Jose Osis & João, Paulo Souza. The role  
20 of delays in severe maternal morbidity and mortality: expanding the conceptual  
21 framework.Reproductive Health Matters 2012;20(39):155–163. www.rhm-elsevier.com.  
22 Doi:0.1016/S0968-8080(12)39601-8.  
23  
24 35. Rodolfo C Pacagnella, José G Cecatti, Mary A Parpinelli, Maria H Sousa, Samira M Haddad, Maria L  
25 Costa, João P Souza, Robert C Pattinson and the Brazilian Network for the Surveillance of Severe  
26 Maternal Morbidity, study group. Delays in receiving obstetric care and poor maternal outcomes: results  
27 from a national multicentre cross-sectional study.BMC Pregnancy and Childbirth 2014, 14:159.  
28  
29 36. Bouchra Assarag, Bruno Dujardin, Alexandre Delamou, Fatima-Zahra Meski,, Vincent De Brouwere.  
30 Determinants of Maternal Near-Miss in Morocco: Too Late, Too Far, Too Sloppy?PLOS ONE | January 22,  
31 2015.DOI:10.1371/journal.pone.0116675.  
32  
33 37. David M. Goodman, Emmanuel K. Srofenyoh, Adeyemi J. Olufolabi, Sung Min Kim and Medge D.  
34 wen. The third delay: understanding waiting time for obstetric referrals at a large regional hospital in  
35 Ghana:BMC Pregnancy and Childbirth (2017) 17:216; DOI 10.1186/s12884-017-1407-4.  
36  
37 38. World Health Organization. Evaluating the quality of care for severe pregnancy complications: the  
38 WHO near-miss approach for maternal health. Geneva: WHO; 2011.  
39  
40 39. Saira Yunus, Shahnaz Kauser, Shazia Ali. Three “Delays” as a framework for critical analysis of  
41 maternal near miss and maternal mortality.Journal of South Asian Federation of Obstetrics and  
42 Gynecology,May-August 2013;5(2):57-59.  
43  
44 40. Filippi V, Ronsmans C, Gohou V, et al. Maternity wards or emergency obstetric rooms? Incidence of  
45 near-miss events in African hospitals. Acta Obstetricia et Gynecologica Scandinavica 2005; 84(1):11–16.  
46  
47  
48  
49  
50  
51  
52  
53  
54  
55  
56  
57  
58  
59  
60

1  
2  
3 **Figure 1. Types of severe maternal outcomes among referred pregnant women, Addis Ababa,**  
4 **Ethiopia, 2019**  
5  
6  
7  
8  
9  
10  
11  
12  
13  
14  
15  
16  
17  
18  
19  
20  
21  
22  
23  
24  
25  
26  
27  
28  
29  
30  
31  
32  
33  
34  
35  
36  
37  
38  
39  
40  
41  
42  
43  
44  
45  
46  
47  
48  
49  
50  
51  
52  
53  
54  
55  
56  
57  
58  
59  
60

For peer review only



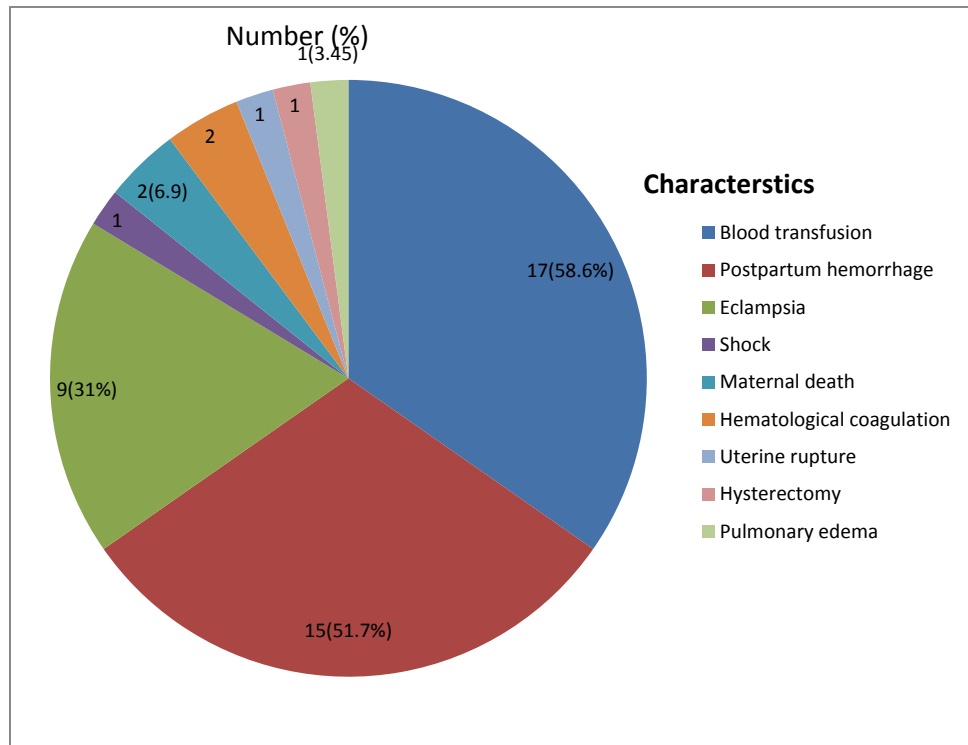

27  
28  
29  
30  
31  
32  
33  
34  
35  
36  
37  
38  
39  
40  
41  
42  
43  
44  
45  
46  
47  
48  
49  
50  
51  
52  
53  
54  
55  
56  
57  
58  
59  
60

Figure 1. Types of severe maternal outcomes among referred pregnant women, Addis Ababa, Ethiopia, 2019.

# Reporting checklist for cross sectional study.

Based on the STROBE cross sectional guidelines.

## Instructions to authors

Complete this checklist by entering the page numbers from your manuscript where readers will find each of the items listed below.

Your article may not currently address all the items on the checklist. Please modify your text to include the missing information. If you are certain that an item does not apply, please write "n/a" and provide a short explanation.

Upload your completed checklist as an extra file when you submit to a journal.

In your methods section, say that you used the STROBE cross sectional reporting guidelines, and cite them as:

von Elm E, Altman DG, Egger M, Pocock SJ, Gotsche PC, Vandenbroucke JP. The Strengthening the Reporting of Observational Studies in Epidemiology (STROBE) Statement: guidelines for reporting observational studies.

|                           |                    |                                                                                    | Page   |
|---------------------------|--------------------|------------------------------------------------------------------------------------|--------|
|                           |                    | Reporting Item                                                                     | Number |
| <b>Title and abstract</b> |                    |                                                                                    |        |
| Title                     | <a href="#">#i</a> | Indicate the study's design with a commonly used term in the title or the abstract |        |
| Abstract                  | <a href="#">#i</a> | Provide in the abstract an informative and balanced summary of                     |        |

what was done and what was found

## Introduction

Background /  
rationale

[#1](#)

Explain the scientific background and rationale for the investigation being reported

Objectives

[#2](#)

State specific objectives, including any prespecified hypotheses

## Methods

Study design

[#2](#)

Present key elements of study design early in the paper

Setting

[#2](#)

Describe the setting, locations, and relevant dates, including periods of recruitment, exposure, follow-up, and data collection

Eligibility criteria

[#3](#)

Give the eligibility criteria, and the sources and methods of selection of participants.

[#3](#)

Clearly define all outcomes, exposures, predictors, potential confounders, and effect modifiers. Give diagnostic criteria, if applicable

Data sources /  
measurement

[#3](#)

For each variable of interest give sources of data and details of methods of assessment (measurement). Describe comparability of assessment methods if there is more than one group. Give information separately for for exposed and unexposed groups if applicable.

Bias

[#n/a](#)

Describe any efforts to address potential sources of bias

Study size

[#3](#)

Explain how the study size was arrived at

|    |                |                      |                                                                   |
|----|----------------|----------------------|-------------------------------------------------------------------|
| 1  | Quantitative   | <a href="#">#4</a>   | Explain how quantitative variables were handled in the            |
| 2  |                |                      |                                                                   |
| 3  | variables      |                      | analyses. If applicable, describe which groupings were chosen,    |
| 4  |                |                      |                                                                   |
| 5  |                |                      | and why                                                           |
| 6  |                |                      |                                                                   |
| 7  |                |                      |                                                                   |
| 8  |                |                      |                                                                   |
| 9  | Statistical    | <a href="#">#4</a>   | Describe all statistical methods, including those used to control |
| 10 |                |                      |                                                                   |
| 11 | methods        |                      | for confounding                                                   |
| 12 |                |                      |                                                                   |
| 13 |                |                      |                                                                   |
| 14 | Statistical    | <a href="#">#n/a</a> | Describe any methods used to examine subgroups and                |
| 15 |                |                      |                                                                   |
| 16 | methods        |                      | interactions                                                      |
| 17 |                |                      |                                                                   |
| 18 |                |                      |                                                                   |
| 19 | Statistical    | <a href="#">#3</a>   | Explain how missing data were addressed                           |
| 20 |                |                      |                                                                   |
| 21 | methods        |                      |                                                                   |
| 22 |                |                      |                                                                   |
| 23 |                |                      |                                                                   |
| 24 |                |                      |                                                                   |
| 25 | Statistical    | <a href="#">#4</a>   | If applicable, describe analytical methods taking account of      |
| 26 |                |                      |                                                                   |
| 27 | methods        |                      | sampling strategy                                                 |
| 28 |                |                      |                                                                   |
| 29 |                |                      |                                                                   |
| 30 | Statistical    | <a href="#">#n/a</a> | Describe any sensitivity analyses                                 |
| 31 |                |                      |                                                                   |
| 32 | methods        |                      |                                                                   |
| 33 |                |                      |                                                                   |
| 34 |                |                      |                                                                   |
| 35 |                |                      |                                                                   |
| 36 | <b>Results</b> |                      |                                                                   |
| 37 |                |                      |                                                                   |
| 38 |                |                      |                                                                   |
| 39 | Participants   | <a href="#">#4</a>   | Report numbers of individuals at each stage of study—eg           |
| 40 |                |                      |                                                                   |
| 41 |                |                      | numbers potentially eligible, examined for eligibility, confirmed |
| 42 |                |                      |                                                                   |
| 43 |                |                      | eligible, included in the study, completing follow-up, and        |
| 44 |                |                      |                                                                   |
| 45 |                |                      | analysed. Give information separately for for exposed and         |
| 46 |                |                      |                                                                   |
| 47 |                |                      | unexposed groups if applicable.                                   |
| 48 |                |                      |                                                                   |
| 49 |                |                      |                                                                   |
| 50 |                |                      |                                                                   |
| 51 |                |                      | Note it was cross-sectional study                                 |
| 52 |                |                      |                                                                   |
| 53 |                |                      |                                                                   |
| 54 | Participants   | <a href="#">#n/a</a> | Give reasons for non-participation at each stage                  |
| 55 |                |                      |                                                                   |
| 56 |                |                      |                                                                   |
| 57 |                |                      | Note: all participants participated                               |
| 58 |                |                      |                                                                   |
| 59 |                |                      |                                                                   |
| 60 |                |                      |                                                                   |

|    |                  |                      |                                                                   |
|----|------------------|----------------------|-------------------------------------------------------------------|
| 1  | Participants     | <a href="#">#n/a</a> | Consider use of a flow diagram                                    |
| 2  |                  |                      |                                                                   |
| 3  |                  |                      |                                                                   |
| 4  |                  |                      |                                                                   |
| 5  |                  |                      |                                                                   |
| 6  |                  |                      |                                                                   |
| 7  | Descriptive data | <a href="#">#4</a>   | Give characteristics of study participants (eg demographic,       |
| 8  |                  |                      | clinical, social) and information on exposures and potential      |
| 9  |                  |                      | confounders. Give information separately for exposed and          |
| 10 |                  |                      | unexposed groups if applicable.                                   |
| 11 |                  |                      |                                                                   |
| 12 |                  |                      |                                                                   |
| 13 |                  |                      |                                                                   |
| 14 |                  |                      |                                                                   |
| 15 |                  |                      |                                                                   |
| 16 |                  |                      |                                                                   |
| 17 | Descriptive data | <a href="#">#n/a</a> | Indicate number of participants with missing data for each        |
| 18 |                  |                      | variable of interest                                              |
| 19 |                  |                      |                                                                   |
| 20 |                  |                      |                                                                   |
| 21 |                  |                      |                                                                   |
| 22 |                  |                      |                                                                   |
| 23 |                  |                      |                                                                   |
| 24 |                  |                      |                                                                   |
| 25 |                  |                      |                                                                   |
| 26 | Outcome data     | <a href="#">#6</a>   | Report numbers of outcome events or summary measures.             |
| 27 |                  |                      | Give information separately for exposed and unexposed groups      |
| 28 |                  |                      | if applicable.                                                    |
| 29 |                  |                      |                                                                   |
| 30 |                  |                      |                                                                   |
| 31 |                  |                      |                                                                   |
| 32 |                  |                      |                                                                   |
| 33 |                  |                      |                                                                   |
| 34 |                  |                      |                                                                   |
| 35 |                  |                      |                                                                   |
| 36 | Main results     | <a href="#">#n/a</a> | Give unadjusted estimates and, if applicable, confounder-         |
| 37 |                  |                      | adjusted estimates and their precision (eg, 95% confidence        |
| 38 |                  |                      | interval). Make clear which confounders were adjusted for and     |
| 39 |                  |                      | why they were included                                            |
| 40 |                  |                      |                                                                   |
| 41 |                  |                      |                                                                   |
| 42 |                  |                      |                                                                   |
| 43 |                  |                      |                                                                   |
| 44 |                  |                      |                                                                   |
| 45 |                  |                      |                                                                   |
| 46 | Main results     | <a href="#">#n/a</a> | Report category boundaries when continuous variables were         |
| 47 |                  |                      | categorized                                                       |
| 48 |                  |                      |                                                                   |
| 49 |                  |                      |                                                                   |
| 50 |                  |                      |                                                                   |
| 51 |                  |                      |                                                                   |
| 52 | Main results     | <a href="#">#n/a</a> | If relevant, consider translating estimates of relative risk into |
| 53 |                  |                      | absolute risk for a meaningful time period                        |
| 54 |                  |                      |                                                                   |
| 55 |                  |                      |                                                                   |
| 56 |                  |                      |                                                                   |
| 57 | Other analyses   | <a href="#">#9</a>   | Report other analyses done—e.g., analyses of subgroups and        |
| 58 |                  |                      |                                                                   |
| 59 |                  |                      |                                                                   |
| 60 |                  |                      |                                                                   |

1 interactions, and sensitivity analyses

2  
3  
4 **Discussion**

5  
6  
7 Key results [#10](#) Summarise key results with reference to study objectives

8  
9  
10 Limitations [#11](#) Discuss limitations of the study, taking into account sources of  
11 potential bias or imprecision. Discuss both direction and  
12 magnitude of any potential bias.  
13

14  
15  
16  
17 Interpretation [#12](#) Give a cautious overall interpretation considering objectives,  
18 limitations, multiplicity of analyses, results from similar studies,  
19 and other relevant evidence.  
20  
21  
22

23  
24  
25 Generalisability [#12](#) Discuss the generalisability (external validity) of the study  
26 results  
27  
28

29  
30 **Other Information**

31  
32  
33 Funding [#13](#) Give the source of funding and the role of the funders for the  
34 present study and, if applicable, for the original study on which  
35 the present article is based  
36  
37  
38  
39  
40

41 None The STROBE checklist is distributed under the terms of the Creative Commons Attribution  
42 License CC-BY. This checklist can be completed online using <https://www.goodreports.org/>, a tool  
43 made by the [EQUATOR Network](#) in collaboration with [Penelope.ai](#)  
44  
45  
46  
47  
48  
49  
50  
51  
52  
53  
54  
55  
56  
57  
58  
59  
60

# BMJ Open

## Delays in Emergency Obstetrics referrals in Addis Ababa hospitals: a facility-based, cross-sectional study

|                                 |                                                                                                                                                                                                            |
|---------------------------------|------------------------------------------------------------------------------------------------------------------------------------------------------------------------------------------------------------|
| Journal:                        | <i>BMJ Open</i>                                                                                                                                                                                            |
| Manuscript ID                   | bmjopen-2019-033771.R2                                                                                                                                                                                     |
| Article Type:                   | Original research                                                                                                                                                                                          |
| Date Submitted by the Author:   | 10-Mar-2020                                                                                                                                                                                                |
| Complete List of Authors:       | Assefa, Endalkachew; Addis Ababa University College of Health Sciences, obstetrics and gynecology<br>Berhane, Yemane ; Addis Continental Institute of Public Health,                                       |
| <b>Primary Subject Heading</b>: | Obstetrics and gynaecology                                                                                                                                                                                 |
| Secondary Subject Heading:      | Obstetrics and gynaecology, Evidence based practice, Health services research                                                                                                                              |
| Keywords:                       | Human resource management < HEALTH SERVICES ADMINISTRATION & MANAGEMENT, Health policy < HEALTH SERVICES ADMINISTRATION & MANAGEMENT, Quality in health care < HEALTH SERVICES ADMINISTRATION & MANAGEMENT |
|                                 |                                                                                                                                                                                                            |

SCHOLARONE™  
Manuscripts



I, the Submitting Author has the right to grant and does grant on behalf of all authors of the Work (as defined in the below author licence), an exclusive licence and/or a non-exclusive licence for contributions from authors who are: i) UK Crown employees; ii) where BMJ has agreed a CC-BY licence shall apply, and/or iii) in accordance with the terms applicable for US Federal Government officers or employees acting as part of their official duties; on a worldwide, perpetual, irrevocable, royalty-free basis to BMJ Publishing Group Ltd ("BMJ") its licensees and where the relevant Journal is co-owned by BMJ to the co-owners of the Journal, to publish the Work in this journal and any other BMJ products and to exploit all rights, as set out in our [licence](#).

The Submitting Author accepts and understands that any supply made under these terms is made by BMJ to the Submitting Author unless you are acting as an employee on behalf of your employer or a postgraduate student of an affiliated institution which is paying any applicable article publishing charge ("APC") for Open Access articles. Where the Submitting Author wishes to make the Work available on an Open Access basis (and intends to pay the relevant APC), the terms of reuse of such Open Access shall be governed by a Creative Commons licence – details of these licences and which [Creative Commons](#) licence will apply to this Work are set out in our licence referred to above.

Other than as permitted in any relevant BMJ Author's Self Archiving Policies, I confirm this Work has not been accepted for publication elsewhere, is not being considered for publication elsewhere and does not duplicate material already published. I confirm all authors consent to publication of this Work and authorise the granting of this licence.



1  
2  
3 Delays in Emergency Obstetrics referrals in Addis Ababa hospitals: a facility-based, cross-sectional study  
4

5 Endalkachew Mekonnen Assefa<sup>1</sup>, Yemane Berhane<sup>2</sup>  
6

7 <sup>1</sup> Addis Ababa University-College of Health Sciences (AAU-CHS); [endmekon@gmail.com](mailto:endmekon@gmail.com): corresponding  
8 author <sup>2</sup> Addis Continental Institute of Public Health (ACIPH); [yemaneberhane@gmail.com](mailto:yemaneberhane@gmail.com)  
9

10 Abstract  
11

12 **Objectives:** To assess where the delays occur in the referral chain at most and maternal health  
13 outcomes based on the three delay model in Addis Ababa.  
14

15 **Design:** The study was a facility-based cross-sectional study  
16

17 **Setting:** Two public and tertiary hospitals in Addis Ababa  
18

19 **Participants:** All pregnant women who were referred for only labor and delivery services after 28 weeks  
20 of gestation between December 2018 and February 2019 in Zewditu and Gandhi Memorial hospitals.  
21

22 **Primary and secondary outcome measures:** The primary outcome was the type of delays from the  
23 three-delay model which met operationally defined time. Maternal health outcomes based on the  
24 three-delay model as a secondary outcome.  
25

26 **Results:** A total of 403 pregnant women referred for delivery to the study hospitals were included in  
27 the study. Three-fourth (301, 74.7%) of referred pregnant women had the third delay (delayed receiving  
28 appropriate care); (211, 52.4%) had a first delay (delay in making a decision to seek care). Overall  
29 366(90.8%) pregnant women had experienced at least one of the three delays and 71(17.6%) had all the  
30 three delays. Twenty-nine (7.2%) referred women had severe maternal outcomes (SMO). The most  
31 leading causes/diagnosis of SMO were blood transfusion 17 (58.6%) followed by postpartum  
32 hemorrhage 15 (52%) then eclampsia 9 (31%). In addition, women who experienced severe maternal  
33 outcomes were 2.9 times more likely to have at least one of the three delays.  
34

35 **Conclusion & recommendation:** This study highlights the persistence of delays at all levels and  
36 especially delay three and its contribution to severe maternal outcomes. Strengthening health referral  
37 systems and addressing specific health system bottlenecks during labor and birth in order to ensure no  
38 mother will be endangered. We also recommend a qualitative method of study (focus group discussion  
39 and in-depth interview) and observing the tertiary hospitals set-up and readiness to manage obstetrics  
40 emergencies.  
41

42 **Key words:** Addis Ababa, Emergency obstetrics referral, severe maternal outcomes, Three-delay model  
43  
44  
45  
46  
47  
48  
49  
50  
51  
52

1  
2  
3  
4  
5 Article summary  
6

7 Strengths and limitations  
8

9 This study gives the extent of delays and severe maternal outcomes experienced by women who  
10 were referred for labor and delivery.  
11

12 This study focused on women with severe maternal outcomes (SMO) rather than less severe  
13 forms of obstetric complications because their situations are the closest to maternal deaths.  
14

15 Women after delivery might be missed if they transferred to health centers and to other  
16 hospitals after delivery for different reasons.  
17

18 The results might not be representative of other institutions and the communities because it  
19 was conducted in two referral hospitals that often receive and treat complicated cases.  
20  
21  
22  
23  
24  
25  
26  
27  
28  
29  
30  
31  
32  
33  
34  
35  
36  
37  
38  
39  
40  
41  
42  
43  
44  
45  
46  
47  
48  
49  
50  
51  
52  
53  
54  
55  
56  
57  
58  
59  
60

## Introduction

The majority of maternal deaths are clustered around labour, delivery and the first 24 hours postpartum period (1),(2). It is estimated that just five conditions (postpartum hemorrhage; puerperal sepsis; preeclampsia and eclampsia; obstructed or prolonged labour, and complications of unsafe abortion), account for at least 60% of all maternal mortality (3). Life-threatening situations may develop rapidly and without warning, often in previously uncomplicated pregnancies(4).

Globally, it is recognized that significant inroads in maternal mortality cannot be made without dramatically increasing access to emergency obstetrical care (EmOC). The World Health Organization estimates that at least 88–98% of maternal deaths can be averted with timely access to existing, emergency obstetric interventions (5). This produces a triple return on investment, saving women and newborns and preventing stillbirths(6).

A number of factors can influence a woman's ability to access effective interventions to treat complications in the event of an obstetric emergency. Thaddeus and Maine (1994) group these into three broad categories using a classic, pathways-based framework known as the 'three delays model'(7). The 'three delays model' attempts to explain delays in women accessing emergency obstetric care as the result of 1) decision-making, 2) accessing services and 3) receipt of appropriate care once a health facility is reached.

Referral is often associated with the second delay of the three delays model– associated with reaching the appropriate level of care. But in fact, a referral system can reduce all three delays. If a population knows that a system is reliable and affordable, families may make the decision to seek care more quickly (the first delay(8)).

The major obstacles that affect the referral system reported by both the health workers and women were: 1) financial barriers (for transportation and service payments at health facilities), 2) lack of means of transportation, 3) distance and 4) lack of awareness of services and the importance of services (9).

Factors associated with health-seeking behavior are multidimensional. Socio-cultural and economic problems, lack of awareness, the quality of health services, and infrastructure such as transport services all affect whether and where a woman will seek care, how long it will take to reach care, and whether she receives the appropriate care in a timely fashion(10).

Studies showed referrals in pregnancy and childbirth can be (1) institutional or self-referral, depending on the involvement of first line services; (2) antenatal, delivery or postnatal referral; and (3) elective or emergency referral. Pregnant women may be referred due to demographic risks, obstetric historical risks, prenatal complications, and delivery and immediate postnatal complications(11). On the other hand, Studies show that high-risk prediction may not necessarily mean that the woman will have a complication and many women identified as being at risk go on to have normal deliveries(12).

1  
2  
3 Defining a framework and process for obstetric referrals may lead to reduction of maternal mortality  
4 and morbidity. Referral should be broadly defined to include not only transport, but it should be timely  
5 referral to minimize or prevent the delay for transportation (called second delay), and ensure pre-  
6 hospital care while transporting a patient to the referral facility(13), (14).  
7  
8

9 It is widely accepted that substantial reductions in maternal mortality and maternal near- miss are  
10 impossible to achieve without early decision-making to seek care, an effective referral system for  
11 complicated cases and receiving timely and appropriate care (9), (15) . Near miss cases represent most  
12 of the characteristics of maternal deaths, but occur more often (16). The near-miss approach assesses  
13 the gap between the actual use and optimal use of high-priority effective interventions in the  
14 prevention and management of severe maternal complications related to pregnancy and childbirth (17).  
15  
16

17 The objective of this study was to determine the types of delay and maternal health outcomes based on  
18 the three delay model among women who referred for labor and delivery. Results from this study may  
19 be an input for the hospitals, health bureau, policy-makers, and other stakeholders to act on bottle-  
20 necks of emergency obstetrics services by identifying the most common types of delay.  
21  
22

## 23 Methods

24  
25 We used the STROBE cross-sectional reporting guidelines (18).  
26  
27

## 28 Study design

29  
30 A facility-based cross-sectional study was conducted between December 10/2018-February 28/2019 in  
31 two government hospitals Zewditu Memorial Hospital (ZMH) and Gandhi Memorial Hospitals (GMH).  
32  
33

## 34 Study setting

35  
36 This study conducted in tertiary hospitals located in the capital city of Ethiopia, Addis Ababa. Both  
37 hospitals are under Addis Ababa Health Bureau and affiliated with Addis Ababa University-College of  
38 Health Sciences. Gandhi Memorial Hospital is a referral maternity hospital and Zewditu Memorial  
39 Hospital is also a comprehensive referral hospital. Both hospitals are catchment hospitals for 40 (forty)  
40 health centers and other health facilities. Both hospitals are giving Comprehensive emergency obstetric  
41 care (CEmOC) and attending more than 17,000 deliveries per year.  
42  
43

44 The referral system for an obstetric emergency in Addis Ababa is organized to include Basic Emergency  
45 obstetric care (BEmOC) and CEmOC facilities. The referral system is developed to work both ways.  
46 Referral between health facilities is facilitated by the liaison office or Maternal Health Task Force. An  
47 ambulance system is organized to transport women accompanied by midwives. The midwife provides  
48 care during transportation and hand-over the mother to the receiving hospital care provider with a  
49 referral paper. In Addis Ababa, all maternity services including labour/delivery and the ambulance  
50 services are provided free of charge in all government health facilities. All components of BEmOC are  
51 expected to be given in the health centres.  
52  
53  
54  
55  
56  
57

### Eligibility criteria

All pregnant women who were referred for only labor and delivery services after 28 weeks of gestation or baby outcome  $\geq 1$  kg and delivered in the selected hospitals, and also who gave consent were included.

### Data Collection Tools

After they gave birth, women were identified and interviewed from emergency OPD, labor ward, and in-patient wards every day before they discharged from the hospital by data collectors using pretested and structured questionnaires.

### Data Collection Procedures

The referral papers reviewed and date, time and diagnosis of referral was recorded for each mother. The triage paper and patient chart are also reviewed including mode of transportation, date and time of arrival, sources of referrals, obstetrics performances, the time taken to admit/get the service after arrival, diagnosis at receiving hospital, gestational age, place and mode of delivery, newborn outcomes, and severe maternal complications types and managements. Women interviewed on socio-demographic characteristics, time interval to seek medical advice and reason for the delay to seek the care (if there was).

The completed questionnaires were reviewed by the principal investigator and supervisors. Incomplete questionnaires were filled if the women were not discharged; otherwise incomplete questionnaires were discarded.

### Main outcomes and measures of the study

The three delays time frame was operationally defined through a consultative process involving six obstetrician & gynecologists (three from each hospital) who had working experience of 7-20 years in the selected hospitals. Accordingly, the first delay defined time elapsed between the recognition of complication/s, and the decision to transport and reach to a health facility, was considered if it took more than 60 minutes. The second delay was defined if the mother did not reach to referral hospitals within 60 minutes of referral. The third delay was if the mother didn't receive care or admitted within 30 minutes. Severe maternal outcomes (SMO) were any maternal complications including blood transfusion (any type &  $\geq 2$  units), Post-partum hemorrhage, shock, eclampsia, uterine rupture, pulmonary edema, laparotomy, laboratory evidence of organ damage and/or maternal death during the process of delivery and/or before discharge from the hospital. Potentially life-threatening maternal conditions (PLTMC) was considered when the mother had at least one of the following; hemorrhagic complications, hypertensive disorders, and complications, end-organ injury, blood product transfusion, ICU admission, uterine rupture, hysterectomy/laparotomy.

**Sample size:** Single proportion formula used by assuming 50% of the referred women have a delay, degree of precision of a 5% (d), confidence interval of 95% ( $Z=1.96$ ), assuming 5% non-response rate and the final the sample size was 403.

### Statistical analysis

Data were entered in epi-info version 7.2.2.6 and transported to SPSS Version-21 statistics software for cleaning and analysis. Descriptive statistics were used to present women by their socio-demographic characteristics, referral diagnosis, diagnosis at receiving hospitals, obstetrics characteristics, mode of delivery, newborn outcomes, the three delays, and severe maternal outcomes. Severe maternal outcomes were analyzed for the three delays. The relationship between the three delays and SMO were examined using the multivariate logistic regression. The goodness of the model was tested by Hosmer-Lemeshow test for goodness-of-fit. Selected variables were included in the model to account for maternal characteristics differences other than delays in seeking and receiving care.

### Ethical issues

Ethical clearance was obtained from both Addis Continental Institute of Public Health (ACIPH) and Addis Ababa Health Bureau (AAHB) Institution Review Board (IRB). Support letters were written to both study hospitals from AAHB-IRB to gain access.

### Patient and public involvement:

Women asked for some questions after obtained informed consent on a voluntary basis. All the responses were given by the participants and the results obtained kept anonymous and confidential. There was no public involvement in the design, conduct, and interpretation of the study. Patients were not asked to advise on interpretation or writing up of results. We did not include patient involvement in the design of this study. We have presented a summary of the findings at medical and public health schools and among health providers in Addis Ababa and plan to continue presenting the results at professional society's conferences. Results were shared with the administration of both selected hospitals and Addis Ababa health Bureau to facilitate improved obstetrics services. There are no plans to disseminate the results of this research to study participants.

### Results

Table 1 shows the descriptive information for socio-demographic and obstetric characteristics of referred pregnant women. The mean age of 403 pregnant women referred for labor delivery services was  $26.47 \pm 4.5$  years and ranged from 18 to 43. The majorities were married (380,94.3%), and have completed at least secondary school (54.3%). Majority women were primigravida (56.1%), the mean gravidity was  $1.77 \pm 1.1$  and ranged between 1 to 7. Most pregnant women (58.8%) were at term pregnancy (37 weeks- 41w6d) (Table1).

Table 1. Socio-demographic and obstetrics characteristics of respondents, Addis Ababa, Ethiopia, 2019 (n=403)

| Characteristics n=403 | Number (%) |
|-----------------------|------------|
|-----------------------|------------|

|                                            |            |
|--------------------------------------------|------------|
| Study Hospital                             |            |
| Gandhi Memorial Hospital (GMH)             | 173 (42.9) |
| Zewditu Memorial Hospital (ZMH)            | 230 (57.1) |
| Age (years) median: 26 years (range 18-43) |            |
| < 20                                       | 32 (7.9)   |
| 20-25                                      | 158 (39.2) |
| 26-30                                      | 151 (37.5) |
| 31-35                                      | 46 (11.4)  |
| ≥36                                        | 16 (4.0)   |
| Marital status                             |            |
| Married                                    | 380 (94.3) |
| Others(unmarried, divorced)                | 23 (5.7)   |
| Educational level                          |            |
| No formal education                        | 49 (12.2)  |
| Primary school                             | 135 (33.5) |
| Secondary school                           | 117 (29.0) |
| Preparatory                                | 35 (8.7)   |
| Vocational and above                       | 67 (16.6)  |
| Gravidity n=403                            |            |
| 1                                          | 226 (56.1) |
| 2-4                                        | 165 (40.9) |
| ≥5                                         | 12 (3.0)   |
| Parity n=146                               |            |
| 1                                          | 90 (61.6)  |
| ≥2                                         | 56 (38.4)  |

| Abortion n=60   |            |
|-----------------|------------|
| 1               | 48 (80 )   |
| ≥ 2             | 12 (20)    |
| Gestational age |            |
| 28-33w6d        | 9(2.2)     |
| 34-36w6d        | 22 (5.5)   |
| 37-41w6d        | 237 (58.8) |
| ≥ 42            | 42 (10.4)  |
| Unknown         | 93 (23.1)  |

The majority of the pregnant women were referred from health centers (387, 96%) and transported by the ambulance (72%) (Table 2).

The majority of the women delivered through vaginal route (254, 63.3%) followed by Cesarean-section (148, 36.7%). The most common indication for C-section was non-reassuring fetal heart rate pattern (27 %) followed by cephalo-pelvic disproportion/malpresentation/malposition (24.3%) then meconium staining in the latent first stage of labor (22.3%). The majority of the babies were born alive (389, 96.5%). There were eight (2%) intrapartum fetal losses (Table 2).

Table 2. Source of referral, transportation, mode & place of delivery and perinatal outcome, among referred pregnant women for delivery, Addis Ababa, Ethiopia, 2019.

| Characteristics             | Number (%) |
|-----------------------------|------------|
| Source of referral N=403    |            |
| Health Center               | 387 (96.0) |
| Others                      | 16 (4.0)   |
| Transportation              |            |
| Ambulance                   | 290 (72)   |
| Others( Taxi, personal car) | 113 (28)   |



|                                                        |            |
|--------------------------------------------------------|------------|
| Receiving hospital contacted before the women referred |            |
| Yes                                                    | 157 (39.0) |
| No                                                     | 246 (61.0) |
| Mode of delivery                                       |            |
| Vaginal delivery                                       | 229 (56.8) |
| Assisted breech delivery                               | 4 (1.0)    |
| C-section                                              | 148 (36.7) |
| Instrumental delivery                                  | 21(5.2)    |
| Vacuum                                                 | 16 (4.0)   |
| Forceps                                                | 5 (1.2)    |
| Laparotomy                                             | 1 (0.2)    |
| C-section indication N=148                             |            |
| Non-reassuring fetal heart rate (NRFHR)                | 40 (27.0)  |
| Meconium in LFSOL                                      | 33 (22.3)  |
| Cephalopelvic disproportion (CPD)                      | 21 (14.2)  |
| Malpresentation/malposition                            | 15 (10.1)  |
| Previous C-scar with labor/labor abnormality           | 10 (6.8)   |
| Cord prolapse/presentation                             | 7 (4.7)    |
| Non reassuring biophysical profile (NRBPP)             | 5 (3.4)    |
| APH                                                    | 4 (2.7)    |
| Others                                                 | 13(8.8)    |
| Place of delivery                                      | N=403      |
| Labor ward/Operation room                              | 386 (95.8) |
| Emergency OPD                                          | 17 (4.2)   |

| Outcome                              | N=403 |            |
|--------------------------------------|-------|------------|
| Alive                                |       | 389 (96.5) |
| Newborn referred to NICU             | Yes   | 137 (34)   |
|                                      | No    | 252 (62.5) |
| Stillbirth                           |       | 14 (3.5)   |
| Fetal heart beat positive on arrival |       | 8(2.0)     |
| Fetal heart beat negative on arrival |       | 6(1.5)     |

Among 403 referred women for childbirth, 71(17.6%) women experienced all the three delays. Almost three-fourth referred women (74.7%) were experienced the third delay followed by first delay (52.4%). The majority (366, 90.8%) women had at least one of the delays (Table 3).

Table 3. The frequency of the three delays among referred women, Addis Ababa, Ethiopia 2019.

| Characteristics    | Number (%) |            |
|--------------------|------------|------------|
|                    | Yes        | No         |
| N=403              |            |            |
| First delay        | 211 (52.4) | 192 (47.6) |
| Second delay       | 163 (40.4) | 240(59.6)  |
| Third delay        | 301(74.7)  | 102(25.3)  |
| At least one delay | 366 (90.8) | 37 (9.2)   |
| All three delay    | 71 (17.6)  | 332 (82.4) |

\*\* multiple answer possible

Twenty-nine (7.2%) women had severe maternal outcomes. The most common severe maternal outcomes were blood transfusion (58.6%) followed by postpartum hemorrhage (51.7%) then eclampsia (31%). Nearly three-fourth women with SMO (78.5%) had more than one complication (Figure1).

The most common delays in women with SMO were the third delay (58.6%) followed by first delay (51.7%). All most three-fourth women experienced at least one of the delays (79.3%) and one-quarter (24.1%) women had all the delays (Table 4).

Statistically, a significant association was observed between SMO and third delay, at least one of the delays. Referred women with the third delay had 2.2 times (95% CI of 1.025-4.840) more likely to be a

1  
2  
3 risk for severe maternal outcomes. Women who experienced at least one of the delays had 2.9 times  
4 (95% CI 1.093-7.620) more likely to be a risk for severe maternal outcomes (Table 4).  
5

6  
7 After adjusted for age, gravidity, parity, educational level, and marital status none of the delays were  
8 significant. This may be due to a small sample of women with SMO. Also, the three delays were not  
9 significant for age, gravidity, parity, educational level, gestational age, and marital status.  
10  
11

12  
13 Table 4. SMO and types of delays Addis Ababa, Ethiopia 2019.  
14

| Characteristics    | Severe maternal outcomes |             |            |         |                    |
|--------------------|--------------------------|-------------|------------|---------|--------------------|
|                    | Types of delay           | No          | Yes        | P-value | COR 95 % CI        |
|                    |                          | Number (%)  | Number (%) |         |                    |
| First delay        | No                       | 178 (47.6%) | 14 (48.3)  | 0.944   | 1.028(0.483-2.189) |
|                    | Yes                      | 196 (52.4)  | 15 (51.7)  |         |                    |
| Second delay       | No                       | 224 (59.9)  | 16 (55.2)  | 0.618   | 1.213(0.567-2.596) |
|                    | Yes                      | 150 (40.1)  | 13 (44.8)  |         |                    |
| Third delay        | No                       | 90(24.1)    | 12 (41.4)  | 0.043   | 2.227(1.025-4.840) |
|                    | Yes                      | 284 (75.9)  | 15 (58.6)  |         |                    |
| All delays         | No                       | 310 (82.9)  | 22 (75.9)  | 0.342   | 1.541(0.632-3.761) |
|                    | Yes                      | 64 (17.1)   | 7 (24.1)   |         |                    |
| At least one delay | No                       | 31 (8.3)    | 6 (20.7)   | 0.032   | 2.889(1.093-7.620) |
|                    | Yes                      | 343 (91.7)  | 23(79.3)   |         |                    |

15  
16  
17  
18  
19  
20  
21  
22  
23  
24  
25  
26  
27  
28  
29  
30  
31  
32  
33  
34  
35  
36  
37  
38  
39  
40  
41  
42  
43  
44  
45  
46  
47  
48  
49  
50  
51  
52  
53  
54  
55  
56  
57  
58  
59  
60  
9

\*\*AOR not significant after adjusted for age, marital status, educational level, gestational age, gravidity, parity.

Eighty (19.9%) of referred women had at least one potential life- threatening conditions (PLTC). The most common complications were hypertensive disorders 56 (70%) followed by blood transfusion 17 (21.3%) then postpartum hemorrhage (Table 5).

Table 5.Potentially life threatening conditions among referred women Addis Ababa, Ethiopia,2019

| Characteristics* N=80 | Number (%) |
|-----------------------|------------|
|                       |            |

|                                           |           |
|-------------------------------------------|-----------|
| Hemorrhagic complications                 |           |
| Ante partum hemorrhage (AP,PP)            | 13 (16.3) |
| Post partum hemorrhage (PPH)              | 15 (18.8) |
| Ruptured uterus                           | 1 (1.25)  |
| Coagulopathy                              | 2 (2.5)   |
| Hypertensive disorders                    |           |
| Severe hypertension/Preeclampsia          | 50 (62.5) |
| Eclampsia                                 | 9 (11.3)  |
| HELLP syndrome                            | 2 (2.5)   |
| Others                                    |           |
| Pulmonary edema                           | 1 (1.25)  |
| Shock                                     | 1(1.25)   |
| Thrombocytopenia                          | 2 (2.5)   |
| Management indication of severity         |           |
| Transfusion of blood derivatives          | 17 (21.3) |
| Major surgical intervention(hysterectomy) | 1(1.25)   |
| *Multiple response possible               |           |

## Discussion

All three types of delay were common in the study hospitals; the most severe being the delay within the receiving hospital. The third delay was significantly associated with severe maternal outcomes.

Studies have found that distance to facilities is a clear barrier to women accessing health facilities (19) (20) but in Addis Ababa, proximity to services does not appear to be a problem, as the median distance to a facility that provides surgical services is 5 kilometers, well below the national average of 45 kilometers (21). Two-fifth of women had the second delay. When we compare with other studies it may be low however this proportion of the second delay is not expected because referring facilities/catchment health centers are near to the receiving hospitals and expected to refer by ambulance (22).

1  
2  
3 This study showed the rate of occurrence of SMO indicators were higher than the findings of an earlier  
4 study done in other parts of the country (22) (23) (24) (25) and other countries (26-28). This high  
5 proportion SMO might be due to the fact that our study selected facilities are referral hospitals which  
6 are serving complicated cases and cases referred from other health facilities which were beyond their  
7 capacity/needed further interventions. This study showed that direct obstetric causes were the most  
8 common leading factors of SMO and the most common diagnosis were postpartum hemorrhage (52%)  
9 followed by eclampsia (31%) and the most common intervention was blood transfusion (58.6%).  
10 Obstetric hemorrhage and hypertensive disorders (eclampsia, hematological coagulation, and  
11 pulmonary edema) were found to be the top underlying complications among cases of SMO; similarly,  
12 hypertensive disorders and obstetric hemorrhage were the most common underlying causes of PLTC.  
13 This is comparable to the findings from studies in other parts of the country (23), (24) (25) and other  
14 countries (27-31) including sub-Saharan countries (32) (33).  
15  
16  
17  
18

19  
20 Emergency obstetric care use by pregnant women is influenced by a complex interaction of factors  
21 leading to delay in decision-making, accessing services and receipt of proper care once a health facility is  
22 reached(32) (33). Receiving appropriate care after reaching the health facility (delay three) was the most  
23 common (58.6%) followed by a delay in seeking care (delay one) (51.7%) then reaching at the  
24 appropriate health facility (delay two) (44.8%) were identified among SMO and more than half of  
25 (58.6%) SMO cases had encountered at least one of the delays which were similar to study done  
26 elsewhere in the country (23) (34) (35); however, delay two and one is seen less frequently than the  
27 findings from other countries (27) (32) (33) (36-39). This can be justified by overloaded of cases, limited  
28 hospitals capacity, the difference in socio-demographic characteristics of the study population and the  
29 proximity of health facilities.  
30  
31  
32

33  
34 In this study, failure to receiving appropriate care after reaching the health facility (delay three) was  
35 found to have the strongest association with SMO: with a two-fold increase in the risk. This supports the  
36 WHO hypothesis relating a high case fatality in the hospital as an indicator for the presence of delay in  
37 receiving adequate and proper treatment (19) and it indicates the poor performance of obstetrics  
38 services (40) (41). Seeking care from a facility that is incapacitated health facility and system, poor  
39 leadership (mismanagements of hospital resources, poor co-ordinations and lack of understanding of  
40 obstetrics emergencies) contribute to significant delay after reaching the health facility. These factors  
41 were reported as significant contributors to delay in several studies (23) (34) (36) (37). Studies from  
42 Tigray, 88% of all maternal deaths were attributed to health system failure (35). In our study, 59 % of  
43 SMO cases and both maternal deaths (MD) had a health system related factors as a possible reason for  
44 delay three.  
45  
46  
47

48  
49 The limitation of this study include that it was conducted in two referral hospitals which often receive  
50 complicated cases and referred women with complications; and the results might not be representative  
51 of other institutions and the community. In addition, cases might be missed because if they transferred  
52 to health centers and other hospitals after delivery for different reasons.  
53

54  
55 However, we believe that this study gives the extent of delays and SMO &its indicators experienced by  
56 women who were referred for an emergency delivery. In fact, if the delay is so severe in these well-  
57

1  
2  
3 established referral centers one may expect it to be worse in some not well-staffed and equipped  
4 centers. We decided to focus on women with severe maternal outcomes (SMO) rather than less severe  
5 forms of obstetric complications because their situations are the closest to maternal deaths.  
6  
7

## 8 Conclusion

9  
10 The burden of severe maternal outcomes (SMO) is high due to preventable and/or treatable direct  
11 obstetric. The majority of the women in this study had serious delays in both making decisions to seek  
12 care for birthing and in actually receiving care once at a hospital. We recommend strengthening health  
13 referral systems and addressing specific health systems bottlenecks during labor and delivery in order to  
14 ensure no woman will be endangered. We also recommend a qualitative method of study  
15 (including focus group discussion, in-depth interview) and observing the tertiary hospitals set-  
16 up and readiness to manage high-risk pregnancies.  
17  
18  
19

## 20 Abbreviations

21  
22 AAHB-IRB: Addis Ababa Health Bureau-Institutional Review Board

23  
24 BEmOC: Basic Emergency Obstetrics Care

25  
26 CEmOC: Comprehensive Emergency Obstetrics Care

27  
28 GMH: Gandhi Memorial Hospital

29  
30 HELLP: Hemolysis, Elevated liver enzyme, Low Platelets

31  
32 ICU: Intensive Care Unit

33  
34 LW: Labor Ward

35  
36 MD: Maternal Death Ratio

37  
38 MNM: Maternal Near-Miss

39  
40 MWH: Maternity Waiting Home

41  
42 OPD: Out-Patient Department

43  
44 PIH: Pregnancy Induced Hypertension

45  
46 PLTC: Potential Life Threatening Conditions

47  
48 PPH: Post Partum Hemorrhage

49  
50 SMO: Severe Maternal Outcomes

51  
52 WHO: World Health Organization

1  
2  
3 ZMH: Zewditu Memorial Hospital  
4

5 Acknowledgments  
6

7 We would like to thank residents and Interns of Addis Ababa University-College of Health sciences:  
8 without their support on data collection this research may not be reached to this stage.  
9

10 Author Details  
11

12  
13 <sup>1</sup>Endalkachew Mekonnen Assefa (MD, MPH), Addis Ababa University-College of Health Sciences  
14 Department of Obstetrics and Gynecology; e-mail-[endmekon@gmail.com](mailto:endmekon@gmail.com); phone no. +251-913605674:  
15 corresponding author  
16

17  
18 <sup>2</sup>Yemane Berhane (MD, Ph.D.), Addis Continental Institute of Public Health; [yemaneberhane@gmail.com](mailto:yemaneberhane@gmail.com)  
19

20 Contributors: EMA did design of the work, drafting the work, analysis, interpretation of data for the  
21 work and write-up the manuscript. YB advised the paper's scope, the draft of the manuscript and did  
22 revise it critically for important intellectual content. Both authors approved the final version.  
23

24 Conflict of interest: None declared  
25

26 Source of funding: 'This research received no specific grant from any funding agency in the public,  
27 commercial or not-for-profit sectors'.  
28

29  
30 Ethics approval: Ethical approval was received from both Addis Continental Institute of Public Health  
31 and Addis Ababa Health Bureau ethical review board.  
32

33 Data availability statement: data are available from the corresponding author upon reasonable request.  
34  
35  
36  
37  
38  
39  
40  
41  
42  
43  
44  
45  
46  
47  
48  
49  
50  
51  
52  
53  
54  
55  
56  
57

## References

1. Campbell O, Graham WJ. Measuring maternal mortality and morbidity: levels and trends. London: Lond Sch Hyg Trop Med. 1990;
2. Li XF, Fortney JA, Kotelchuck M, Glover LH. The postpartum period: the key to maternal mortality. *Int J Gynaecol Obstet.*1996;54:1–10.
3. Khan KS, Wojdyla D, Say L, Gulmezoglu AM, Van Look PF. WHO analysis of causes of maternal death: a systematic review.2006; *Lancet* 367:1066– 1074.
4. Fortney J. Emergency obstetric care: the keystone in the arch of safe motherhood. .; *IJOG.* 2001;(74):95–97.
5. World Health Organization (WHO). Maternal Mortality. Fact Sheet. Media Centre. 2016;
6. World Health Organization (WHO). True magnitude of stillbirths and maternal and neonatal deaths underreported. Media Cent. 2016;
7. Thaddeus S, Maine D. Too far too walk: maternal mortality in context. *Soc Sci Med.* 1994;38:1091–110.
8. The Effectiveness of Emergency Obstetric Referral Interventions in Developing Country Settings: A Systematic Review [Internet]. [cited 2018 Jul 28]. Available from: <http://journals.plos.org/plosmedicine/article?id=10.1371/journal.pmed.1001264>
9. Knight HE, Self A, Kennedy SH. Why Are Women Dying When They Reach Hospital on Time? A Systematic Review of the ‘Third Delay.’ *PLoS ONE* [Internet]. 2013 May 21 [cited 2018 Sep 7];8(5). Available from: <https://www.ncbi.nlm.nih.gov/pmc/articles/PMC3660500/>
10. JSI Research and Training Institute. The Last 10 Kilometers (L10K). Emergency referral for pregnant women and newborns: A Rapid Community and Health System Assessment. BETA Development Consulting Firm, Addis Ababa. 2012 Jun;
11. U. Onwudiegwu, O. C.Ezechi. Emergency obstetric admissions: late referrals, misdiagnoses and consequences. *J J Obstet Gynaecol.* 2001; Volume 21 (Issue 6).
12. Bossyns P, Abache R, Abdoulaye MS, Miyé H, Depoorter A-M, Van Lerberghe W. Monitoring the referral system through benchmarking in rural Niger: an evaluation of the functional relation between health centres and the district hospital. *BMC Health Serv Res.* 2006 Apr 12;6(1):51.
13. Giovine A, Ostrowski C. Technical report on Improving Transportation and Referral for Maternal Health: Knowledge Gaps and Recommendations. Wilson Cent. 2010;
14. Ronsmans C, Graham WJ, Lancet. Maternal Survival Series steering group: Maternal mortality: who, when, where, and why. *Lancet.* 2006;(368(9542)):1189–2000.



15. Qureshi RN, Sikandar R, Hoodbhoy Z, Bano R, Jabeen N. Referral pattern of emergencies in obstetrics: Implications for defining scope of services and policy. *JPMA J Pak Med Assoc.* 2016;66(12):1606–10.
16. Ellen Nelissen, Estomih Mduma, Jacqueline Broerse, Hege Ersdal, Bjørg Evjen-Olsen, Jos van Roosmalen, Jelle Stekelenburg. Applicability of the WHO Maternal Near Miss Criteria in a Low-Resource Setting. *PLOS ONE* | [www.plosone.org](http://www.plosone.org). April 2013 | Volume 8 | Issue 4 | e6124.
17. World Health Organization. Evaluating the quality of care for severe pregnancy complications: the WHO near-miss approach for maternal health. Geneva: WHO; 2011.
18. Von Elm E, Altman DG, Egger M, Pocock SJ, Gotsche PC, Vandenbroucke JP. The Strengthening the Reporting of Observational Studies in Epidemiology (STROBE) Statement: guidelines for reporting observational studies.
19. McNamee P, Ternent L, Hussein J. Barriers in accessing maternal healthcare: evidence from low-and middle-income countries. *Expert Rev Pharmacoecon Outcomes Res.* 2009;9(1):41–8.
20. Gabrysch SC, Oona MR. Still to far to walk: Literature review of the determinants of delivery service use. *BMC Pregnancy Childbirth.* 2009;9(34).<http://www.biomedcentral.com/1471-2393/9/34>.
21. Federal Ministry of Health, Addis Ababa Regional Health Bureau. Emergency Obstetric and Newborn Care Services: Standard Operation Manual for Activities of Catchment Teams in Addis Ababa. 2012.
22. Dile M, Abate T, Seyum T. Proportion of maternal near misses and associated factors in referral hospitals of Amhara regional state, Northwest Ethiopia: institution-based cross-sectional study. *GynecolObstet (Sunnyvale).* 2015; 5:308. <https://doi.org/10.4172/2161-0932.1000308>.
23. Wondimagegnehu Sisay Woldeyes, Dejene Asefa and Geremew Muleta. Incidence and determinants of severe maternal outcome in Jimma University teaching hospital, south-West Ethiopia: a prospective cross-sectional study. *Woldeyes Al BMC Pregnancy Childbirth* 2018. 18:255(18:255).
24. Gebrehiwot Y, Tewolde BT. Improving maternity care in Ethiopia through facility based review of maternal deaths and near misses. *Int J GynecolObstet.* 2014; 127:S29–34.
25. Liyew EF, Yalew AW, Afework MF, Esse. Incidence and causes of maternal near-miss in selected hospitals of Addis Ababa, Ethiopia. *ONE.* 2017;12(6):e0179013. <https://doi.org/10.1371/journal.pone.0179013>.
26. Jabir M, et al. Maternal near miss and quality of maternal health care in Baghdad, Iraq. *BMC Pregnancy Childbirth.* 2013;13:11.
27. Leonardo Antonio Chavane, Patricia Bailey, Osvaldo Loquiha, Martinho Dgedge, Marc Aerts, and Marleen Temmerman. Maternal death and delays in accessing emergency obstetric care in Mozambique. *BMC Pregnancy and Childbirth.* (2018) 18:71 <https://doi.org/10.1186/s12884-018-1699-z>.

- 1  
2  
3 28.Syeda B.Mazhar, AfshanBatoool, AngelaEmanuel, Arif T.Khan, ShireenBhutta.Severe maternal  
4 outcomes and their predictors among Pakistani women in the WHO Multicountry Survey on Maternal  
5 and Newborn Health. International Journal of Gynecology & Obstetrics Volume 129, Issue 1, April 2015,  
6 Pages 30-33.  
7  
8  
9 29. Özge Tunçalp, Michelle J. Hindin, Kwame Adu-Bonsaffoh , Richard M., Adanu. Assessment of  
10 maternal near-miss and quality of care in a hospital- based study in Accra, Ghana. Int J Gynecol Obstet  
11 123 (2013) 58–63.  
12  
13 30. Say L, Souza JP, Pattinson RC. WHO working group on Maternal Mortality and Morbidity  
14 classifications. Maternal near miss–towards a standard tool for monitoring quality of maternal health  
15 care. 2009. 23:287–96.  
16  
17 31. Nelissen EJ, et al. Maternal near miss and mortality in a rural referral hospital in northern Tanzania: a  
18 cross-sectional study. BMC Pregnancy Childbirth. 2013;13:141.  
19  
20 32. Oladapo et al. When getting there is not enough: a nationwide cross-sectional study of 998 maternal  
21 deaths and 1451 near-misses in public tertiary hospitals in a low-income country.  
22 BJOG.2015.www.bjog.org.DOI: 10.1111/1471-0528.13450.  
23  
24 33. Dan K Kaye, Othman Kakaire, and Michael O Osinde. Systematic review of the magnitude and case  
25 fatality ratio for severe maternal morbidity in sub-Saharan Africa between 1995 and 2010. BMC  
26 Pregnancy Childbirth. 2011;11(65).doi: 10.1186/1471-2393-11-65.  
27  
28 34. Ayele Geleto, Catherine Chojenta, Abdulbasit Musaand Deborah Loxton. Barriers to access and  
29 utilization of emergency obstetric care at health facilities in sub-Saharan Africa: a systematic review of  
30 literature. (2018) 7:183.https://doi.org/10.1186/s13643-018-0842-2.  
31  
32 35. Hailu S, Enqueselassie F, Berhane Y. Health facility-based maternal death audit in Tigray, Ethiopia.  
33 Ethiop J Health Dev. 2009; 23:115–9.  
34  
35 36. Rodolfo Carvalho Pacagnella, Jose Guilherme Cecatti, Maria Jose Osis & João, Paulo Souza. The role  
36 of delays in severe maternal morbidity and mortality: expanding the conceptual  
37 framework.Reproductive Health Matters 2012;20(39):155–163. www.rhm-elsevier.com.  
38 Doi:0.1016/S0968-8080(12)39601-8.  
39  
40 37. Rodolfo C Pacagnella, José G Cecatti, Mary A Parpinelli, Maria H Sousa, Samira M Haddad, Maria L  
41 Costa, João P Souza, Robert C Pattinson and the Brazilian Network for the Surveillance of Severe  
42 Maternal Morbidity, study group. Delays in receiving obstetric care and poor maternal outcomes: results  
43 from a national multicentre cross-sectional study.BMC Pregnancy and Childbirth 2014, 14:159.  
44  
45 38. Bouchra Assarag, Bruno Dujardin, Alexandre Delamou, Fatima-Zahra Meski,, Vincent De Brouwere.  
46 Determinants of Maternal Near-Miss in Morocco: Too Late, Too Far, Too Sloppy?PLOS ONE | January 22,  
47 2015.DOI:10.1371/journal.pone.0116675.  
48  
49  
50  
51  
52  
53  
54  
55  
56  
57  
58  
59  
60

1  
2  
3 39. David M. Goodman, Emmanuel K. Srofenyoh, Adeyemi J. Olufolabi, Sung Min Kim and Medge D.  
4 wen. The third delay: understanding waiting time for obstetric referrals at a large regional hospital in  
5 Ghana: *BMC Pregnancy and Childbirth* (2017) 17:216; DOI 10.1186/s12884-017-1407-4.  
6

7  
8 40. Saira Yunus, Shahnaz Kauser, Shazia Ali. Three “Delays” as a framework for critical analysis of  
9 maternal near miss and maternal mortality. *Journal of South Asian Federation of Obstetrics and*  
10 *Gynecology*, May-August 2013; 5(2):57-59.  
11

12 41. Filippi V, Ronsmans C, Gohou V, et al. Maternity wards or emergency obstetric rooms? Incidence of  
13 near-miss events in African hospitals. *Acta Obstetrica et Gynecologica Scandinavica* 2005; 84(1):11–16.  
14  
15  
16  
17  
18  
19  
20  
21  
22  
23  
24  
25  
26  
27  
28  
29  
30  
31  
32  
33  
34  
35  
36  
37  
38  
39  
40  
41  
42  
43  
44  
45  
46  
47

48 Figure 1. Types of severe maternal outcomes among referred pregnant women, Addis Ababa, Ethiopia,  
49 2019  
50  
51  
52  
53  
54  
55  
56  
57

1  
2  
3  
4  
5  
6  
7  
8  
9  
10  
11  
12  
13  
14  
15  
16  
17  
18  
19  
20  
21  
22  
23  
24  
25  
26  
27  
28  
29  
30  
31  
32  
33  
34  
35  
36  
37  
38  
39  
40  
41  
42  
43  
44  
45  
46  
47  
48  
49  
50  
51  
52  
53  
54  
55  
56  
57  
58  
59  
60

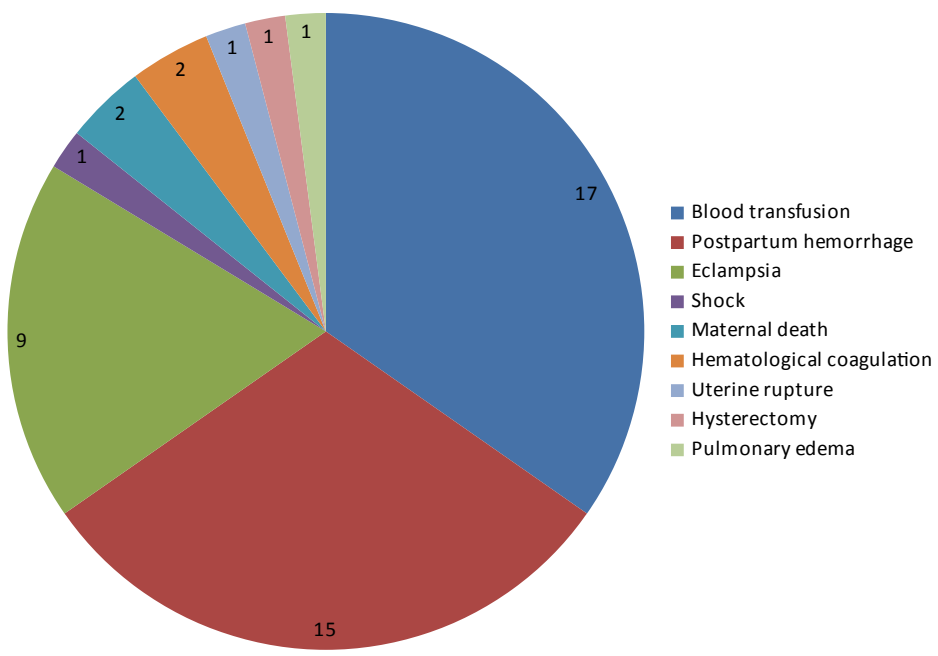

Figure 1. Types of severe maternal outcomes among referred pregnant women, Addis Ababa, Ethiopia, 2019.

# Reporting checklist for cross sectional study.

Based on the STROBE cross sectional guidelines.

## Instructions to authors

Complete this checklist by entering the page numbers from your manuscript where readers will find each of the items listed below.

Your article may not currently address all the items on the checklist. Please modify your text to include the missing information. If you are certain that an item does not apply, please write "n/a" and provide a short explanation.

Upload your completed checklist as an extra file when you submit to a journal.

In your methods section, say that you used the STROBE cross sectional reporting guidelines, and cite them as:

von Elm E, Altman DG, Egger M, Pocock SJ, Gøtzsche PC, Vandenbroucke JP. The Strengthening the Reporting of Observational Studies in Epidemiology (STROBE) Statement: guidelines for reporting observational studies.

|                           |                    |                                                                                                                                 | Page<br>Number |
|---------------------------|--------------------|---------------------------------------------------------------------------------------------------------------------------------|----------------|
| <b>Title and abstract</b> |                    |                                                                                                                                 |                |
| Title                     | <a href="#">#1</a> | Indicate the study's design with a commonly used term in the title or the abstract                                              |                |
| Abstract                  | <a href="#">#1</a> | Provide in the abstract an informative and balanced summary of what was done and what was found                                 |                |
| <b>Introduction</b>       |                    |                                                                                                                                 |                |
| Background / rationale    | <a href="#">#1</a> | Explain the scientific background and rationale for the investigation being reported                                            |                |
| Objectives                | <a href="#">#2</a> | State specific objectives, including any prespecified hypotheses                                                                |                |
| <b>Methods</b>            |                    |                                                                                                                                 |                |
| Study design              | <a href="#">#2</a> | Present key elements of study design early in the paper                                                                         |                |
| Setting                   | <a href="#">#2</a> | Describe the setting, locations, and relevant dates, including periods of recruitment, exposure, follow-up, and data collection |                |
| Eligibility criteria      | <a href="#">#3</a> | Give the eligibility criteria, and the sources and methods of selection of participants.                                        |                |
|                           | <a href="#">#3</a> | Clearly define all outcomes, exposures, predictors, potential confounders, and effect modifiers.                                |                |

Give diagnostic criteria, if applicable

1  
2  
3 Data sources / [#3](#) For each variable of interest give sources of data and details of methods of assessment  
4 measurement (measurement). Describe comparability of assessment methods if there is more than one group.  
5 Give information separately for for exposed and unexposed groups if applicable.  
6

7  
8 Bias [#3](#) Describe any efforts to address potential sources of bias  
9

10  
11  
12 Study size [#4](#) Explain how the study size was arrived at  
13

14  
15 Quantitative [#4](#) Explain how quantitative variables were handled in the analyses. If applicable, describe which  
16 variables groupings were chosen, and why  
17

18  
19 Statistical methods [#4](#) Describe all statistical methods, including those used to control for confounding  
20

21 Statistical methods [#4](#) Describe any methods used to examine subgroups and interactions  
22

23 Statistical methods [#3](#) Explain how missing data were addressed  
24

25  
26 Statistical methods [#3](#) If applicable, describe analytical methods taking account of sampling strategy  
27

28 Statistical methods [#3](#) Describe any sensitivity analyses  
29

## 30 31 Results

32  
33 Participants [#3](#) Report numbers of individuals at each stage of study—eg numbers potentially eligible, examined  
34 for eligibility, confirmed eligible, included in the study, completing follow-up, and analysed.  
35 Give information separately for for exposed and unexposed groups if applicable.  
36

37  
38 Note it was cross-sectional study  
39

40  
41 Participants [#3](#) Give reasons for non-participation at each stage  
42

43 Note: all participants participated  
44

45  
46 Participants [#n/a](#) Consider use of a flow diagram  
47

48  
49  
50 Descriptive data [#4](#) Give characteristics of study participants (eg demographic, clinical, social) and information on  
51 exposures and potential confounders. Give information separately for exposed and unexposed  
52 groups if applicable.  
53

54  
55  
56 Descriptive data [#4](#) Indicate number of participants with missing data for each variable of interest  
57

|    |                    |                      |                                                                                                       |
|----|--------------------|----------------------|-------------------------------------------------------------------------------------------------------|
| 1  | Outcome data       | <a href="#">#6</a>   | Report numbers of outcome events or summary measures. Give information separately for                 |
| 2  |                    |                      | exposed and unexposed groups if applicable.                                                           |
| 3  |                    |                      |                                                                                                       |
| 4  |                    |                      |                                                                                                       |
| 5  |                    |                      |                                                                                                       |
| 6  |                    |                      |                                                                                                       |
| 7  | Main results       | <a href="#">#9</a>   | Give unadjusted estimates and, if applicable, confounder-adjusted estimates and their precision       |
| 8  |                    |                      | (eg, 95% confidence interval). Make clear which confounders were adjusted for and why they            |
| 9  |                    |                      | were included                                                                                         |
| 10 |                    |                      |                                                                                                       |
| 11 |                    |                      |                                                                                                       |
| 12 | Main results       | <a href="#">#10</a>  | Report category boundaries when continuous variables were categorized                                 |
| 13 |                    |                      |                                                                                                       |
| 14 |                    |                      |                                                                                                       |
| 15 | Main results       | <a href="#">#n/a</a> | If relevant, consider translating estimates of relative risk into absolute risk for a meaningful time |
| 16 |                    |                      | period                                                                                                |
| 17 |                    |                      |                                                                                                       |
| 18 |                    |                      |                                                                                                       |
| 19 | Other analyses     | <a href="#">#10</a>  | Report other analyses done—e.g., analyses of subgroups and interactions, and sensitivity              |
| 20 |                    |                      | analyses                                                                                              |
| 21 |                    |                      |                                                                                                       |
| 22 |                    |                      |                                                                                                       |
| 23 | <b>Discussion</b>  |                      |                                                                                                       |
| 24 |                    |                      |                                                                                                       |
| 25 | Key results        | <a href="#">#11</a>  | Summarise key results with reference to study objectives                                              |
| 26 |                    |                      |                                                                                                       |
| 27 |                    |                      |                                                                                                       |
| 28 | Limitations        | <a href="#">#12</a>  | Discuss limitations of the study, taking into account sources of potential bias or imprecision.       |
| 29 |                    |                      | Discuss both direction and magnitude of any potential bias.                                           |
| 30 |                    |                      |                                                                                                       |
| 31 |                    |                      |                                                                                                       |
| 32 | Interpretation     | <a href="#">#12</a>  | Give a cautious overall interpretation considering objectives, limitations, multiplicity of           |
| 33 |                    |                      | analyses, results from similar studies, and other relevant evidence.                                  |
| 34 |                    |                      |                                                                                                       |
| 35 | Generalisability   | <a href="#">#12</a>  | Discuss the generalisability (external validity) of the study results                                 |
| 36 |                    |                      |                                                                                                       |
| 37 |                    |                      |                                                                                                       |
| 38 | <b>Other</b>       |                      |                                                                                                       |
| 39 | <b>Information</b> |                      |                                                                                                       |
| 40 |                    |                      |                                                                                                       |
| 41 |                    |                      |                                                                                                       |
| 42 | Funding            | <a href="#">#13</a>  | Give the source of funding and the role of the funders for the present study and, if applicable, for  |
| 43 |                    |                      | the original study on which the present article is based                                              |
| 44 |                    |                      |                                                                                                       |

None The STROBE checklist is distributed under the terms of the Creative Commons Attribution License CC-BY. This checklist can be completed online using <https://www.goodreports.org/>, a tool made by the [EQUATOR Network](#) in collaboration with [Penelope.ai](#)

# BMJ Open

## Delays in Emergency Obstetrics referrals in Addis Ababa hospitals, Ethiopia: a facility-based, cross-sectional study

|                                 |                                                                                                                                                                                                            |
|---------------------------------|------------------------------------------------------------------------------------------------------------------------------------------------------------------------------------------------------------|
| Journal:                        | <i>BMJ Open</i>                                                                                                                                                                                            |
| Manuscript ID                   | bmjopen-2019-033771.R3                                                                                                                                                                                     |
| Article Type:                   | Original research                                                                                                                                                                                          |
| Date Submitted by the Author:   | 24-Mar-2020                                                                                                                                                                                                |
| Complete List of Authors:       | Assefa, Endalkachew; Addis Ababa University College of Health Sciences, obstetrics and gynecology<br>Berhane, Yemane ; Addis Continental Institute of Public Health,                                       |
| <b>Primary Subject Heading</b>: | Obstetrics and gynaecology                                                                                                                                                                                 |
| Secondary Subject Heading:      | Obstetrics and gynaecology, Evidence based practice, Health services research                                                                                                                              |
| Keywords:                       | Human resource management < HEALTH SERVICES ADMINISTRATION & MANAGEMENT, Health policy < HEALTH SERVICES ADMINISTRATION & MANAGEMENT, Quality in health care < HEALTH SERVICES ADMINISTRATION & MANAGEMENT |
|                                 |                                                                                                                                                                                                            |

SCHOLARONE™  
Manuscripts





I, the Submitting Author has the right to grant and does grant on behalf of all authors of the Work (as defined in the below author licence), an exclusive licence and/or a non-exclusive licence for contributions from authors who are: i) UK Crown employees; ii) where BMJ has agreed a CC-BY licence shall apply, and/or iii) in accordance with the terms applicable for US Federal Government officers or employees acting as part of their official duties; on a worldwide, perpetual, irrevocable, royalty-free basis to BMJ Publishing Group Ltd ("BMJ") its licensees and where the relevant Journal is co-owned by BMJ to the co-owners of the Journal, to publish the Work in this journal and any other BMJ products and to exploit all rights, as set out in our [licence](#).

The Submitting Author accepts and understands that any supply made under these terms is made by BMJ to the Submitting Author unless you are acting as an employee on behalf of your employer or a postgraduate student of an affiliated institution which is paying any applicable article publishing charge ("APC") for Open Access articles. Where the Submitting Author wishes to make the Work available on an Open Access basis (and intends to pay the relevant APC), the terms of reuse of such Open Access shall be governed by a Creative Commons licence – details of these licences and which [Creative Commons](#) licence will apply to this Work are set out in our licence referred to above.

Other than as permitted in any relevant BMJ Author's Self Archiving Policies, I confirm this Work has not been accepted for publication elsewhere, is not being considered for publication elsewhere and does not duplicate material already published. I confirm all authors consent to publication of this Work and authorise the granting of this licence.

1  
2  
3 Delays in Emergency Obstetrics referrals in Addis Ababa hospitals, Ethiopia: a facility-based, cross-  
4 sectional study  
5

6 Endalkachew Mekonnen Assefa<sup>1</sup>, Yemane Berhane<sup>2</sup>  
7

8 <sup>1</sup> Addis Ababa University-College of Health Sciences (AAU-CHS); [endmekon@gmail.com](mailto:endmekon@gmail.com): corresponding  
9 author <sup>2</sup> Addis Continental Institute of Public Health (ACIPH); [yemaneberhane@gmail.com](mailto:yemaneberhane@gmail.com)  
10

11 Abstract  
12

13  
14 **Objectives:** To assess where the delays occur in the referral chain at most and maternal health  
15 outcomes based on the three delay model in Addis Ababa, Ethiopia.  
16

17 **Design:** The study was a facility-based cross-sectional study  
18

19 **Setting:** Two public and tertiary hospitals in Addis Ababa  
20

21 **Participants:** All pregnant women who were referred for only labor and delivery services after 28 weeks  
22 of gestation between December 2018 and February 2019 in Zewditu and Gandhi Memorial hospitals.  
23

24 **Primary and secondary outcome measures:** The primary outcome was the type of delays from the  
25 three-delay model which met operationally defined time. Maternal health outcomes based on the  
26 three-delay model as a secondary outcome.  
27

28 **Results:** A total of 403 pregnant women referred for delivery to the study hospitals were included in  
29 the study. Three-fourth (301, 74.7%) of referred pregnant women had the third delay (delayed receiving  
30 appropriate care); (211, 52.4%) had a first delay (delay in making a decision to seek care). Overall  
31 366(90.8%) pregnant women had experienced at least one of the three delays and 71(17.6%) had all the  
32 three delays. Twenty-nine (7.2%) referred women had severe maternal outcomes (SMO). The most  
33 leading causes/diagnosis of SMO were blood transfusion 17 (58.6%) followed by postpartum  
34 hemorrhage 15 (52%) then eclampsia 9 (31%). In addition, women who experienced severe maternal  
35 outcomes were 2.9 times more likely to have at least one of the three delays.  
36  
37

38 **Conclusion & recommendation:** This study highlights the persistence of delays at all levels and  
39 especially delay three and its contribution to severe maternal outcomes. Strengthening health referral  
40 systems and addressing specific health system bottlenecks during labor and birth in order to ensure no  
41 mother will be endangered. We also recommend a qualitative method of study (focus group discussion  
42 and in-depth interview) and observing the tertiary hospitals set-up and readiness to manage obstetrics  
43 emergencies.  
44  
45  
46  
47  
48

49  
50  
51  
52  
53  
54 **Key words:** Addis Ababa, Emergency obstetrics referral, Severe maternal outcomes, Three-delay model  
55  
56  
57

58 i  
59

1  
2  
3  
4  
5  
6  
7 Article summary  
8

9 Strengths and limitations  
10

- 11 ➤ This study gives the extent of delays and severe maternal outcomes experienced by  
12 women who were referred for labor and delivery.  
13  
14  
15 ➤ This study focused on women with severe maternal outcomes (SMO) rather than less  
16 severe forms of obstetric complications because their situations are the closest to  
17 maternal deaths.  
18  
19  
20 ➤ Women after delivery might be missed if they transferred to health centers and to  
21 other hospitals after delivery for different reasons.  
22  
23  
24  
25  
26 ➤ The results might not be representative of other institutions and the communities  
27 because it was conducted in two referral hospitals that often receive and treat  
28 complicated cases.  
29  
30  
31  
32  
33  
34  
35  
36  
37  
38  
39  
40  
41  
42  
43  
44  
45  
46  
47  
48  
49  
50  
51  
52  
53  
54  
55  
56  
57  
58  
59  
60

## Introduction

According to the World Health Organization's (WHO) report on maternal mortality trends, about 295, 000 women died during and following pregnancy and childbirth in 2017 (1). Similarly, the 2019 WHO maternal mortality fact sheet reported that approximately 810 women die every day from pregnancy related complications. The vast majority of these deaths (94%) occurred in low-resource settings, and most could have been prevented (2). Sub-Saharan Africa alone accounted for roughly two-thirds (196, 000) of maternal deaths and Ethiopia is among thus countries (1, 2).

Globally, it is recognized that significant inroads maternal mortality cannot be made without dramatically increasing access to emergency obstetrical care (EmOC). The World Health Organization estimates that at least 88–98% of maternal deaths can be averted with timely access to existing, emergency obstetric interventions (3). This produces a triple return on investment, saving women and newborns and preventing stillbirths(4).

A number of factors can influence a woman's ability to access effective interventions to treat complications in the event of an obstetric emergency. Thaddeus and Maine (1994) group these into three broad categories using a classic, pathways-based framework known as the 'three delays model'(5).The 'three delays model' attempts to explain delays in women accessing emergency obstetric care as the result of 1) decision-making, 2) accessing services and 3) receipt of appropriate care once a health facility is reached.

Referral is often associated with the second delay of the three delays model– associated with reaching the appropriate level of care. But in fact, a referral system can reduce all three delays. If a population knows that a system is reliable and affordable, families may make the decision to seek care more quickly (the first delay(6).

The major obstacles that affect the referral system reported by both the health workers and women were: 1) financial barriers (for transportation and service payments at health facilities), 2) lack of means of transportation, 3) distance and 4) lack of awareness of services and the importance of services (7).

Factors associated with health-seeking behavior are multidimensional. Socio-cultural and economic problems, lack of awareness, the quality of health services, and infrastructure such as transport services all affect whether and where a woman will seek care, how long it will take to reach care, and whether she receives the appropriate care in a timely fashion(8).

Studies showed referrals in pregnancy and childbirth can be: (1) institutional or self-referral, depending on the involvement of first-line services; (2) antenatal, delivery or postnatal referral; and (3) elective or emergency referral. Pregnant women may be referred due to demographic risks, obstetric historical risks, prenatal complications, and delivery and immediate postnatal complications(9). On the other hand, Studies show that high-risk prediction may not necessarily mean that the woman will have a complication and many women identified as being at risk go on to have normal deliveries(10).

1  
2  
3 Defining a framework and process for obstetric referrals may lead to a reduction of maternal mortality  
4 and morbidity. Referral should be broadly defined to include not only transport, but it should be a timely  
5 referral to minimize or prevent the delay for transportation (called the second delay) and ensure pre-  
6 hospital care while transporting a patient to the referral facility(11), (12).  
7  
8

9 It is widely accepted that substantial reductions in maternal mortality and maternal near- miss are  
10 impossible to achieve without early decision-making to seek care, an effective referral system for  
11 complicated cases and receiving timely and appropriate care (7), (13). Near- miss cases represent most  
12 of the characteristics of maternal deaths but occur more often (14). The near-miss approach assesses  
13 the gap between the actual use and optimal use of high-priority effective interventions in the  
14 prevention and management of severe maternal complications related to pregnancy and childbirth (15).  
15  
16

17 The objective of this study was to determine the types of delay and maternal health outcomes based on  
18 the three delay model among women who referred for labor and delivery. Results from this study may  
19 be an input for the hospitals, health bureau, policy-makers, and other stakeholders to act on bottle-  
20 necks of emergency obstetrics services by identifying the most common types of delay.  
21  
22

## 23 Methods

24 We used the STROBE cross-sectional reporting guidelines (16).  
25  
26

## 27 Study design

28 A facility-based cross-sectional study was conducted between December 10/2018-February 28/2019 in  
29 two government hospitals Zewditu Memorial Hospital (ZMH) and Gandhi Memorial Hospitals (GMH).  
30  
31

## 32 Study setting

33 This study conducted in tertiary hospitals located in the capital city of Ethiopia, Addis Ababa. Both  
34 hospitals are under Addis Ababa Health Bureau and affiliated with Addis Ababa University-College of  
35 Health Sciences. Gandhi Memorial Hospital is a referral maternity hospital and Zewditu Memorial  
36 Hospital is also a comprehensive referral hospital. Both hospitals are catchment hospitals for 40 (forty)  
37 health centers and other health facilities. Both hospitals are giving Comprehensive emergency obstetric  
38 care (CEmOC) and attending more than 17,000 deliveries per year.  
39  
40

41 The referral system for an obstetric emergency in Addis Ababa is organized to include Basic Emergency  
42 obstetric care (BEmOC) and CEmOC facilities. The referral system is developed to work both ways.  
43 Referral between health facilities is facilitated by the liaison office or Maternal Health Task Force. An  
44 ambulance system is organized to transport women accompanied by midwives. The midwife provides  
45 care during transportation and hand-over the mother to the receiving hospital care provider with a  
46 referral paper. In Addis Ababa, all maternity services including labour/delivery and the ambulance  
47 services are provided free of charge in all government health facilities. All hospitals (including primary,  
48 secondary and tertiary), Maternity and Child hospitals are expected to give CEmOC: On the other hand,  
49 all components of BEmOC are expected to be given in the health centres, medium clinics, and specialty  
50 clinics.  
51  
52

### Eligibility criteria

All pregnant women who were referred for only labor and delivery services after 28 weeks of gestation or baby outcome  $\geq 1$  kg and delivered in the selected hospitals, and also who gave consent were included.

### Data Collection Tools

After they gave birth, women were identified and interviewed from emergency OPD, labor ward, and in-patient wards every day before they discharged from the hospital by data collectors using pretested and structured questionnaires.

### Data Collection Procedures

The referral papers reviewed and date, time and diagnosis of referral was recorded for each mother. The triage paper and patient chart are also reviewed including mode of transportation, date and time of arrival, sources of referrals, obstetrics performances, the time taken to admit/get the service after arrival, diagnosis at receiving hospital, gestational age, place and mode of delivery, newborn outcomes, and severe maternal complications types and managements. Women interviewed on socio-demographic characteristics, time interval to seek medical advice and reason for the delay to seek the care (if there was).

The completed questionnaires were reviewed by the principal investigator and supervisors. Incomplete questionnaires were filled if the women were not discharged; otherwise incomplete questionnaires were discarded.

### Main outcomes and measures of the study

The three delays time frame was operationally defined through a consultative process involving six obstetricians & gynecologists (three from each hospital) who had working experience of 7-20 years in the selected hospitals. Accordingly, the first delay defined time elapsed between the recognition of complication/s, and the decision to transport and reach a health facility, was considered if it took more than 60 minutes. The second delay was defined if the mother did not reach to referral hospitals within 60 minutes of referral. The third delay was if the mother didn't receive care or admitted within 30 minutes. Severe maternal outcomes (SMO) were any maternal complications including blood transfusion (any type &  $\geq 2$  units), Post-partum hemorrhage, shock, eclampsia, uterine rupture, pulmonary edema, laparotomy, laboratory evidence of organ damage and/or maternal death during the process of delivery and/or before discharge from the hospital. Potentially life-threatening maternal conditions (PLTMC) was considered when the mother had at least one of the following; hemorrhagic complications, hypertensive disorders, and complications, end-organ injury, blood product transfusion, ICU admission, uterine rupture, hysterectomy/laparotomy.

**Sample size:** Single proportion formula used by assuming 50% of the referred women have a delay, degree of precision of a 5% (d), confidence interval of 95% ( $Z=1.96$ ), assuming 5% non-response rate and the final the sample size was 403.

### Statistical analysis

Data were entered in epi-info version 7.2.2.6 and transported to SPSS Version-21 statistics software for cleaning and analysis. Descriptive statistics were used to present women by their socio-demographic characteristics, referral diagnosis, diagnosis at receiving hospitals, obstetrics characteristics, mode of delivery, newborn outcomes, the three delays, and severe maternal outcomes. Severe maternal outcomes were analyzed for the three delays. The relationship between the three delays and SMO were examined using the multivariate logistic regression. The goodness of the model was tested by the Hosmer-Lemeshow test for goodness-of-fit. Selected variables were included in the model to account for maternal characteristics differences other than delays in seeking and receiving care.

### Ethical issues

Ethical clearance was obtained from both Addis Continental Institute of Public Health (ACIPH) and Addis Ababa Health Bureau (AAHB) Institution Review Board (IRB). Support letters were written to both study hospitals from AAHB-IRB to gain access. Women asked for some questions after obtained informed consent on a voluntary basis. All the responses were given by the participants and the results obtained kept anonymous and confidential.

### Patient and public involvement:

There was no public involvement in the design, conduct, and interpretation of the study. Patients were not asked to advise on interpretation or writing up of results. We did not include patient involvement in the design of this study. We have presented a summary of the findings at medical and public health schools and among health providers in Addis Ababa and plan to continue presenting the results at professional society's conferences. Results were shared with the administration of both selected hospitals and Addis Ababa health Bureau to facilitate improved obstetrics services. There are no plans to disseminate the results of this research to study participants.

### Results

Table 1 shows the descriptive information for socio-demographic and obstetric characteristics of referred pregnant women. The mean age of 403 pregnant women referred for labor-delivery services was  $26.47 \pm 4.5$  years and ranged from 18 to 43. The majority were married (380,94.3%), and have completed at least secondary school (54.3%). The majority of women were primigravida (56.1%), the mean gravidity was  $1.77 \pm 1.1$  and ranged between 1 to 7. Most pregnant women (58.8%) were at term pregnancy (37 weeks- 41w6d) (Table1).

Table 1. Socio-demographic and obstetrics characteristics of respondents, Addis Ababa, Ethiopia, 2019 (n=403)

| Characteristics n=403                             | Number (%) |
|---------------------------------------------------|------------|
| <b>Study Hospital</b>                             |            |
| Gandhi Memorial Hospital (GMH)                    | 173 (42.9) |
| Zewditu Memorial Hospital (ZMH)                   | 230 (57.1) |
| <b>Age (years) median: 26 years (range 18-43)</b> |            |
| < 20                                              | 32 (7.9)   |
| 20-25                                             | 158 (39.2) |
| 26-30                                             | 151 (37.5) |
| 31-35                                             | 46 (11.4)  |
| ≥36                                               | 16 (4.0)   |
| <b>Marital status</b>                             |            |
| Married                                           | 380 (94.3) |
| Others(unmarried, divorced)                       | 23 (5.7)   |
| <b>Educational level</b>                          |            |
| No formal education                               | 49 (12.2)  |
| Primary school                                    | 135 (33.5) |
| Secondary school                                  | 117 (29.0) |
| Preparatory                                       | 35 (8.7)   |
| Vocational and above                              | 67 (16.6)  |
| <b>Gravidity n=403</b>                            |            |
| 1                                                 | 226 (56.1) |
| 2-4                                               | 165 (40.9) |
| ≥5                                                | 12 (3.0)   |



|                 |            |
|-----------------|------------|
| Parity n=146    |            |
| 1               | 90 (61.6)  |
| ≥2              | 56 (38.4)  |
| Abortion n=60   |            |
| 1               | 48 (80)    |
| ≥ 2             | 12 (20)    |
| Gestational age |            |
| 28-33w6d        | 9(2.2)     |
| 34-36w6d        | 22 (5.5)   |
| 37-41w6d        | 237 (58.8) |
| ≥ 42            | 42 (10.4)  |
| Unknown         | 93 (23.1)  |

The majority of the pregnant women were referred from health centers (387, 96%) and transported by the ambulance (72%) (Table 2).

The majority of the women delivered through vaginal route (254, 63.3%) followed by Cesarean-section (148, 36.7%). The most common indication for C-section was non-reassuring fetal heart rate pattern (27 %) followed by cephalo-pelvic disproportion/malpresentation/malposition (24.3%) then meconium staining in the latent first stage of labor (22.3%). The majority of the babies were born alive (389, 96.5%). There were eight (2%) intrapartum fetal losses (Table 2).

Table 2. Source of referral, transportation, mode & place of delivery and perinatal outcome, among referred pregnant women for delivery, Addis Ababa, Ethiopia, 2019.

| Characteristics          | Number (%) |
|--------------------------|------------|
| Source of referral N=403 |            |
| Health Center            | 387 (96.0) |
| Others                   | 16 (4.0)   |

|                                                        |            |
|--------------------------------------------------------|------------|
| Transportation                                         |            |
| Ambulance                                              | 290 (72)   |
| Others( Taxi, personal car)                            | 113 (28)   |
| Receiving hospital contacted before the women referred |            |
| Yes                                                    | 157 (39.0) |
| No                                                     | 246 (61.0) |
| Mode of delivery                                       |            |
| Vaginal delivery                                       | 229 (56.8) |
| Assisted breech delivery                               | 4 (1.0)    |
| C-section                                              | 148 (36.7) |
| Instrumental delivery                                  | 21(5.2)    |
| Vacuum                                                 | 16 (4.0)   |
| Forceps                                                | 5 (1.2)    |
| Laparotomy                                             | 1 (0.2)    |
| C-section indication N=148                             |            |
| Non-reassuring fetal heart rate (NRFHR)                | 40 (27.0)  |
| Meconium in LFSOL                                      | 33 (22.3)  |
| Cephalopelvic disproportion (CPD)                      | 21 (14.2)  |
| Malpresentation/malposition                            | 15 (10.1)  |
| Previous C-scar with labor/labor abnormality           | 10 (6.8)   |
| Cord prolapse/presentation                             | 7 (4.7)    |
| Non reassuring biophysical profile (NRBPP)             | 5 (3.4)    |
| APH                                                    | 4 (2.7)    |
| Others                                                 | 13(8.8)    |

| Place of delivery                    |  | N=403      |
|--------------------------------------|--|------------|
| Labor ward/Operation room            |  | 386 (95.8) |
| Emergency OPD                        |  | 17 (4.2)   |
| Outcome                              |  | N=403      |
| Alive                                |  | 389 (96.5) |
| Newborn referred to NICU             |  | Yes        |
|                                      |  | 137 (34)   |
|                                      |  | No         |
|                                      |  | 252 (62.5) |
| Stillbirth                           |  | 14 (3.5)   |
| Fetal heart beat positive on arrival |  | 8(2.0)     |
| Fetal heart beat negative on arrival |  | 6(1.5)     |

Among 403 referred women for childbirth, 71(17.6%) women experienced all the three delays. Almost three-fourth referred women (74.7%) were experienced the third delay followed by the first delay (52.4%). The majority (366, 90.8%) women had at least one of the delays (Table 3).

Table 3. The frequency of the three delays among referred women, Addis Ababa, Ethiopia 2019.

| Characteristics    | Number (%) |            |
|--------------------|------------|------------|
|                    | N=403      | No         |
| First delay        | 211 (52.4) | 192 (47.6) |
| Second delay       | 163 (40.4) | 240(59.6)  |
| Third delay        | 301(74.7)  | 102(25.3)  |
| At least one delay | 366 (90.8) | 37 (9.2)   |
| All three delay    | 71 (17.6)  | 332 (82.4) |

\*\* multiple answer possible

Twenty-nine (7.2%) women had severe maternal outcomes. The most common severe maternal outcomes were blood transfusion (58.6%) followed by postpartum hemorrhage (51.7%) then eclampsia (31%). Nearly three-fourth women with SMO (78.5%) had more than one complication (Figure1).

The most common delays in women with SMO were the third delay (58.6%) followed by the first delay (51.7%). All most three-fourth women experienced at least one of the delays (79.3%) and one-quarter (24.1%) women had all the delays (Table 4).

Statistically, a significant association was observed between SMO and third delay, at least one of the delays. Referred women with the third delay had 2.2 times (95% CI of 1.025-4.840) more likely to be a risk for severe maternal outcomes. Women who experienced at least one of the delays had 2.9 times (95% CI 1.093-7.620) more likely to be a risk for severe maternal outcomes (Table 4).

After adjusted for age, gravidity, parity, educational level, gestational age, and marital status none of the delays were significant. This may be due to a small sample of women with SMO.

Table 4. SMO and types of delays Addis Ababa, Ethiopia 2019.

| Characteristics    | Severe maternal outcomes |             |            |         |                    |
|--------------------|--------------------------|-------------|------------|---------|--------------------|
|                    | Types of delay           | No          | Yes        | P-value | COR 95 % CI        |
|                    |                          | Number (%)  | Number (%) |         |                    |
| First delay        | No                       | 178 (47.6%) | 14 (48.3)  | 0.944   | 1.028(0.483-2.189) |
|                    | Yes                      | 196 (52.4)  | 15 (51.7)  |         |                    |
| Second delay       | No                       | 224 (59.9)  | 16 (55.2)  | 0.618   | 1.213(0.567-2.596) |
|                    | Yes                      | 150 (40.1)  | 13 (44.8)  |         |                    |
| Third delay        | No                       | 90(24.1)    | 12 (41.4)  | 0.043   | 2.227(1.025-4.840) |
|                    | Yes                      | 284 (75.9)  | 15 (58.6)  |         |                    |
| All delays         | No                       | 310 (82.9)  | 22 (75.9)  | 0.342   | 1.541(0.632-3.761) |
|                    | Yes                      | 64 (17.1)   | 7 (24.1)   |         |                    |
| At least one delay | No                       | 31 (8.3)    | 6 (20.7)   | 0.032   | 2.889(1.093-7.620) |
|                    | Yes                      | 343 (91.7)  | 23(79.3)   |         |                    |

\*\*AOR not significant after adjusted for age, marital status, educational level, gestational age, gravidity, parity.

Eighty (19.9%) of referred women had at least one potential life- threatening conditions (PLTC). The most common complications were hypertensive disorders 56 (70%) followed by blood transfusion 17 (21.3%) then postpartum hemorrhage (Table 5).

Table 5. Potentially life threatening conditions among referred women Addis Ababa, Ethiopia, 2019

| Characteristics* N=80                     | Number (%) |
|-------------------------------------------|------------|
| Hemorrhagic complications                 |            |
| Ante partum hemorrhage (AP,PP)            | 13 (16.3)  |
| Post partum hemorrhage (PPH)              | 15 (18.8)  |
| Ruptured uterus                           | 1 (1.25)   |
| Coagulopathy                              | 2 (2.5)    |
| Hypertensive disorders                    |            |
| Severe hypertension/Preeclampsia          | 50 (62.5)  |
| Eclampsia                                 | 9 (11.3)   |
| HELLP syndrome                            | 2 (2.5)    |
| Others                                    |            |
| Pulmonary edema                           | 1 (1.25)   |
| Shock                                     | 1(1.25)    |
| Thrombocytopenia                          | 2 (2.5)    |
| Management indication of severity         |            |
| Transfusion of blood derivatives          | 17 (21.3)  |
| Major surgical intervention(hysterectomy) | 1(1.25)    |

\*Multiple response possible

## Discussion

All three types of delays were common in the study hospitals; the most severe being the delay within the receiving hospital. The third delay was significantly associated with severe maternal outcomes.

Studies have found that distance to facilities is a clear barrier to women accessing health facilities (17) (18) but in Addis Ababa, proximity to services does not appear to be a problem, as the median distance to a facility that provides surgical services is 5 kilometers, well below the national average of 45 kilometers (19). Two-fifth of women had the second delay. When we compare with other studies it may be low however this proportion of the second delay is not expected because referring facilities/catchment health centers are near to the receiving hospitals and expected to refer by ambulance (20).

This study showed the rate of occurrence of SMO indicators were higher than the findings of an earlier study done in other parts of the country (20-23) and other countries (24-26). This high proportion SMO might be due to the fact that our study selected facilities are referral hospitals that are serving complicated cases and cases referred from other health facilities that were beyond their capacity/needed further interventions. This study showed that direct obstetric causes were the most common leading factors of SMO and the most common diagnosis were postpartum hemorrhage (52%) followed by eclampsia (31%) and the most common intervention was blood transfusion (58.6%). Obstetric hemorrhage and hypertensive disorders (eclampsia, hematological coagulation, and pulmonary edema) were found to be the top underlying complications among cases of SMO; similarly, hypertensive disorders and obstetric hemorrhage were the most common underlying causes of PLTC. This is comparable to the findings from studies in other parts of the country (23), (24) (25) and other countries (25-29) including sub-Saharan countries (30) (31).

Emergency obstetric care use by pregnant women is influenced by a complex interaction of factors leading to delay in decision-making, accessing services and receipt of proper care once a health facility is reached(30) (31). Receiving appropriate care after reaching the health facility (delay three) was the most common (58.6%) followed by a delay in seeking care (delay one) (51.7%) then reaching at the appropriate health facility (delay two) (44.8%) were identified among SMO and more than half of (58.6%) SMO cases had encountered at least one of the delays which were similar to study done elsewhere in the country (21) (32) (33); however, delay two and one is seen less frequently than the findings from other countries (25) (30) (31) (34-37). This can be justified by the overloaded cases, limited hospital capacity, the difference in socio-demographic characteristics of the study population and the proximity of health facilities.

In this study, failure to receiving appropriate care after reaching the health facility (delay three) was found to have the strongest association with SMO: with a two-fold increase in the risk. This supports the WHO hypothesis relating a high case fatality in the hospital as an indicator for the presence of delay in receiving adequate and proper treatment (17) and it indicates the poor performance of obstetrics services (38) (39). Seeking care from a facility that is incapacitated health facility and system, poor leadership (mismanagements of hospital resources, poor co-ordinations and lack of understanding of

1  
2  
3 obstetrics emergencies) contribute to significant delay after reaching the health facility. These factors  
4 were reported as significant contributors to delay in several studies (21) (32) (34) (35). Studies from  
5 Tigray, 88% of all maternal deaths were attributed to health system failure (33). In our study, 59 % of  
6 SMO cases and both maternal deaths (MD) had health system-related factors as a possible reason for  
7 delay three.  
8  
9

10 The limitation of this study include that it was conducted in two referral hospitals which often receive  
11 complicated cases and referred women with complications; the results might not be representative of  
12 other institutions and the community. In addition, cases might be missed because if they transferred to  
13 health centers and other hospitals after delivery for different reasons.  
14  
15

16 However, we believe that this study gives the extent of delays and SMO & its indicators experienced by  
17 women who were referred for an emergency delivery. In fact, if the delay is so severe in these well-  
18 established referral centers one may expect it to be worse in some not well-staffed and equipped  
19 centers. We decided to focus on women with severe maternal outcomes (SMO) rather than less severe  
20 forms of obstetric complications because their situations are the closest to maternal deaths.  
21  
22

## 23 Conclusion

24  
25 The burden of severe maternal outcomes (SMO) is high due to preventable and/or treatable direct  
26 obstetric causes. The majority of the women in this study had serious delays in both making decisions to  
27 seek care for birthing and in actually receiving care once at a hospital. We recommend strengthening  
28 health referral systems and addressing specific health systems bottlenecks during labor and delivery in  
29 order to ensure no woman will be endangered. We also recommend a qualitative method of study  
30 (including focus group discussion, in-depth interview) and observing the tertiary hospitals set-up and  
31 readiness to manage high-risk pregnancies.  
32  
33  
34

## 35 Abbreviations

36  
37 AAHB-IRB: Addis Ababa Health Bureau-Institutional Review Board

38  
39 BEmOC: Basic Emergency Obstetrics Care

40  
41 CEmOC: Comprehensive Emergency Obstetrics Care

42  
43 GMH: Gandhi Memorial Hospital

44  
45 HELLP: Hemolysis, Elevated liver enzyme, Low Platelets

46  
47 ICU: Intensive Care Unit

48  
49 LW: Labor Ward

50  
51 MD: Maternal Death Ratio

52  
53 MNM: Maternal Near-Miss

1  
2  
3 MWH: Maternity Waiting Home  
4

5 OPD: Out-Patient Department  
6

7 PIH: Pregnancy Induced Hypertension  
8

9 PLTC: Potential Life Threatening Conditions  
10

11 PPH: Post Partum Hemorrhage  
12

13 SMO: Severe Maternal Outcomes  
14

15 WHO: World Health Organization  
16

17 ZMH: Zewditu Memorial Hospital  
18

19 Acknowledgments  
20

21  
22 We would like to thank residents and Interns of Addis Ababa University-College of Health sciences:  
23 without their support on data collection this research may not be reached to this stage.  
24

25 Author Details  
26

27 <sup>1</sup>Endalkachew Mekonnen Assefa (MD, MPH), Addis Ababa University-College of Health Sciences  
28 Department of Obstetrics and Gynecology; e-mail-[endmekon@gmail.com](mailto:endmekon@gmail.com); phone no. +251-913605674:  
29 corresponding author  
30

31 <sup>2</sup>Yemane Berhane (MD, Ph.D.), Addis Continental Institute of Public Health; [yemaneberhane@gmail.com](mailto:yemaneberhane@gmail.com)  
32  
33

34 Contributors: EMA did design of the work, drafting the work, analysis, interpretation of data for the  
35 work and write-up the manuscript. YB advised the paper's scope, the draft of the manuscript and did  
36 revise it critically for important intellectual content. Both authors approved the final version.  
37  
38

39 Conflict of interest: None declared  
40

41 Source of funding: 'This research received no specific grant from any funding agency in the public,  
42 commercial or not-for-profit sectors'.  
43

44 Ethics approval: Ethical approval was received from both Addis Continental Institute of Public Health  
45 and Addis Ababa Health Bureau ethical review board.  
46  
47

48 Data availability statement: Extra data can be accessed via the Dryad data repository at  
49 <http://datadryad.org/> with the doi: 10.5061/dryad.x95x69pfh  
50



## References

1. WHO, et al. Trends in maternal mortality: 2000 to 2017. Geneva: WHO; 2019.  
[<https://www.who.int/reproductivehealth/publications/maternal-mortality-2000-2017/en/>]
2. WHO. Maternal mortality; fact sheets: WHO. 19 September 2019. [<https://www.who.int/news-room/fact-sheets/detail/maternal-mortality>]
3. World Health Organization (WHO). Maternal Mortality. Fact Sheet. Media Centre. 2016;
4. World Health Organization (WHO). True magnitude of stillbirths and maternal and neonatal deaths underreported. Media Cent. 2016;
5. Thaddeus S, Maine D. Too far too walk: maternal mortality in context. *Soc Sci Med*. 1994;38:1091–110.
6. The Effectiveness of Emergency Obstetric Referral Interventions in Developing Country Settings: A Systematic Review [Internet]. [cited 2018 Jul 28]. Available from:  
<http://journals.plos.org/plosmedicine/article?id=10.1371/journal.pmed.1001264>
7. Knight HE, Self A, Kennedy SH. Why Are Women Dying When They Reach Hospital on Time? A Systematic Review of the ‘Third Delay.’ *PLoS ONE* [Internet]. 2013 May 21 [cited 2018 Sep 7];8(5). Available from: <https://www.ncbi.nlm.nih.gov/pmc/articles/PMC3660500/>
8. JSI Research and Training Institute. The Last 10 Kilometers (L10K). Emergency referral for pregnant women and newborns: A Rapid Community and Health System Assessment. BETA Development Consulting Firm, Addis Ababa. 2012 Jun;
9. U. Onwudiegwu, O. C.Ezechi. Emergency obstetric admissions: late referrals, misdiagnoses and consequences. *J J Obstet Gynaecol*. 2001; Volume 21 (Issue 6).
10. Bossyns P, Abache R, Abdoulaye MS, Miyé H, Depoorter A-M, Van Lerberghe W. Monitoring the referral system through benchmarking in rural Niger: an evaluation of the functional relation between health centres and the district hospital. *BMC Health Serv Res*. 2006 Apr 12;6(1):51.
11. Giovine A, Ostrowski C. Technical report on Improving Transportation and Referral for Maternal Health: Knowledge Gaps and Recommendations. Wilson Cent. 2010;
12. Ronsmans C, Graham WJ, Lancet. Maternal Survival Series steering group: Maternal mortality: who, when, where, and why. *Lancet*. 2006;(368(9542)):1189–2000.
13. Qureshi RN, Sikandar R, Hoodbhoy Z, Bano R, Jabeen N. Referral pattern of emergencies in obstetrics: Implications for defining scope of services and policy. *JPMA J Pak Med Assoc*. 2016;66(12):1606–10.

14. Ellen Nelissen, Estomih Mduma, Jacqueline Broerse, Hege Ersdal, Bjørg Evjen-Olsen, Jos van Roosmalen, Jelle Stekelenburg. Applicability of the WHO Maternal Near Miss Criteria in a Low-Resource Setting. PLOS ONE | www.plosone.org. April 2013 | Volume 8 | Issue 4 | e6124.
15. World Health Organization. Evaluating the quality of care for severe pregnancy complications: the WHO near-miss approach for maternal health. Geneva: WHO; 2011.
16. Von Elm E, Altman DG, Egger M, Pocock SJ, Gotsche PC, Vandenbroucke JP. The Strengthening the Reporting of Observational Studies in Epidemiology (STROBE) Statement: guidelines for reporting observational studies.
17. McNamee P, Ternent L, Hussein J. Barriers in accessing maternal healthcare: evidence from low-and middle-income countries. Expert Rev Pharmacoecon Outcomes Res.2009;9(1):41–8.
18. Gabrysch SC, Oona MR. Still to far to walk: Literature review of the determinants of delivery service use. BMC Pregnancy Childbirth. 2009;9(34).<http://www.biomedcentral.com/1471-2393/9/34>.
19. Federal Ministry of Health, Addis Ababa Regional Health Bureau. Emergency Obstetric and Newborn Care Services: Standard Operation Manual for Activities of Catchment Teams in Addis Ababa. 2012.
20. Dile M, Abate T, Seyum T. Proportion of maternal near misses and associated factors in referral hospitals of Amhara regional state, Northwest Ethiopia: institution-based cross-sectional study. GynecolObstet (Sunnyvale). 2015; 5:308. <https://doi.org/10.4172/2161-0932.1000308>.
21. Wondimagegnehu Sisay Woldeyes, Dejene Asefa and Geremew Muleta. Incidence and determinants of severe maternal outcome in Jimma University teaching hospital, south-West Ethiopia: a prospective cross-sectional study. Woldeyes Al BMC Pregnancy Childbirth 2018. 18:255(18:255).
22. Gebrehiwot Y, Tewelde BT. Improving maternity care in Ethiopia through facility based review of maternal deaths and near misses. Int J GynecolObstet. 2014; 127:S29–34.
23. Liyew EF, Yalew AW, Afework MF, Esse. Incidence and causes of maternal near-miss in selected hospitals of Addis Ababa, Ethiopia. ONE. 2017;12(6):e0179013. <https://doi.org/10.1371/journal.pone.0179013>.
24. Jabir M, et al. Maternal near miss and quality of maternal health care in Baghdad, Iraq. BMC Pregnancy Childbirth. 2013;13:11.
25. Leonardo Antonio Chavane, Patricia Bailey, Osvaldo Loquiha, Martinho Dgedge, Marc Aerts, and Marleen Temmerman. Maternal death and delays in accessing emergency obstetric care in Mozambique. BMC Pregnancy and Childbirth. (2018) 18:71 <https://doi.org/10.1186/s12884-018-1699-z>.

- 1  
2  
3 26.Syeda B.Mazhar, AfshanBatoool, AngelaEmanuel, Arif T.Khan, ShireenBhutta.Severe maternal  
4 outcomes and their predictors among Pakistani women in the WHO Multicountry Survey on Maternal  
5 and Newborn Health. *International Journal of Gynecology & Obstetrics* Volume 129, Issue 1, April 2015,  
6 Pages 30-33.  
7  
8  
9  
10 27. Özge Tunçalp, Michelle J. Hindin, Kwame Adu-Bonsaffoh , Richard M., Adanu. Assessment of  
11 maternal near-miss and quality of care in a hospital- based study in Accra, Ghana. *Int J Gynecol Obstet*  
12 123 (2013) 58–63.  
13  
14 28. Say L, Souza JP, Pattinson RC. WHO working group on Maternal Mortality and Morbidity  
15 classifications. *Maternal near miss–towards a standard tool for monitoring quality of maternal health*  
16 *care*. 2009. 23:287–96.  
17  
18  
19 29. Nelissen EJ, et al. Maternal near miss and mortality in a rural referral hospital in northern Tanzania: a  
20 cross-sectional study. *BMC Pregnancy Childbirth*. 2013;13:141.  
21  
22  
23 30. Oladapo et al. When getting there is not enough: a nationwide cross-sectional study of 998 maternal  
24 deaths and 1451 near-misses in public tertiary hospitals in a low-income country.  
25 *BJOG*.2015.www.bjog.org.DOI: 10.1111/1471-0528.13450.  
26  
27  
28 31. Dan K Kaye, Othman Kakaire, and Michael O Osinde. Systematic review of the magnitude and case  
29 fatality ratio for severe maternal morbidity in sub-Saharan Africa between 1995 and 2010. *BMC*  
30 *Pregnancy Childbirth*. 2011;11(65).doi: 10.1186/1471-2393-11-65.  
31  
32  
33 32. Ayele Geleto, Catherine Chojenta, Abdulbasit Musaand Deborah Loxton. Barriers to access and  
34 utilization of emergency obstetric care at health facilities in sub-Saharan Africa: a systematic review of  
35 literature. (2018) 7:183.https://doi.org/10.1186/s13643-018-0842-2.  
36  
37  
38 33. Hailu S, Enqueselassie F, Berhane Y. Health facility-based maternal death audit in Tigray, Ethiopia.  
39 *Ethiop J Health Dev*. 2009; 23:115–9.  
40  
41  
42 34. Rodolfo Carvalho Pacagnella, Jose Guilherme Cecatti, Maria Jose Osis & João, Paulo Souza. The role  
43 of delays in severe maternal morbidity and mortality: expanding the conceptual  
44 framework.*Reproductive Health Matters* 2012;20(39):155–163. www.rhm-elsevier.com.  
45 Doi:0.1016/S0968-8080(12)39601-8.  
46  
47  
48 35. Rodolfo C Pacagnella, José G Cecatti, Mary A Parpinelli, Maria H Sousa, Samira M Haddad, Maria L  
49 Costa, João P Souza, Robert C Pattinson and the Brazilian Network for the Surveillance of Severe  
50 Maternal Morbidity, study group. Delays in receiving obstetric care and poor maternal outcomes: results  
51 from a national multicentre cross-sectional study.*BMC Pregnancy and Childbirth* 2014, 14:159.  
52  
53  
54 36. Bouchra Assarag, Bruno Dujardin, Alexandre Delamou, Fatima-Zahra Meski,, Vincent De Brouwere.  
55 Determinants of Maternal Near-Miss in Morocco: Too Late, Too Far, Too Sloppy?PLOS ONE | January 22,  
56 2015.DOI:10.1371/journal.pone.0116675.  
57  
58  
59  
60

- 1  
2  
3 37. David M. Goodman, Emmanuel K. Srofenyoh, Adeyemi J. Olufolabi, Sung Min Kim and Medge D.  
4 wen. The third delay: understanding waiting time for obstetric referrals at a large regional hospital in  
5 Ghana: *BMC Pregnancy and Childbirth* (2017) 17:216; DOI 10.1186/s12884-017-1407-4.  
6  
7  
8 38. Saira Yunus, Shahnaz Kauser, Shazia Ali. Three “Delays” as a framework for critical analysis of  
9 maternal near miss and maternal mortality. *Journal of South Asian Federation of Obstetrics and*  
10 *Gynecology*, May-August 2013; 5(2):57-59.  
11  
12 39. Filippi V, Ronsmans C, Gohou V, et al. Maternity wards or emergency obstetric rooms? Incidence of  
13 near-miss events in African hospitals. *Acta Obstetrica et Gynecologica Scandinavica* 2005; 84(1):11–16.  
14  
15  
16  
17  
18  
19  
20  
21  
22  
23  
24  
25  
26  
27  
28  
29  
30  
31  
32  
33  
34  
35  
36  
37  
38  
39  
40  
41  
42  
43  
44  
45  
46  
47

48 Figure 1. Types of severe maternal outcomes among referred pregnant women, Addis Ababa, Ethiopia,  
49 2019  
50  
51  
52  
53  
54  
55  
56  
57

1  
2  
3  
4  
5  
6  
7  
8  
9  
10  
11  
12  
13  
14  
15  
16  
17  
18  
19  
20  
21  
22  
23  
24  
25  
26  
27  
28  
29  
30  
31  
32  
33  
34  
35  
36  
37  
38  
39  
40  
41  
42  
43  
44  
45  
46  
47  
48  
49  
50  
51  
52  
53  
54  
55  
56  
57  
58  
59  
60



Figure 1. Types of severe maternal outcomes among referred pregnant women, Addis Ababa, Ethiopia, 2019.

# Reporting checklist for cross sectional study.

Based on the STROBE cross sectional guidelines.

## Instructions to authors

Complete this checklist by entering the page numbers from your manuscript where readers will find each of the items listed below.

Your article may not currently address all the items on the checklist. Please modify your text to include the missing information. If you are certain that an item does not apply, please write "n/a" and provide a short explanation.

Upload your completed checklist as an extra file when you submit to a journal.

In your methods section, say that you used the STROBE cross sectional reporting guidelines, and cite them as:

von Elm E, Altman DG, Egger M, Pocock SJ, Gøtzsche PC, Vandenbroucke JP. The Strengthening the Reporting of Observational Studies in Epidemiology (STROBE) Statement: guidelines for reporting observational studies.

|                           |                    |                                                                                                                                 | Page<br>Number |
|---------------------------|--------------------|---------------------------------------------------------------------------------------------------------------------------------|----------------|
| <b>Title and abstract</b> |                    |                                                                                                                                 |                |
| Title                     | <a href="#">#1</a> | Indicate the study's design with a commonly used term in the title or the abstract                                              |                |
| Abstract                  | <a href="#">#1</a> | Provide in the abstract an informative and balanced summary of what was done and what was found                                 |                |
| <b>Introduction</b>       |                    |                                                                                                                                 |                |
| Background / rationale    | <a href="#">#1</a> | Explain the scientific background and rationale for the investigation being reported                                            |                |
| Objectives                | <a href="#">#2</a> | State specific objectives, including any prespecified hypotheses                                                                |                |
| <b>Methods</b>            |                    |                                                                                                                                 |                |
| Study design              | <a href="#">#2</a> | Present key elements of study design early in the paper                                                                         |                |
| Setting                   | <a href="#">#2</a> | Describe the setting, locations, and relevant dates, including periods of recruitment, exposure, follow-up, and data collection |                |
| Eligibility criteria      | <a href="#">#3</a> | Give the eligibility criteria, and the sources and methods of selection of participants.                                        |                |
|                           | <a href="#">#3</a> | Clearly define all outcomes, exposures, predictors, potential confounders, and effect modifiers.                                |                |

Give diagnostic criteria, if applicable

1  
2  
3 Data sources / [#3](#) For each variable of interest give sources of data and details of methods of assessment  
4 measurement (measurement). Describe comparability of assessment methods if there is more than one group.  
5 Give information separately for for exposed and unexposed groups if applicable.  
6

7  
8 Bias [#n/a](#) Describe any efforts to address potential sources of bias  
9

10  
11  
12 Study size [#3](#) Explain how the study size was arrived at  
13

14  
15 Quantitative [#3](#) Explain how quantitative variables were handled in the analyses. If applicable, describe which  
16 variables groupings were chosen, and why  
17

18  
19 Statistical methods [#4](#) Describe all statistical methods, including those used to control for confounding  
20

21 Statistical methods [#4](#) Describe any methods used to examine subgroups and interactions  
22

23  
24 Statistical methods [#3](#) Explain how missing data were addressed  
25

26 Statistical methods [#3](#) If applicable, describe analytical methods taking account of sampling strategy  
27

28 Statistical methods [#n/a](#) Describe any sensitivity analyses  
29

## 30 31 Results

32  
33 Participants [#4](#) Report numbers of individuals at each stage of study—eg numbers potentially eligible, examined  
34 for eligibility, confirmed eligible, included in the study, completing follow-up, and analysed.  
35 Give information separately for for exposed and unexposed groups if applicable.  
36  
37

38  
39  
40  
41 Participants [#4](#) Give reasons for non-participation at each stage  
42

43  
44  
45 Participants [#n/a](#) Consider use of a flow diagram  
46  
47

48  
49  
50 Descriptive data [#4](#) Give characteristics of study participants (eg demographic, clinical, social) and information on  
51 exposures and potential confounders. Give information separately for exposed and unexposed  
52 groups if applicable.  
53  
54

55  
56 Descriptive data [#5](#) Indicate number of participants with missing data for each variable of interest  
57  
58

|    |                    |                      |                                                                                                       |
|----|--------------------|----------------------|-------------------------------------------------------------------------------------------------------|
| 1  | Outcome data       | <a href="#">#5</a>   | Report numbers of outcome events or summary measures. Give information separately for                 |
| 2  |                    |                      | exposed and unexposed groups if applicable.                                                           |
| 3  |                    |                      |                                                                                                       |
| 4  |                    |                      |                                                                                                       |
| 5  |                    |                      |                                                                                                       |
| 6  |                    |                      |                                                                                                       |
| 7  | Main results       | <a href="#">#9</a>   | Give unadjusted estimates and, if applicable, confounder-adjusted estimates and their precision       |
| 8  |                    |                      | (eg, 95% confidence interval). Make clear which confounders were adjusted for and why they            |
| 9  |                    |                      | were included                                                                                         |
| 10 |                    |                      |                                                                                                       |
| 11 |                    |                      |                                                                                                       |
| 12 | Main results       | <a href="#">#10</a>  | Report category boundaries when continuous variables were categorized                                 |
| 13 |                    |                      |                                                                                                       |
| 14 |                    |                      |                                                                                                       |
| 15 | Main results       | <a href="#">#n/a</a> | If relevant, consider translating estimates of relative risk into absolute risk for a meaningful time |
| 16 |                    |                      | period                                                                                                |
| 17 |                    |                      |                                                                                                       |
| 18 |                    |                      |                                                                                                       |
| 19 | Other analyses     | <a href="#">#10</a>  | Report other analyses done—e.g., analyses of subgroups and interactions, and sensitivity              |
| 20 |                    |                      | analyses                                                                                              |
| 21 |                    |                      |                                                                                                       |
| 22 |                    |                      |                                                                                                       |
| 23 | <b>Discussion</b>  |                      |                                                                                                       |
| 24 |                    |                      |                                                                                                       |
| 25 | Key results        | <a href="#">#11</a>  | Summarise key results with reference to study objectives                                              |
| 26 |                    |                      |                                                                                                       |
| 27 |                    |                      |                                                                                                       |
| 28 | Limitations        | <a href="#">#12</a>  | Discuss limitations of the study, taking into account sources of potential bias or imprecision.       |
| 29 |                    |                      | Discuss both direction and magnitude of any potential bias.                                           |
| 30 |                    |                      |                                                                                                       |
| 31 | Interpretation     | <a href="#">#12</a>  | Give a cautious overall interpretation considering objectives, limitations, multiplicity of           |
| 32 |                    |                      | analyses, results from similar studies, and other relevant evidence.                                  |
| 33 |                    |                      |                                                                                                       |
| 34 |                    |                      |                                                                                                       |
| 35 | Generalisability   | <a href="#">#12</a>  | Discuss the generalisability (external validity) of the study results                                 |
| 36 |                    |                      |                                                                                                       |
| 37 |                    |                      |                                                                                                       |
| 38 | <b>Other</b>       |                      |                                                                                                       |
| 39 | <b>Information</b> |                      |                                                                                                       |
| 40 |                    |                      |                                                                                                       |
| 41 |                    |                      |                                                                                                       |
| 42 | Funding            | <a href="#">#13</a>  | Give the source of funding and the role of the funders for the present study and, if applicable, for  |
| 43 |                    |                      | the original study on which the present article is based                                              |
| 44 |                    |                      |                                                                                                       |

None The STROBE checklist is distributed under the terms of the Creative Commons Attribution License CC-BY. This checklist can be completed online using <https://www.goodreports.org/>, a tool made by the [EQUATOR Network](#) in collaboration with [Penelope.ai](#)
